# Supplementary material
Source: ML conference proceedings conference paper supplement (https://openreview.net/forum?id=ZNFe2PvTr7)
Supplement: supplementary_material [file Turtorial_quiz.pdf › Turtorial_quiz.pdf]

研究简介和知情同意书

研究介绍 & 知情同意书

研究题目：心智大师角色扮演

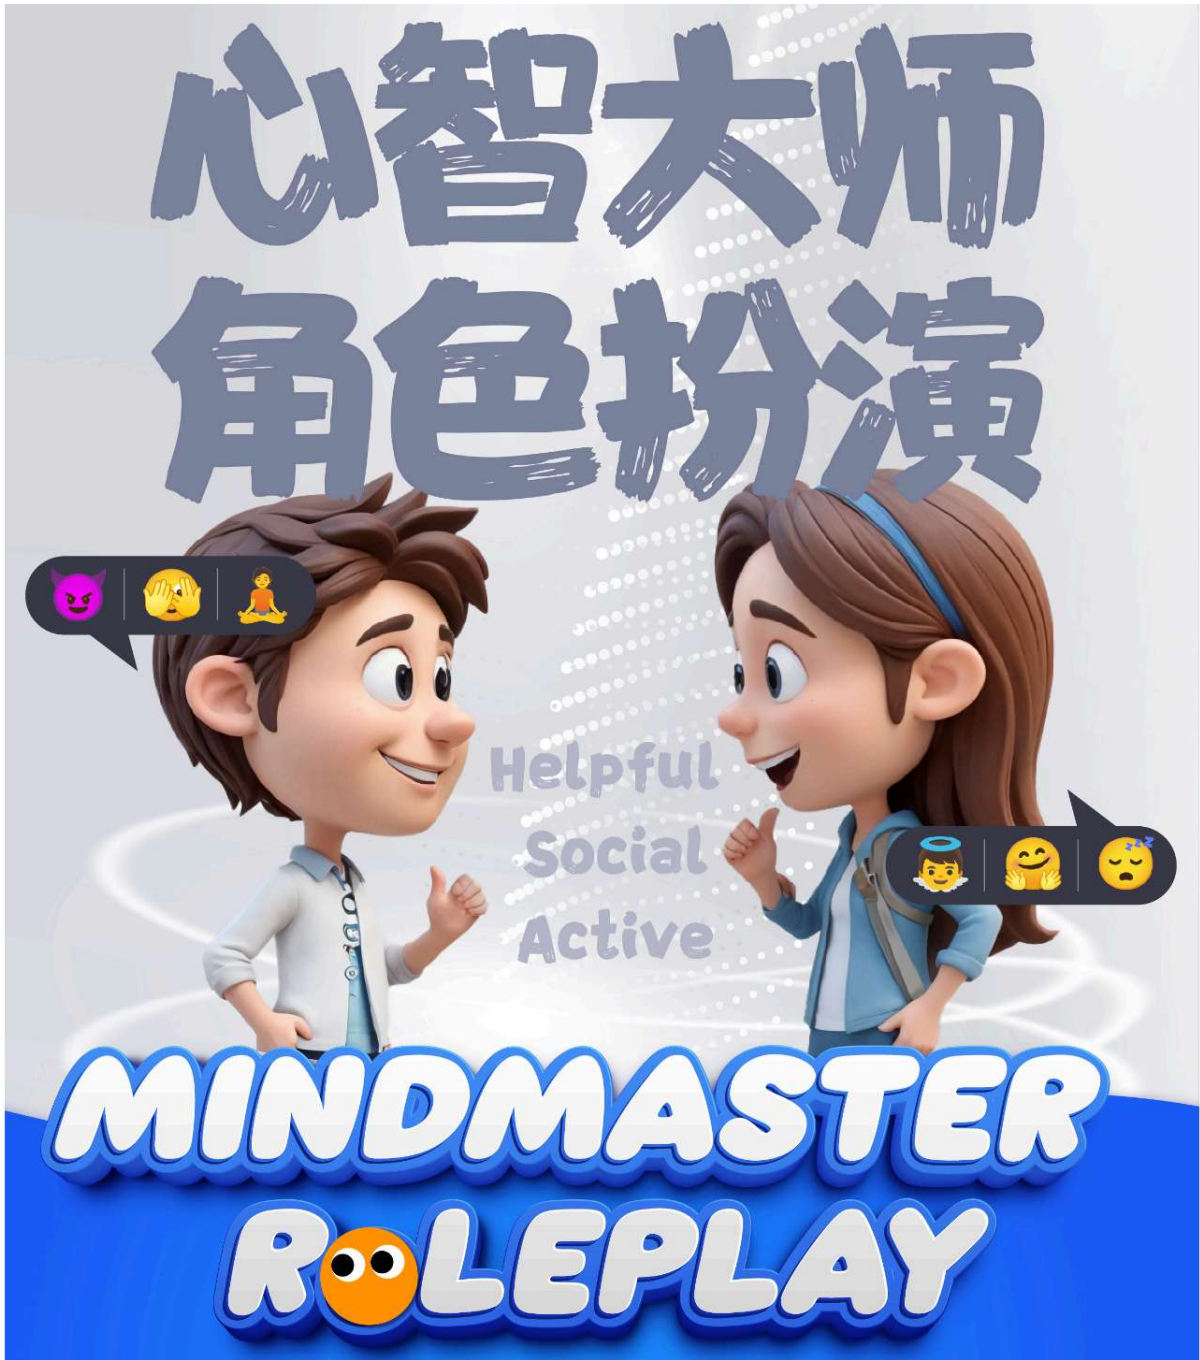

# 研究简介：

本游戏旨在探究**在不同的任务场景中、拥有不同角色设定的智能体**如何决策和行动。

具体地，我们希望学习智能体在不同的心智状态——包括信念（belief）、价值（value）、意图（intent）——下，如何去理解和推测其他智能体的心智状态（例如其他智能体的意图），如何更新自己的心智状态（比如自己的意图会不会作出调整），在面对一些冲突时如何抉择（比如要不要放弃自己的目标先去帮助别人，或者比较懒不想动但又需要完成目标该怎么办、要不要请求帮助等），以及如何做出相应的行动规划。

我们希望参与研究的被试能够根据给定的角色设定（包括三个价值维度：helpful、social、active，分别代表乐于助人、社交外向、勤快好动）来进行角色扮演，我们可能会分配一个初始意图（也可能不会），**被试者要做的就是充分投入地扮演好自己的角色，带着角色的初始意图设定（如果有）和角色的价值设定去行动，设身处地地给出合理的选择。当自己的角色人设和完成给定的初始意图之间有矛盾的时候，要代入角色和情境去思考，做出合理的决策即可。**

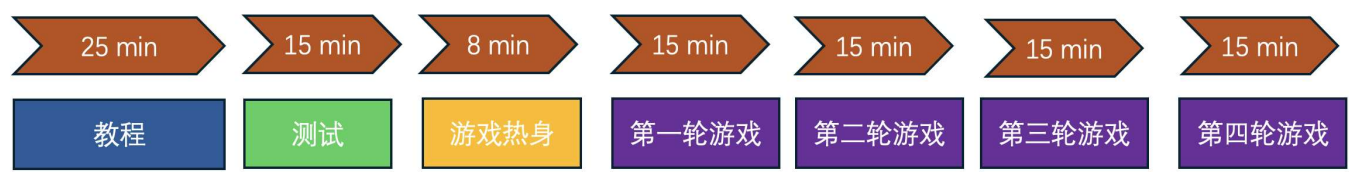

**研究中将发生的事情和时长：**研究的主体部分包括3~4轮主游戏（一轮大约15分钟，视时间决定玩几轮），每轮中间可以休息2分钟。此外为了辅助您进行游戏、保证实验质量，我们还在主游戏开始之前设置了一个大约25分钟的教程，您需要认真看完教程，了解游戏设置；之后您需要通过一个关于教程内容的小测试（大约需要15分钟）。我们还准备了一个8分钟的游戏热身，帮助您实际上手感受了解游戏（大约8分钟）。

**评估标准和奖励：**您需要认真阅读教程，通过测试，并完成两轮主游戏。主游戏需要和另一个被试配对完成，您有可能会被分配一个初始的意图，如果角色需要，您也可以对此做出合理调整；我们对您游戏表现的评估标准是需要您完全投入您的角色并结合具体情境去思考并做出合理的决策。成功完成每一部分都会获得相应的基础被试费：具体地，完成游戏教程并通过测试可得25元，完成几轮游戏可得95元。在基础被试费用之外，我们会用我们设置的客观指标来科学评估您的答题质量，并据此给予相应的奖金（范围是1~30元）。实验结束之后，我们会收集您的银行卡信息并将报酬和奖励打入您的银行账户。

**风险：**本研究没有已知的风险。

**保密性：**在本研究中，我们承诺严格保密所有收集的个人信息。所有能够识别到个人身份的信息（例如姓名、联系方式、IP地址

等) 将被匿名化或使用编码替代, 以确保无法直接关联到具体个人。所有数据将仅用于研究目的, 且仅限于研究团队内部共享。我们不会将任何个人数据泄露给任何第三方, 也不会将其用于其他非研究目的。所有数据将在研究结束后的指定时间内删除或销毁。

**您的权利:** 您有权在任何时候退出研究, 且不会有任何后果。

**帮助:** 如有任何进一步的问题或疑虑, 请联系在场的研究人员寻求帮助。您也可以给我们发邮件, 我们的邮箱是 mm-roleplay@outlook.com, 我们会第一时间给您回复。

**同意:** 继续进行即表示您已阅读此信息表并理解参与本研究的条件。如果您同意参与, 请点击下面的“是的, 我同意”按钮以开始教程。

☐ 是的, 我同意

☐ 不, 我不同意

## 退出游戏

您已经退出本研究。

感谢您对我们研究的兴趣!



# Demographic Information

姓名

邮箱

年龄

性别

- ☐ 男
- ☐ 女
- ☐ 其他

受教育程度（包括在读的）

- ☐ 小学
- ☐ 初中
- ☐ 高中
- ☐ 大学专科
- ☐ 本科
- ☐ 硕士
- ☐ 博士

## tutorial - 界面

感谢您来参加我们的研究! 

下面您将进入教程, 请您仔细阅读~

# 教程概览

## 01 游戏界面介绍

## 02 游戏流程介绍

这是游戏的入口界面，请您正确填写您的邮箱和姓名，方便我们后续联系您发放酬劳和奖金等。我们保证不会泄露您的隐私信息，请您放心。

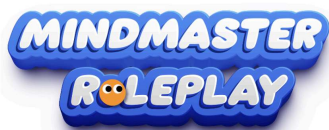

Email

name

Login

这是游戏主界面。这个游戏需要您和另一个玩家在线配对，请您等待配对完成后开始游戏。

游戏界面的分块介绍请看下一页。

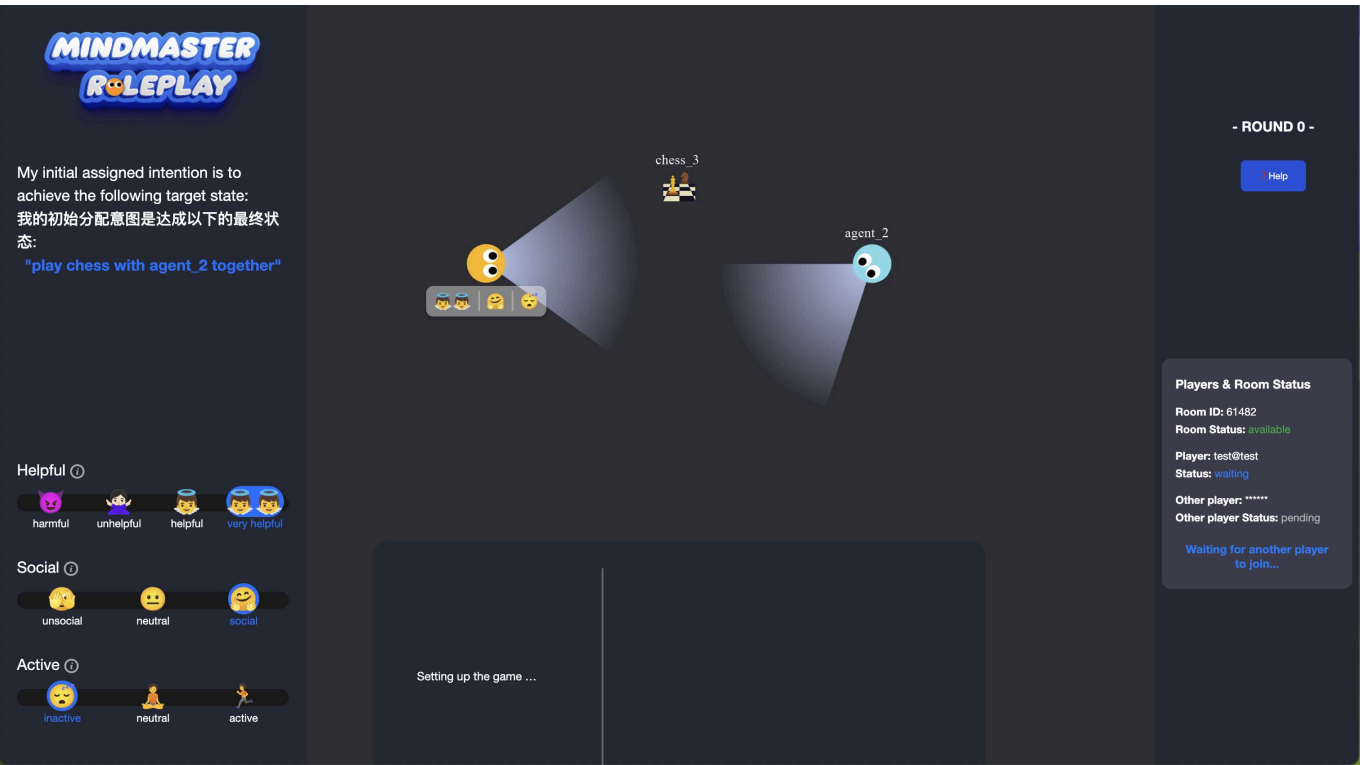

以下是游戏界面的分块介绍：

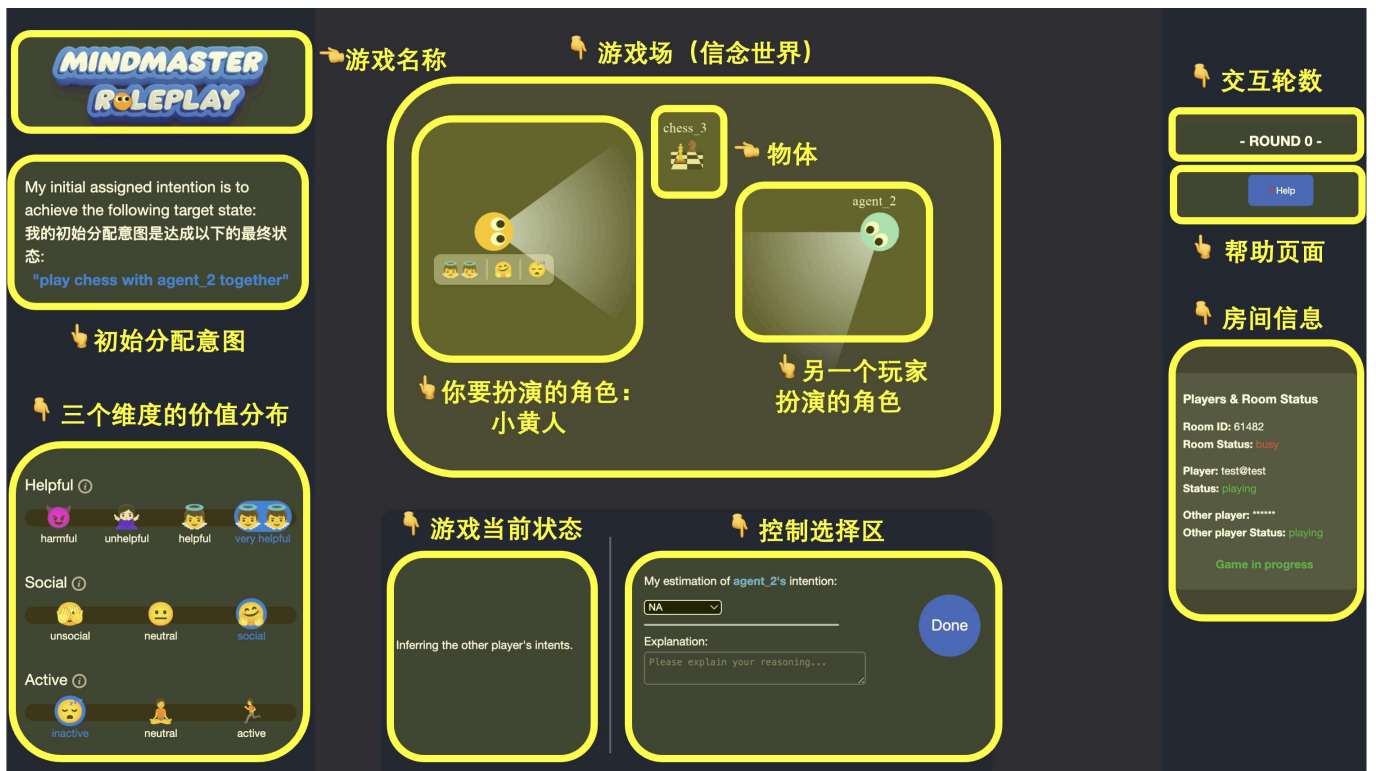

## 游戏概览

### 01 游戏界面介绍

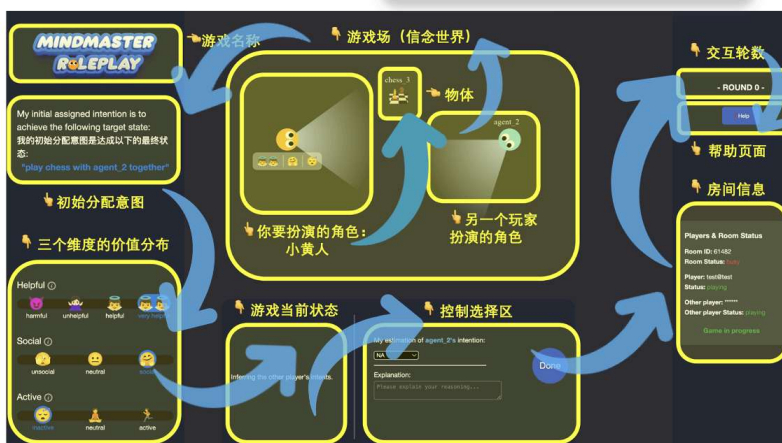

- 扮演的角色“小黄人”
- 物体
- 动作
- 信念世界
- 初始分配意图
- 三个维度的价值分布
- 游戏当前状态栏
- 控制选择区
- 房间信息
- 交互轮数
- 帮助页面

黄色的智能体是你需要控制和扮演的角色，我们用“小黄人”来指代。

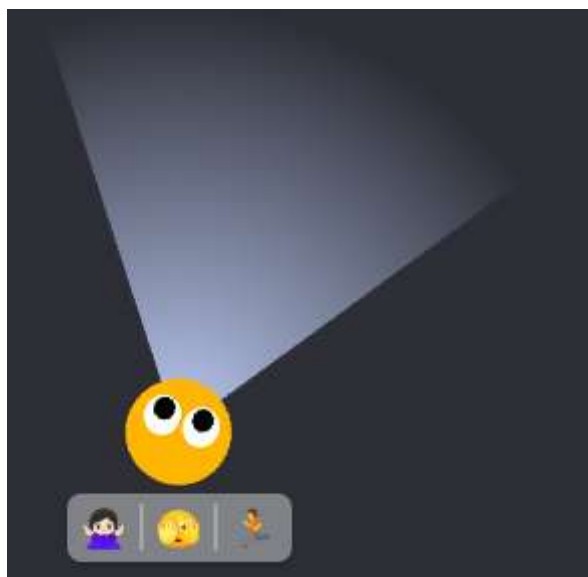

图中的扇形表示智能体的注意力方向和视野范围。

虽然图中只绘制了一个扇形，但实际上，**智能体的注意力覆盖了两条射线之间的整个区域，并且可以看到视线范围内尽可能远的目标。**

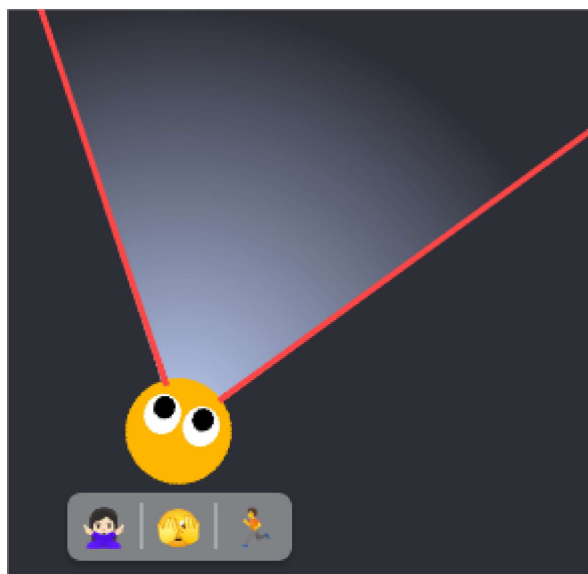



图中的**三个表情**从左到右依次代表智能体在“helpful”、“social”和“active”这三个**价值**维度上的状态。

具体地，左边表情代表“helpful”这一维度，表示智能体是否“乐于助人”；

中间表情代表“social”这一维度，表示智能体是否“社交外向”；

右边表情代表“active”这一维度，表示智能体是否“活跃好动”。

每个价值维度都有3-4个可能的状态取值，具体的细节我们后面会详细介绍。

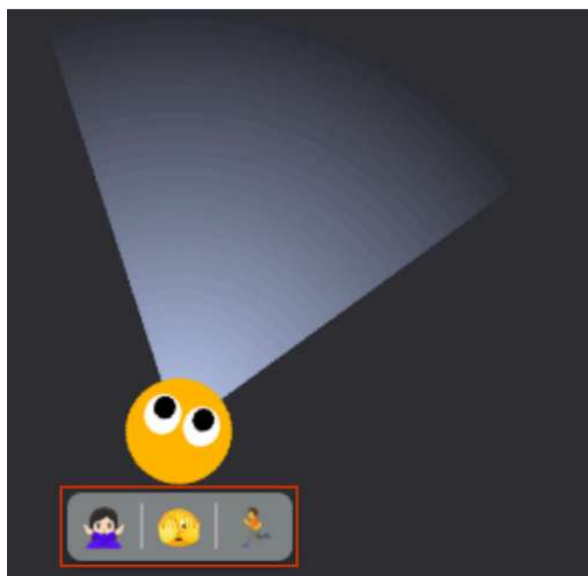

一些物体会在场景中随机出现，为了帮助你辨别它们，我们在这里首先向你展示一下都有哪些物品。

注意：在前两行的物体中，**哑铃是最重的物体**。

|                                                                                                        |                                                                                                                    |                                                                                                                   |                                                                                                          |
|--------------------------------------------------------------------------------------------------------|--------------------------------------------------------------------------------------------------------------------|-------------------------------------------------------------------------------------------------------------------|----------------------------------------------------------------------------------------------------------|
|  <p>Banana<br/>香蕉</p> |  <p>Cup<br/>杯子</p>                |  <p>Key<br/>钥匙</p>               |  <p>Timer<br/>计时器</p> |
|  <p>Books<br/>书</p>   |  <p>Dumbbell<br/>哑铃</p>           |  <p>Chess<br/>棋</p>            |                                                                                                          |
|  <p>Table<br/>桌子</p> |  <p>Closed Cabinet<br/>关闭的柜子</p> |  <p>Open Cabinet<br/>打开的柜子</p> |                                                                                                          |

一些物体会在场景中随机出现，为了帮助你辨别它们，我们在这里首先向你展示一下都有哪些物品。

|                                                                                                                               |                                                                                                                                 |                                                                                                                               |
|-------------------------------------------------------------------------------------------------------------------------------|---------------------------------------------------------------------------------------------------------------------------------|-------------------------------------------------------------------------------------------------------------------------------|
|  <p>Open Box<br/>打开的盒子</p>                   |  <p>Closed Box<br/>关闭的盒子</p>                  |                                                                                                                               |
|  <p>Open and Unlocked Box<br/>打开且没有上锁的盒子</p> |  <p>Closed and Unlocked Box<br/>关闭但没有上锁的盒子</p> |  <p>Closed and Locked Box<br/>关闭且上锁的盒子</p> |

场景中可能随机出现墙，小黄人不可以直接穿越，且它会遮挡小黄人的视野。

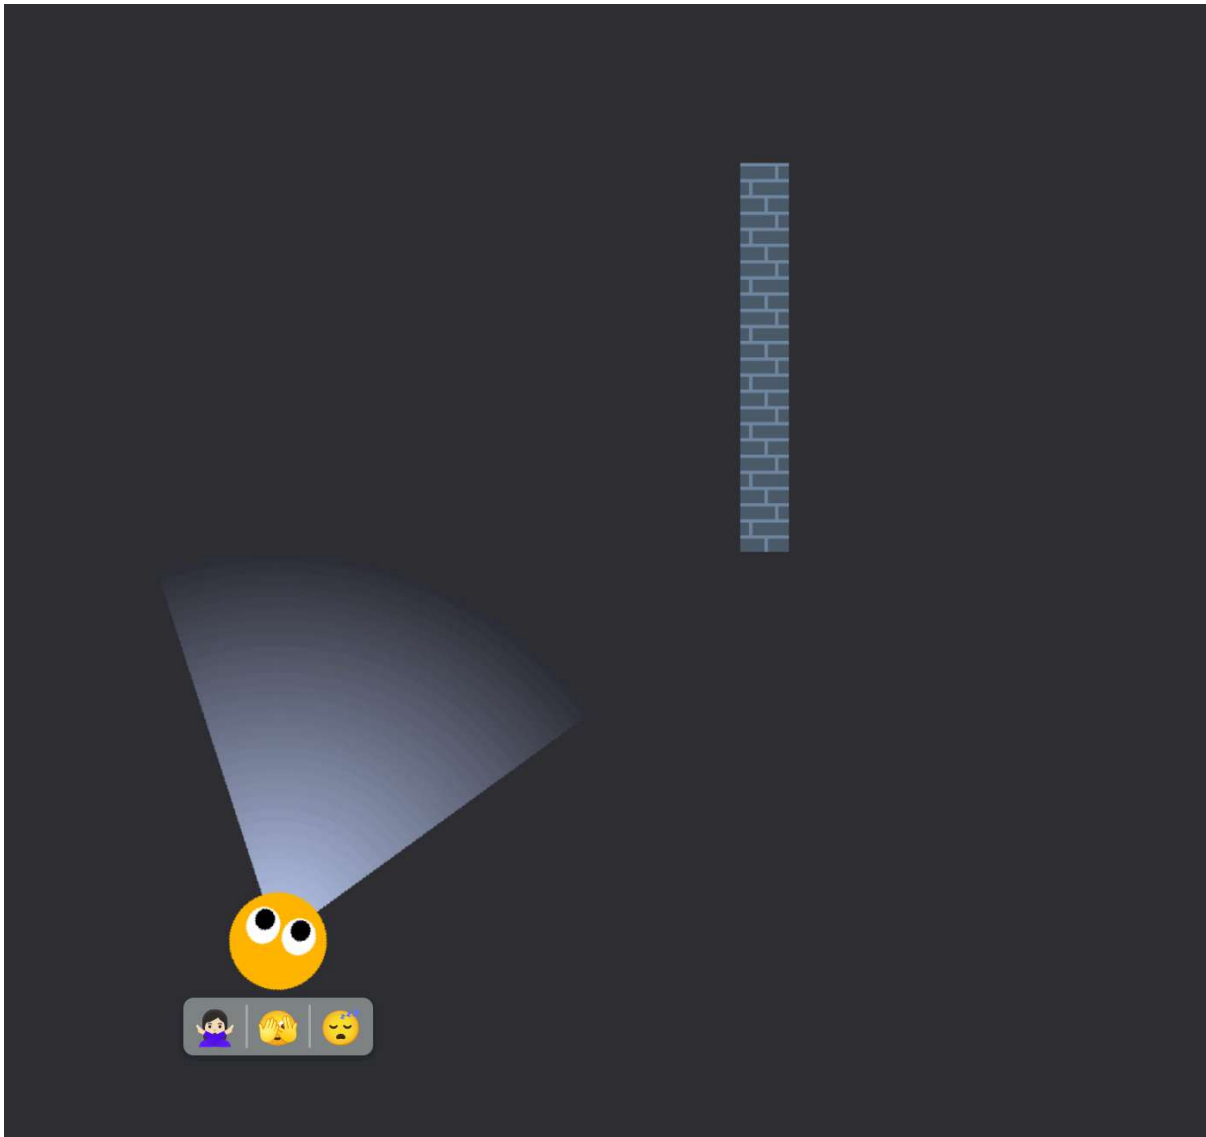

接下来，我们会介绍游戏中的10个动作。每一个用时大约5秒，一共需要大约50秒。剩余未介绍的动作可以点击游戏界面右上角的“? Help”帮助界面获取。

## **action - 1**

["Speak", "Hello"] : Speak "Hello".

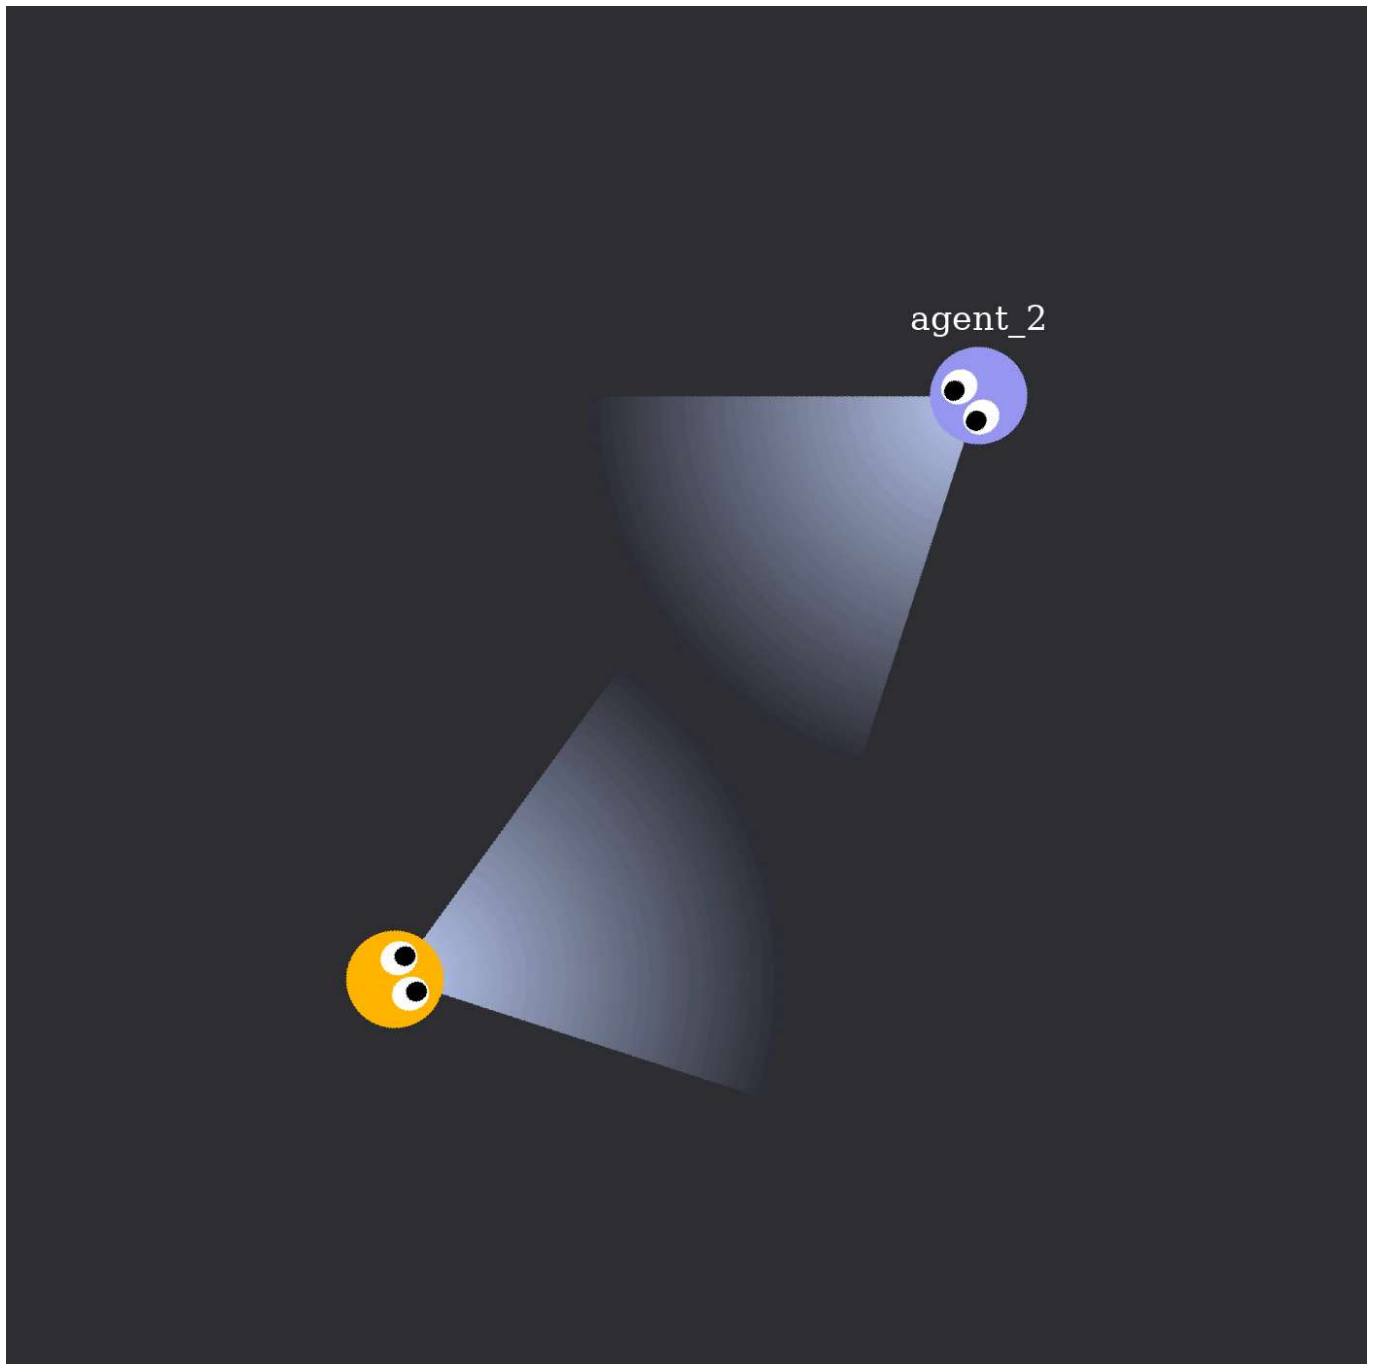

## action - 2

["Grab", "chess\_3"] : Grab chess\_3. (拿起 chess\_3)

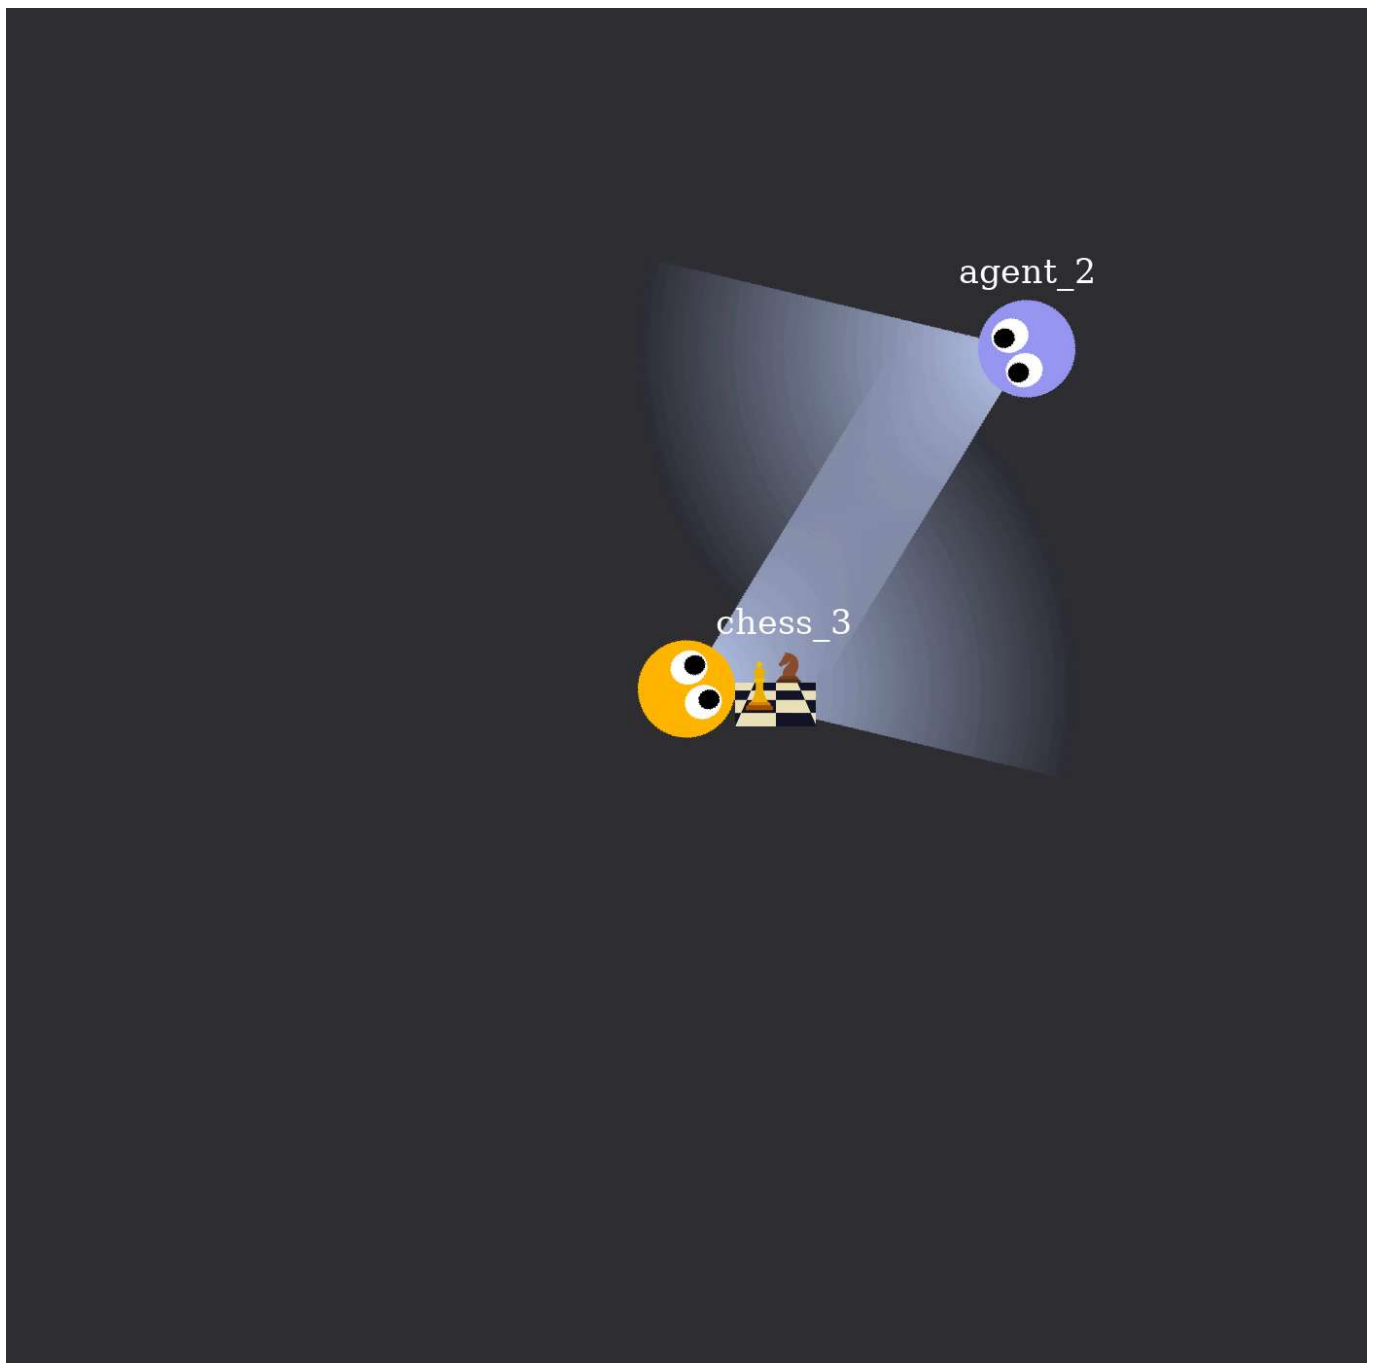

### **action - 3**

["Put...Down", "cup\_3"] : Put cup\_3 down on the ground.  
(把 cup\_3 放在地上)



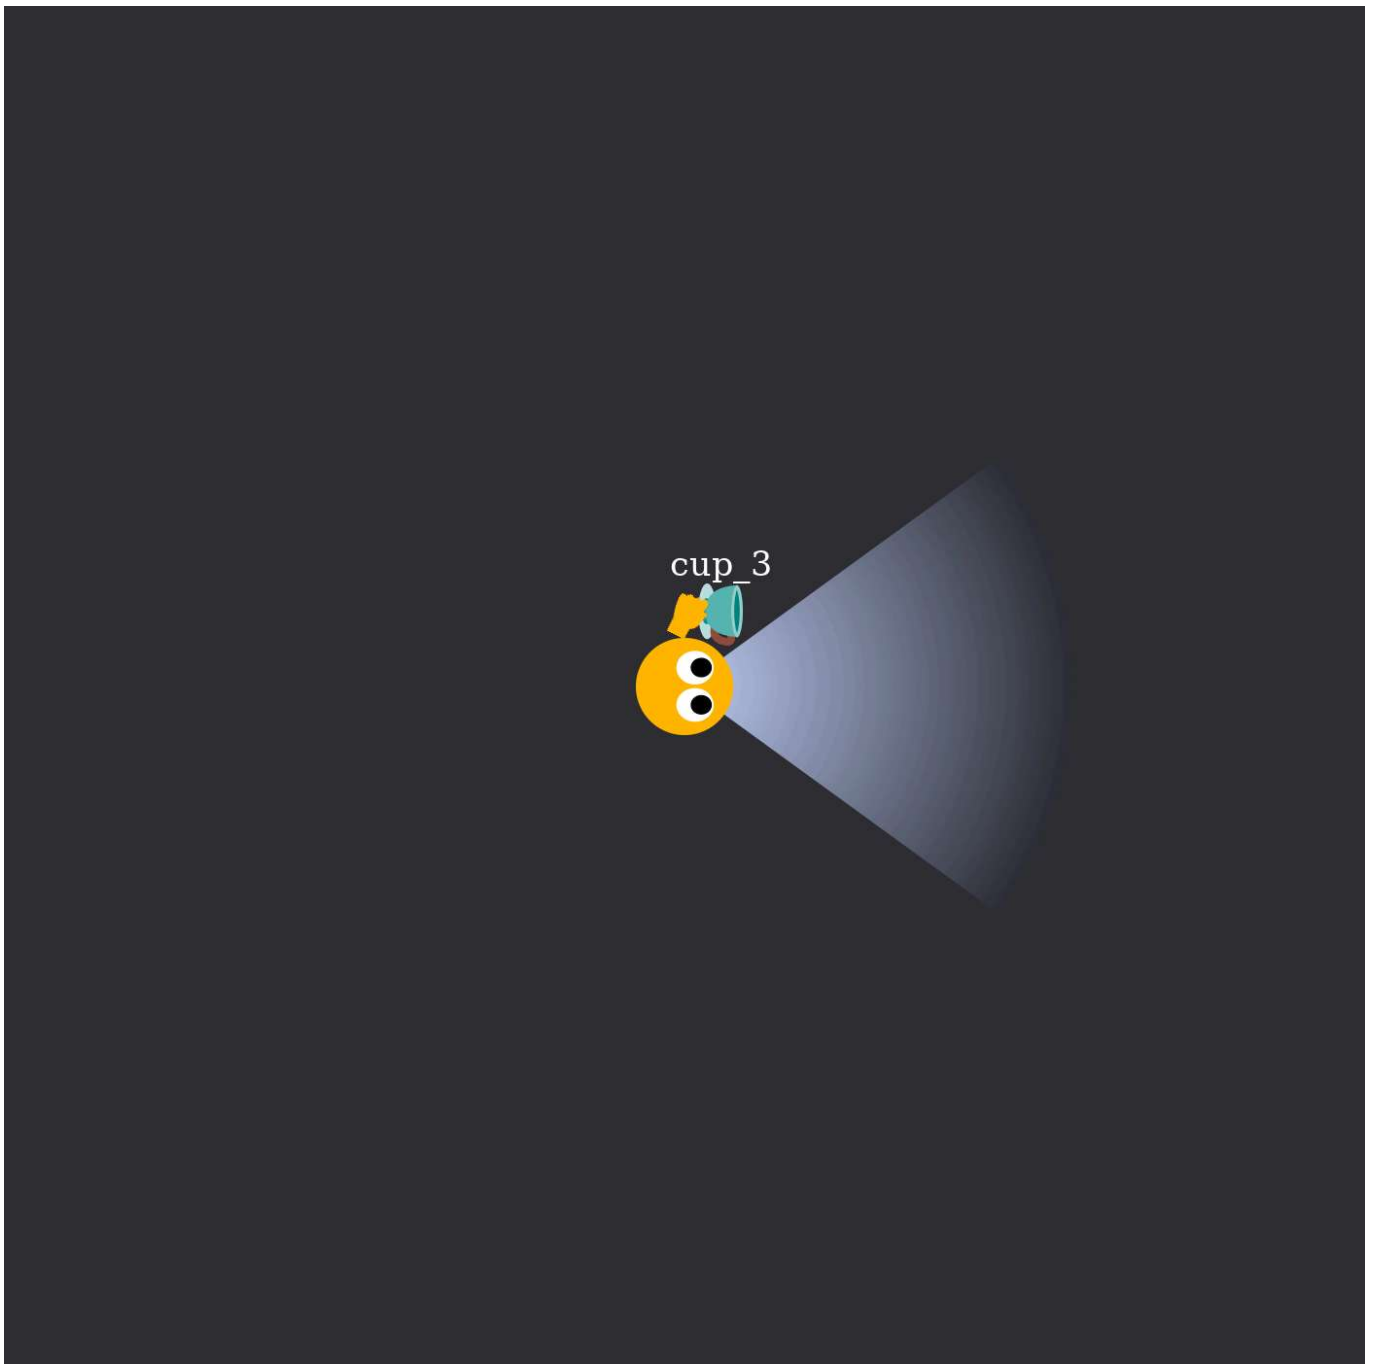

## **action - 4**

["Give...To...", "dumbbell\_3", "agent 2"] : Give dumbbell\_3 to agent\_2.

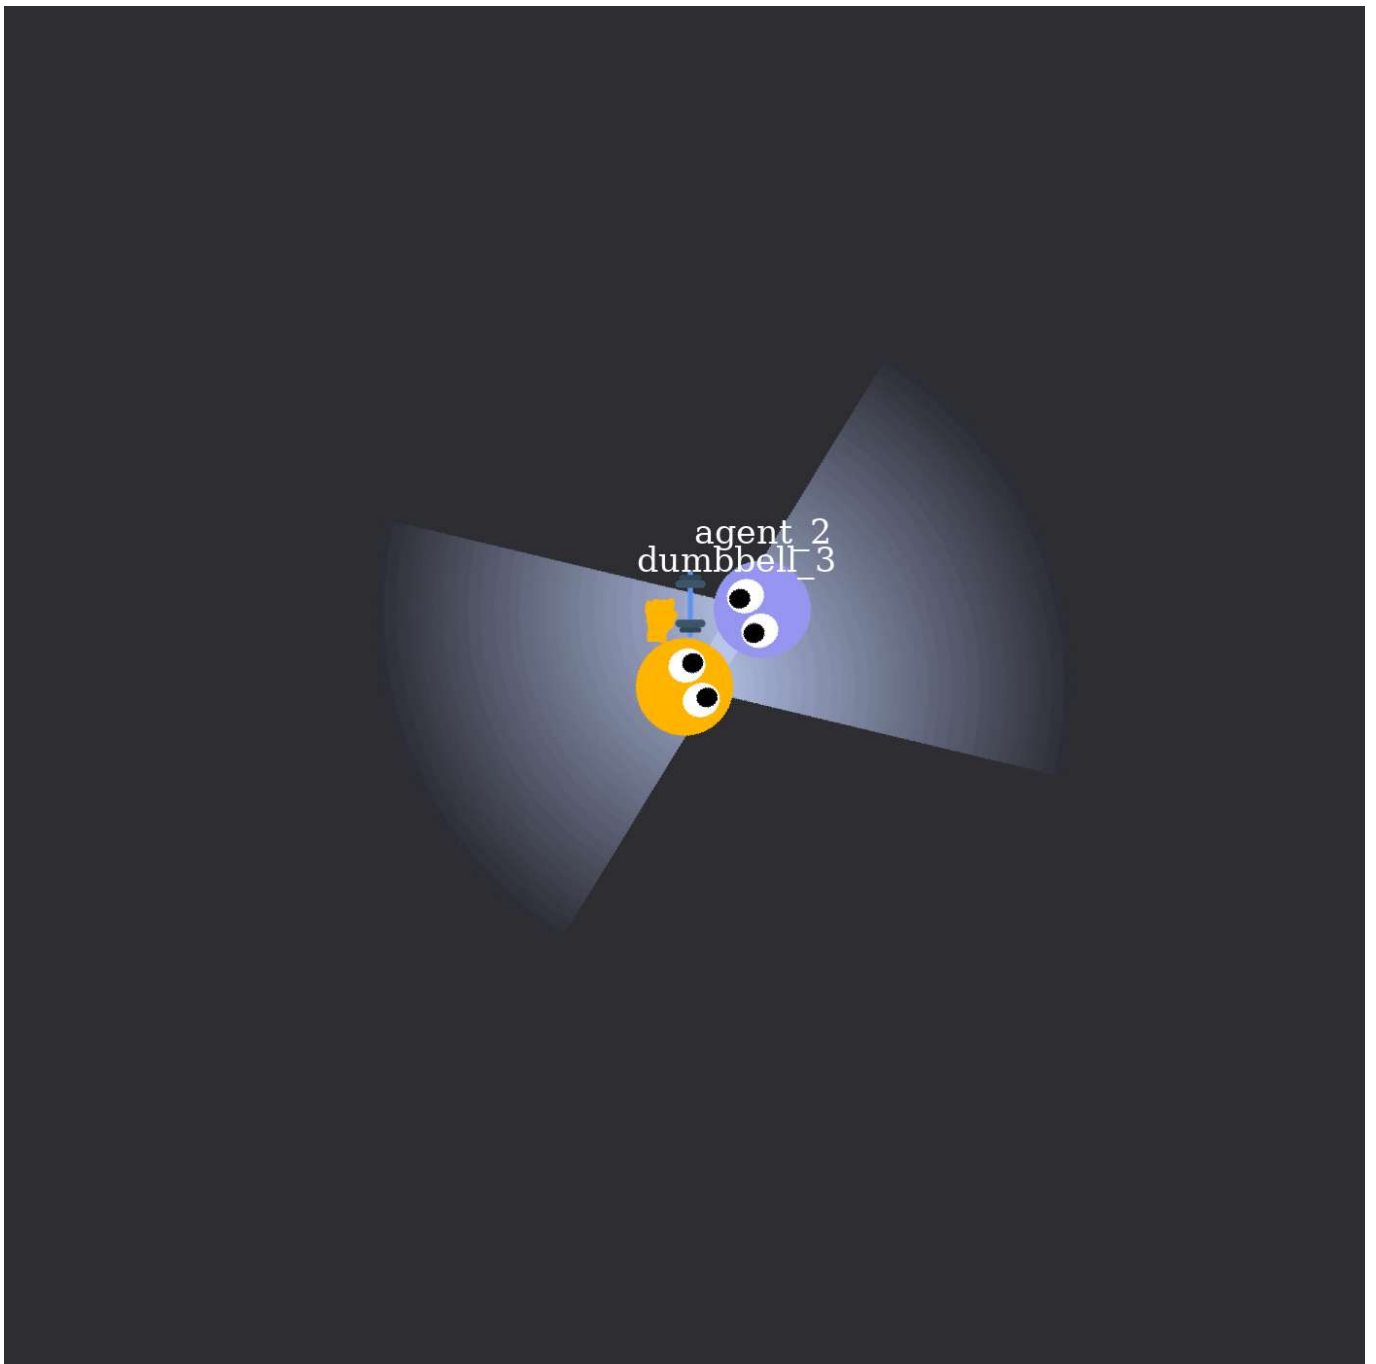

## action - 5

["Smash", "cup\_3"] : Smash cup\_3. (摔碎 cup\_3)

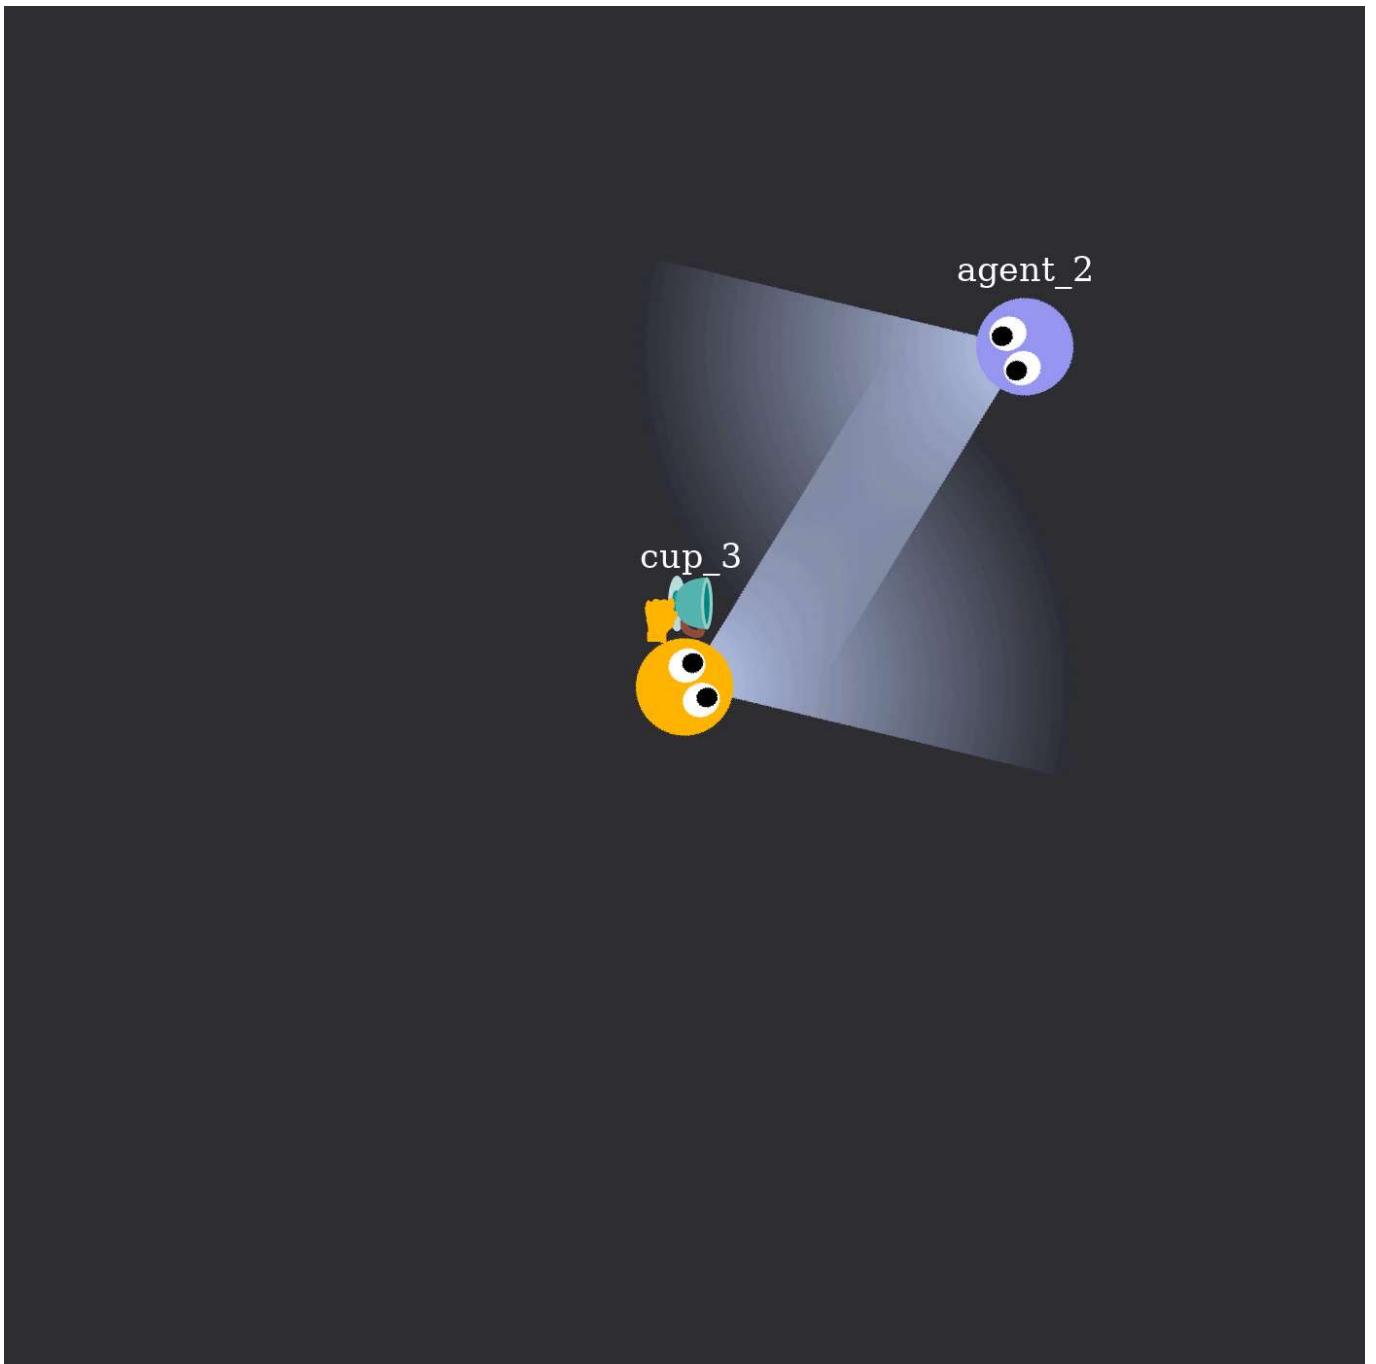

## action - 6

["Eat", "banana\_3"] : Eat banana\_3.

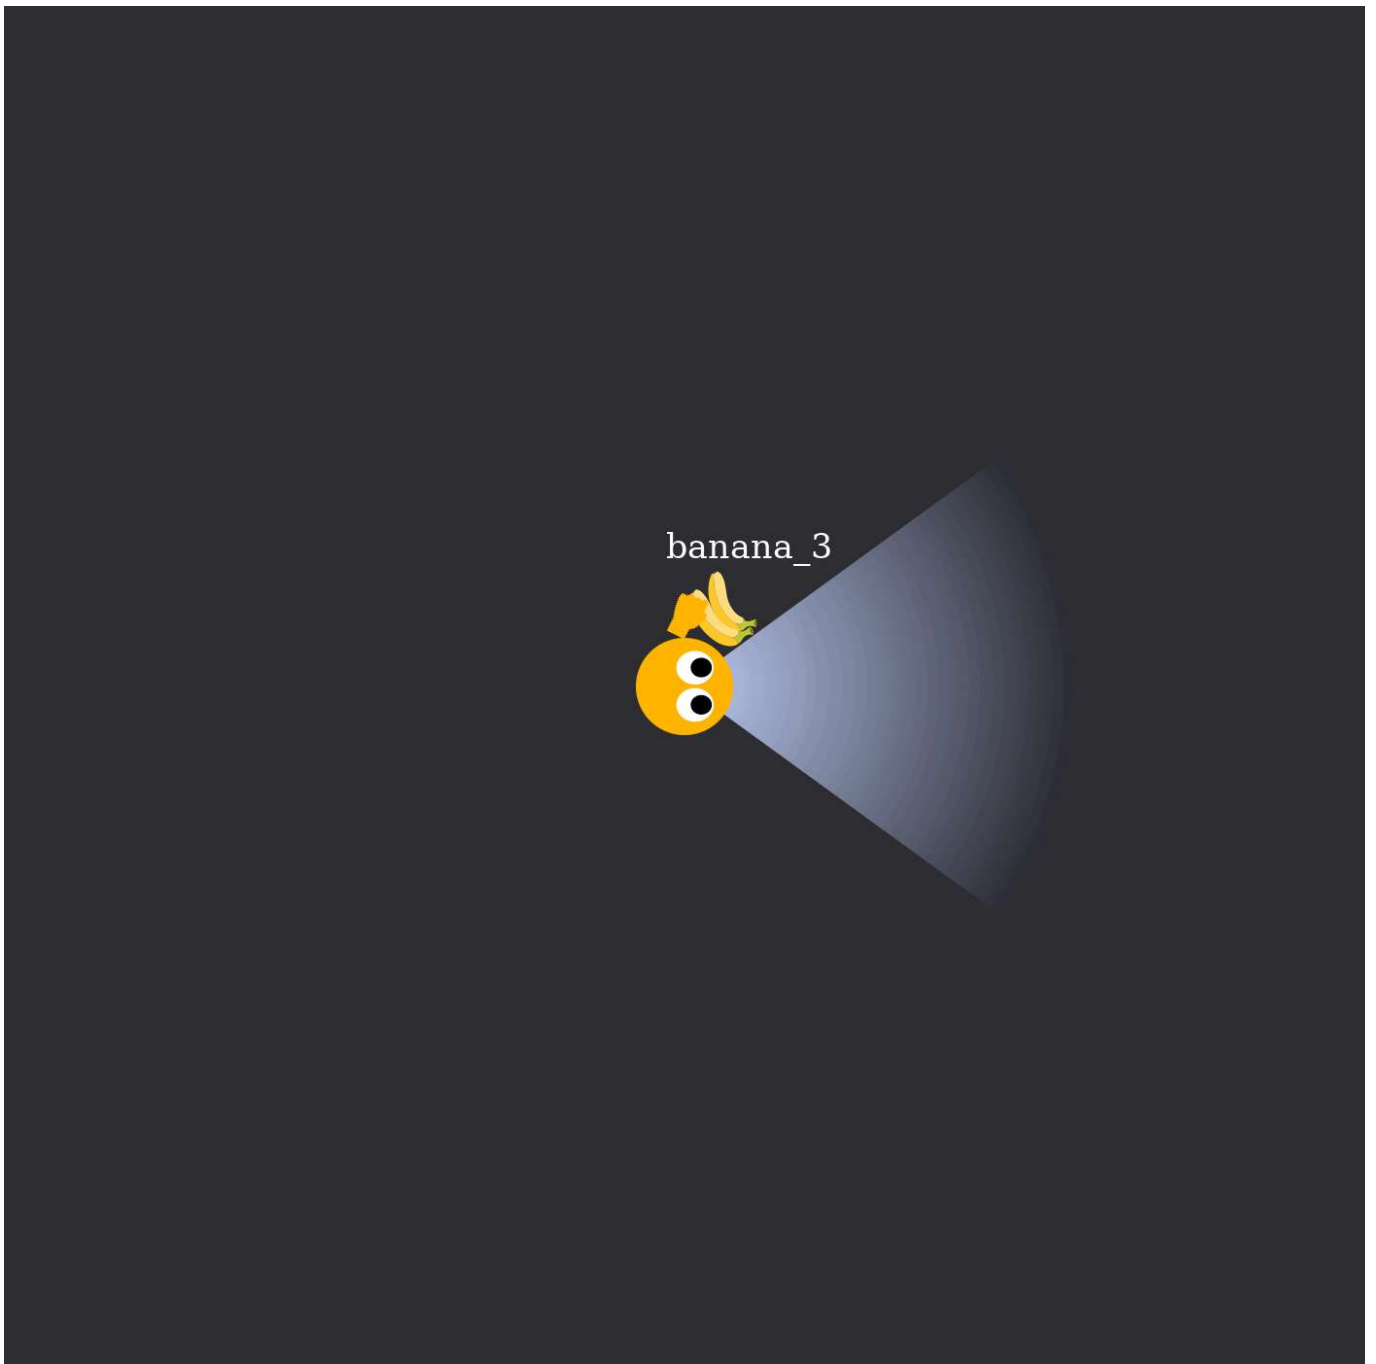

## **action - 7**

["MoveToAttention", "agent\_2"] : Move to agent\_2's attention field.

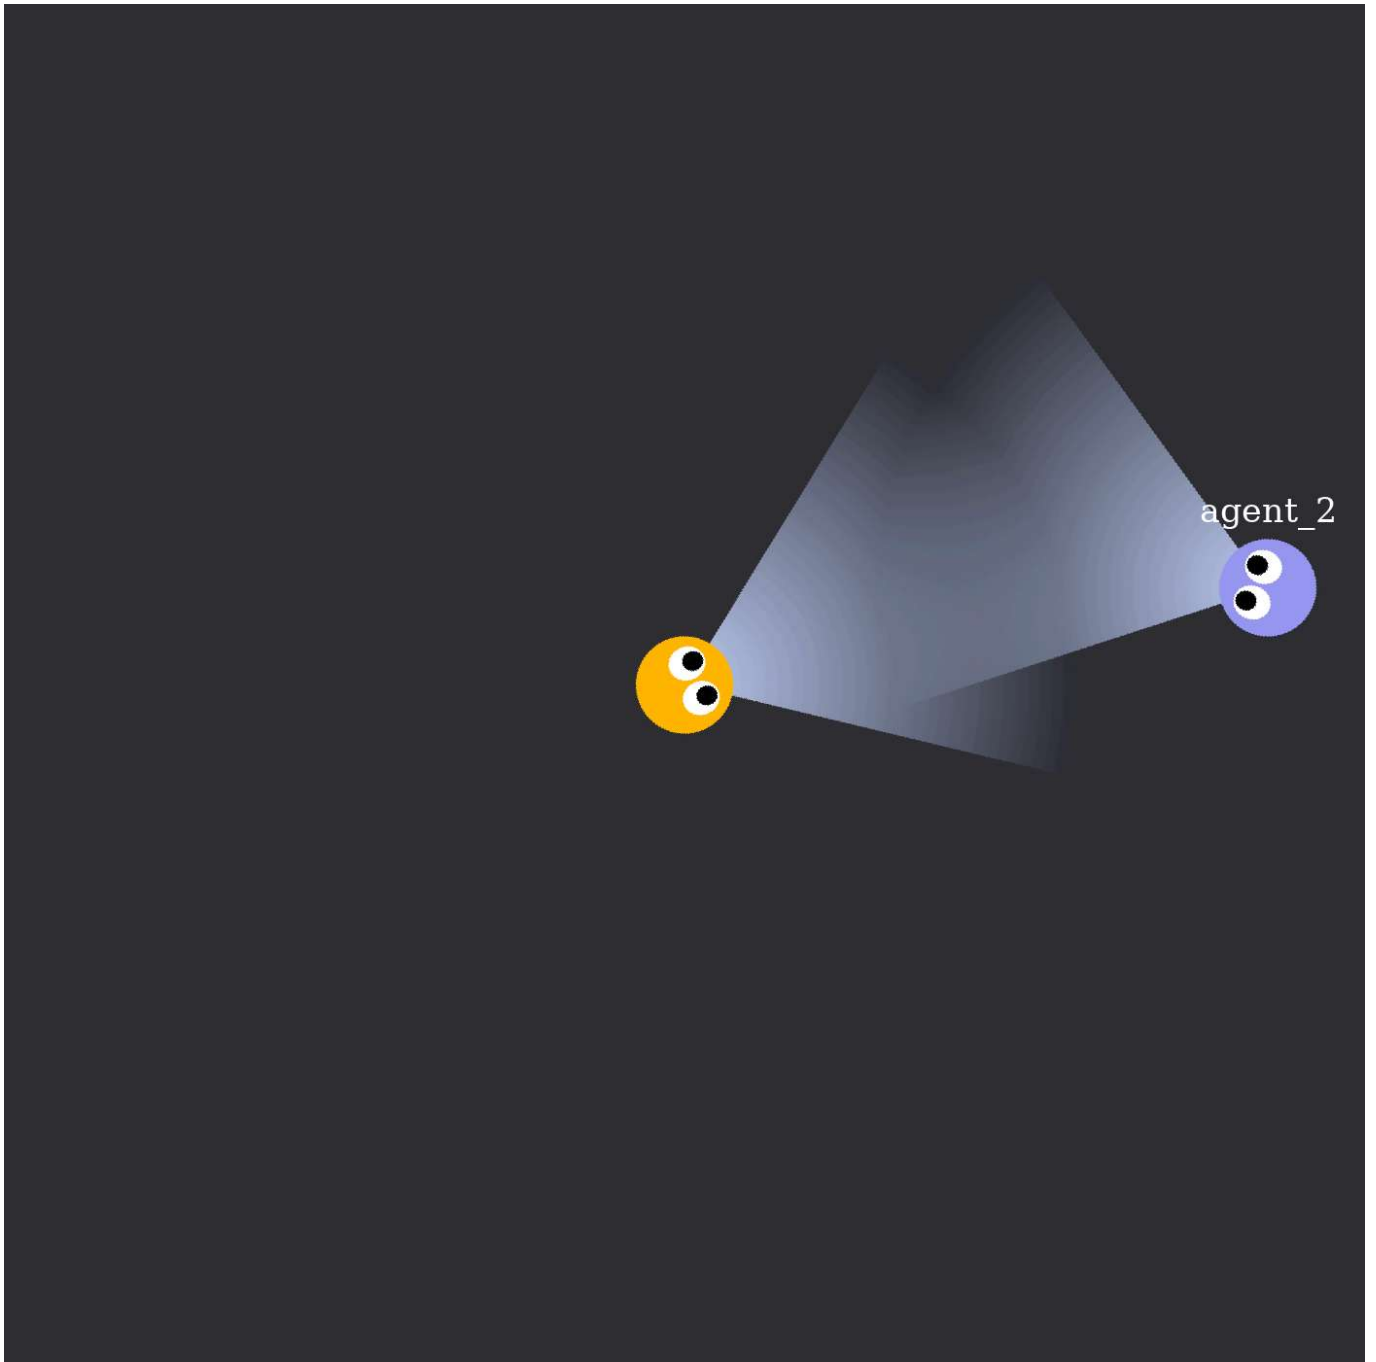

## **action - 8**

["FollowPointing", "agent\_2"] : Follow agent\_2's pointing (to the target shelf\_3).

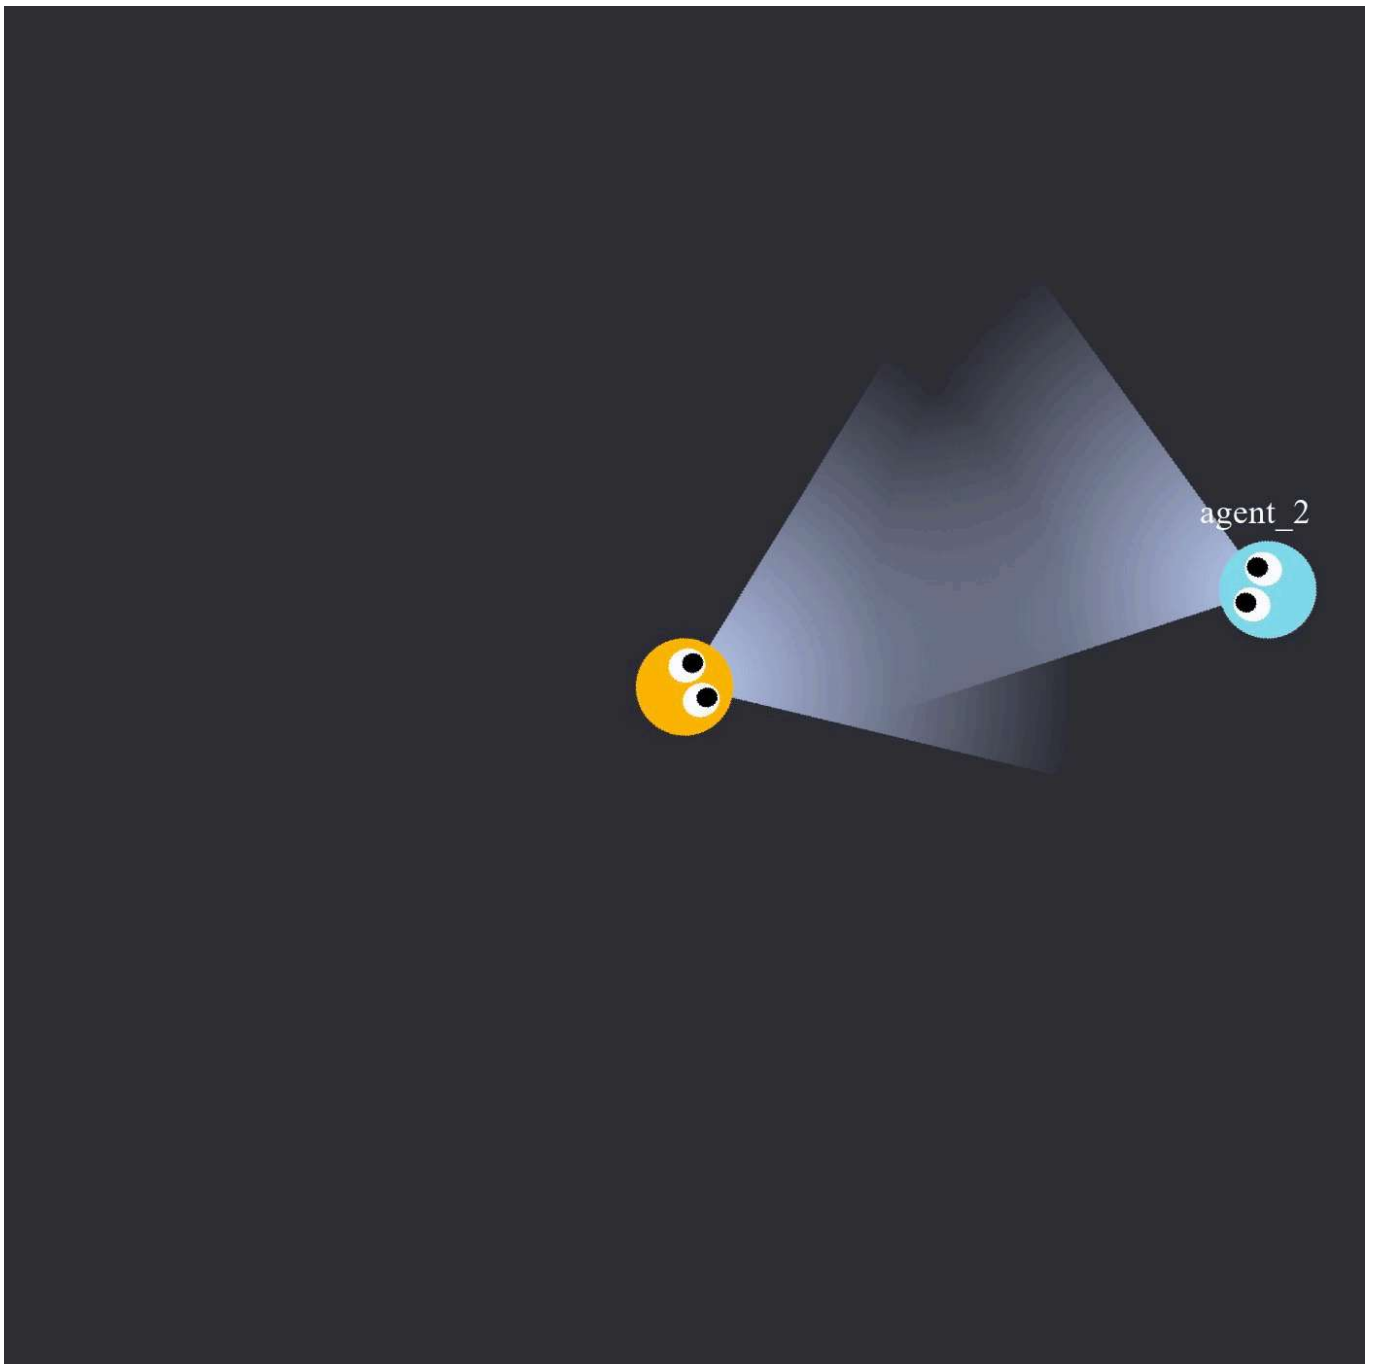

## **action - 9**

["Perform", "eat"] : Perform eat.



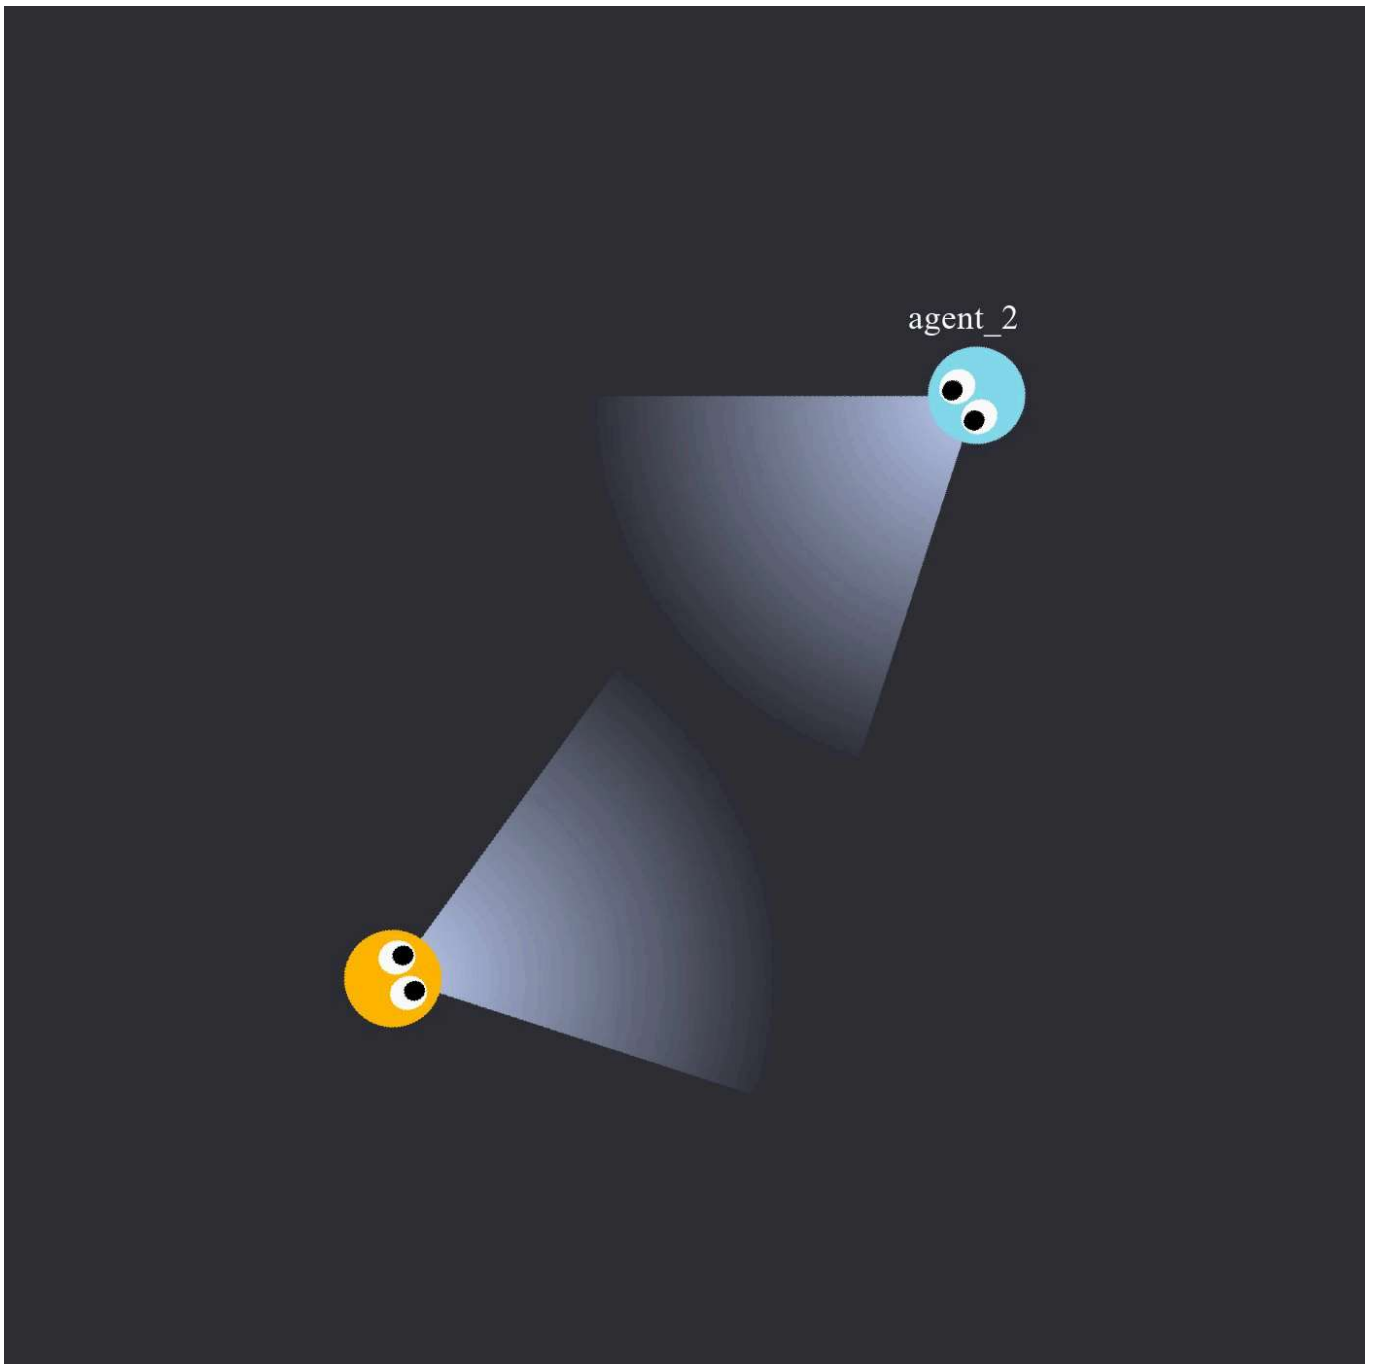

## **action – 10**

["Perform", "drink"] : Perform drink.

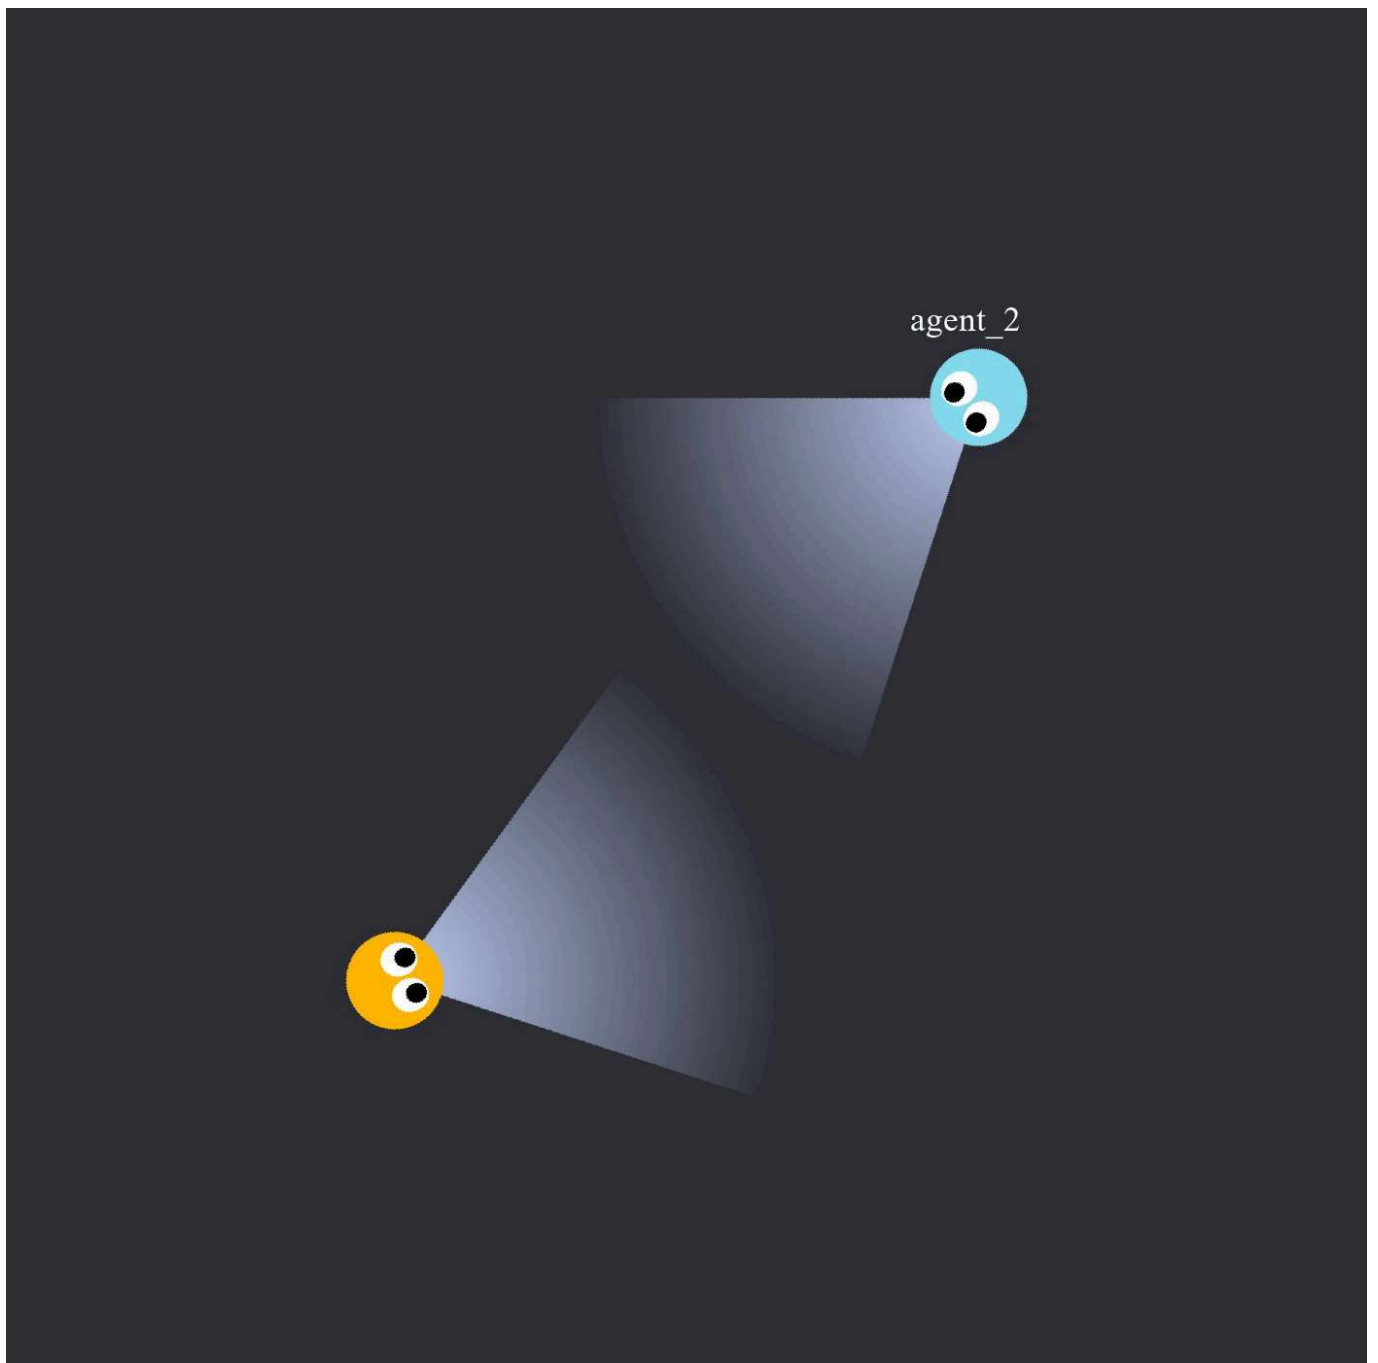

注意：

1. 智能体的**手里可以同时拿多个物体**，在手里已经有物体的情况下依然可以继续拿取（“Grab”）新的物体；

2. 容器（Container，比如box和shelf）里**可以同时放多个物体**。

## tutorial - 界面2

下图中红框标记的是游戏的房间。注意：图中展示的并不是世界的真实状态，它实际上表示的是小黄人看到和记住的世界，即小黄人的**认知世界（belief world）**。

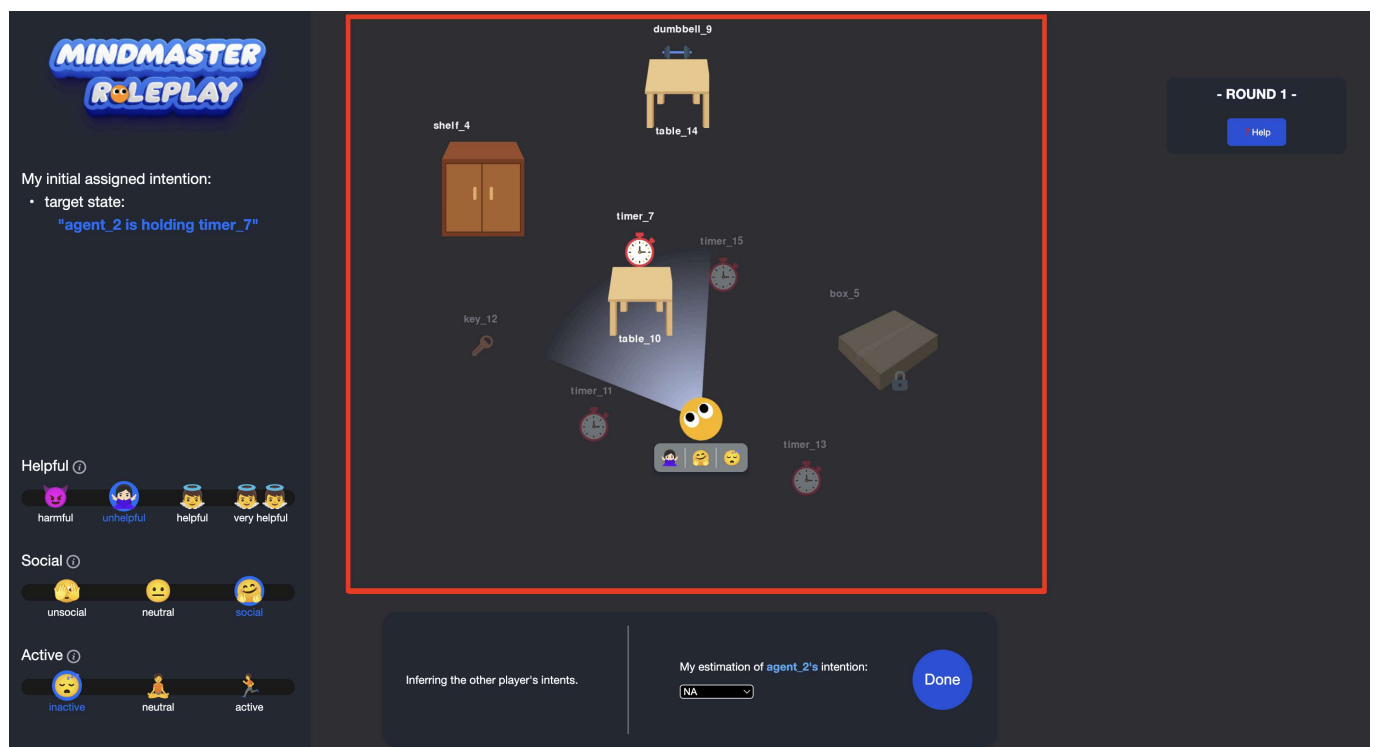

**只有那些小黄人感知到并进入小黄人的信念的物体才会出现在屏幕上**；未出现在屏幕上的物体不一定不存在，它们可能只是尚未被小黄人感知到并进入信念中。

**亮颜色**的物体是小黄人当前看到的，而**半透明**的物体是虽然当前不在小黄人的视野内、但是小黄人之前感知过并在小黄人的信念中的物体。

下面两个视频，上边是真实世界，下边是信念世界，请通过观看视频比较两者的区别。

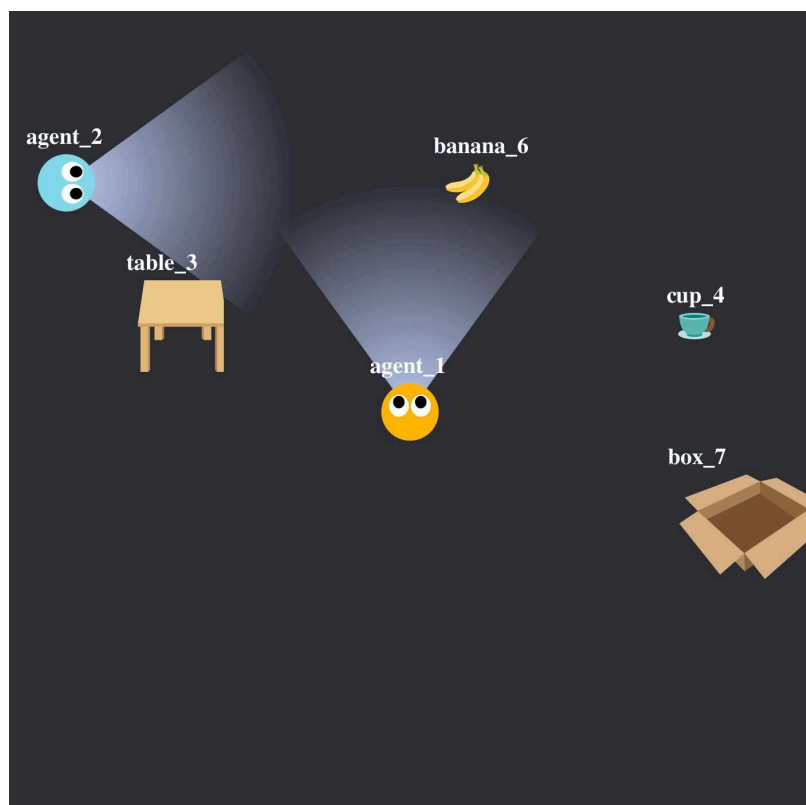

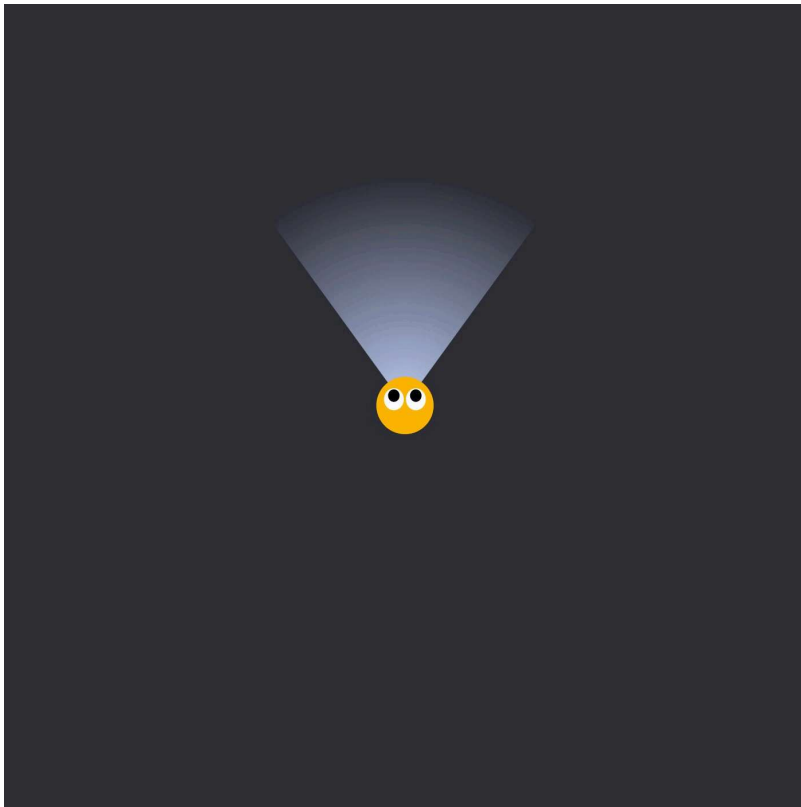

为了方便您理解，您可以想象这是一个**漆黑的房间**，而小黄人**戴着一个探照灯**来探索这个房间，小黄人当下看到的物体会在探照灯下显现出来（亮颜色物体），后面即使不再小黄人看它们，小黄人也会记住它们在房间中的位置和状态（半透明物体）。

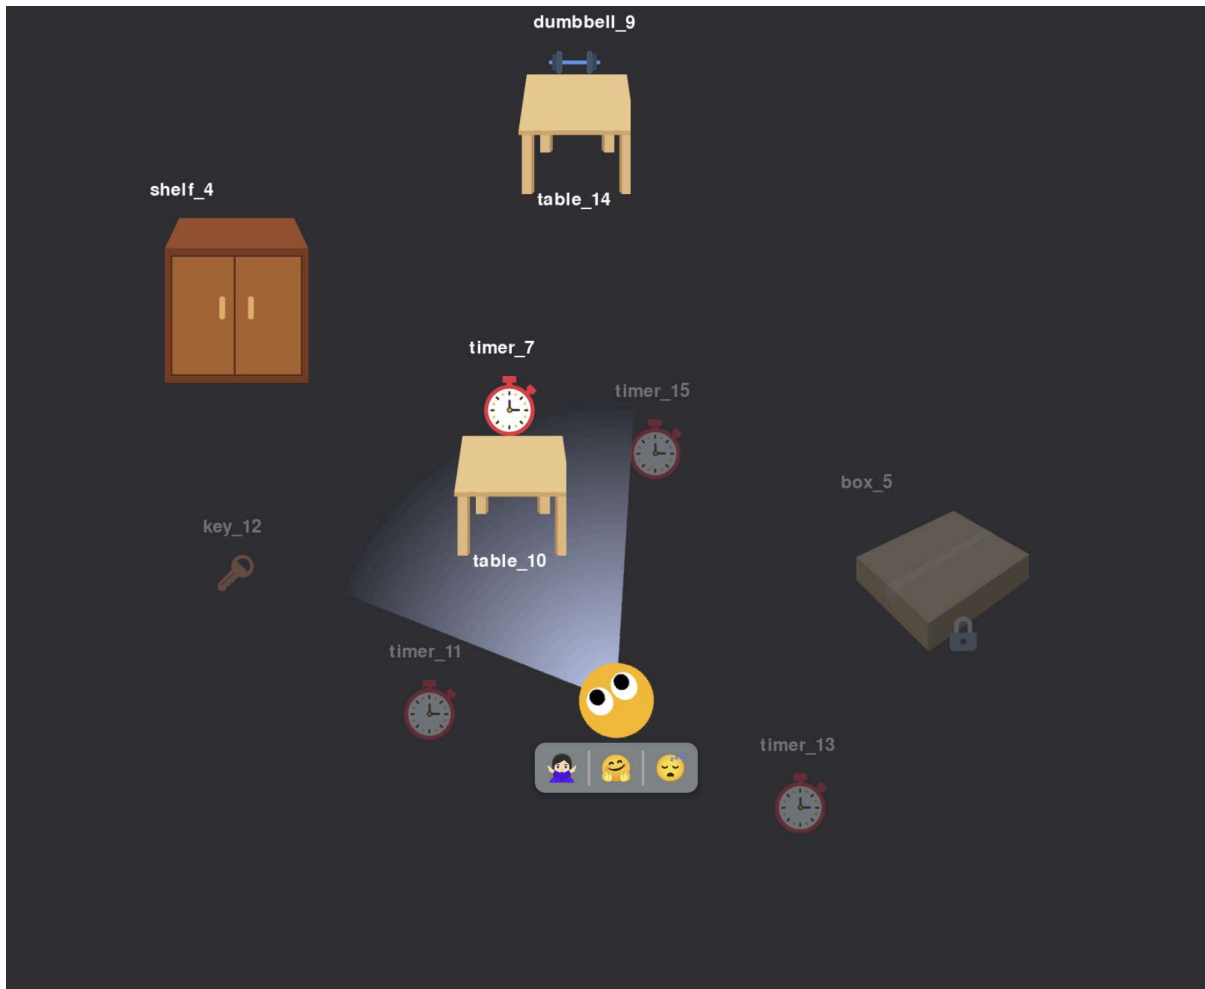

注意：如果一个半透明的物体在小黄人重新看它的时候突然消失了，说明小黄人对于这个物体的信念已经是**错误信念**了，这个物体现在已经不在了。



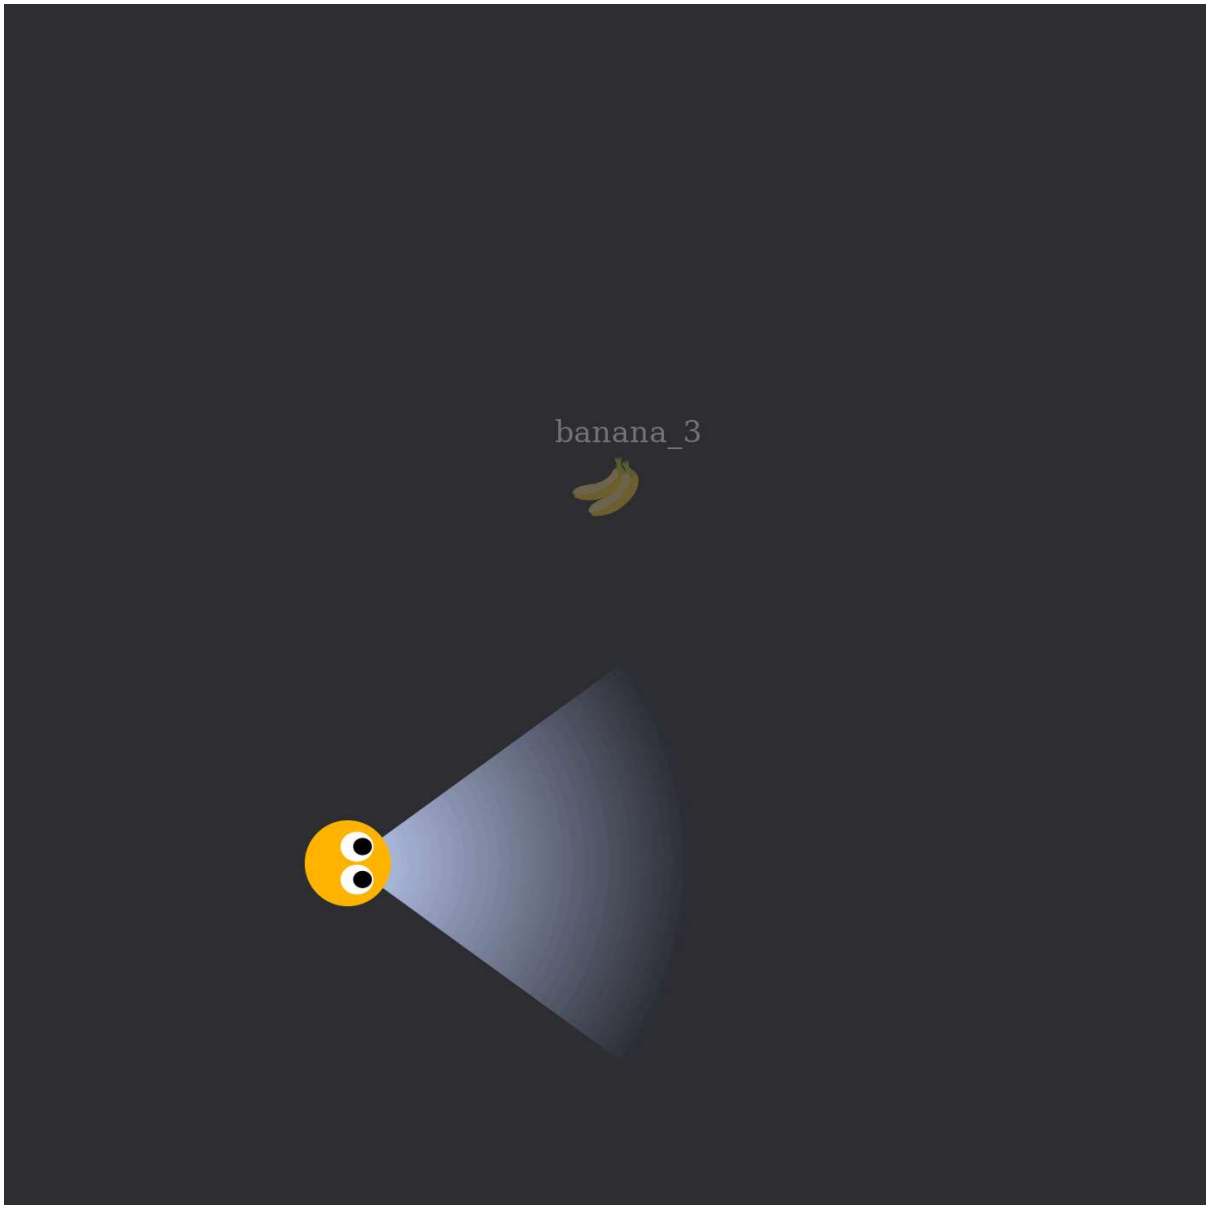

注意：如果您看到您视野中的另一个智能体突然消失，那只是因为他走出了您的视野。

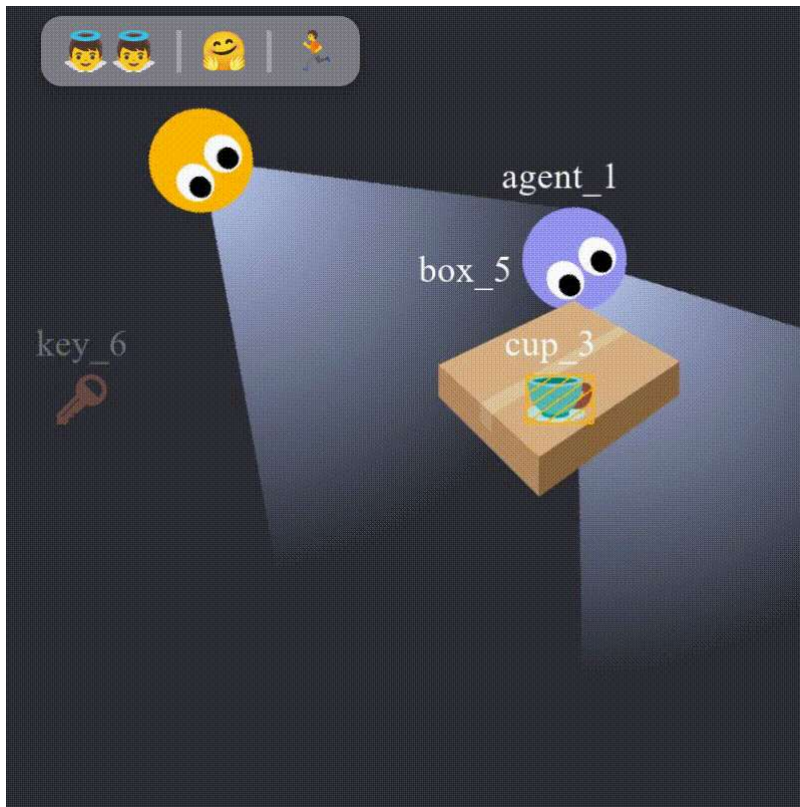

注意：如果你的手里突然多了一个物体，那可能是因为另一个在你视野之外的智能体给你的（例如，在你背后的智能体给你的）。

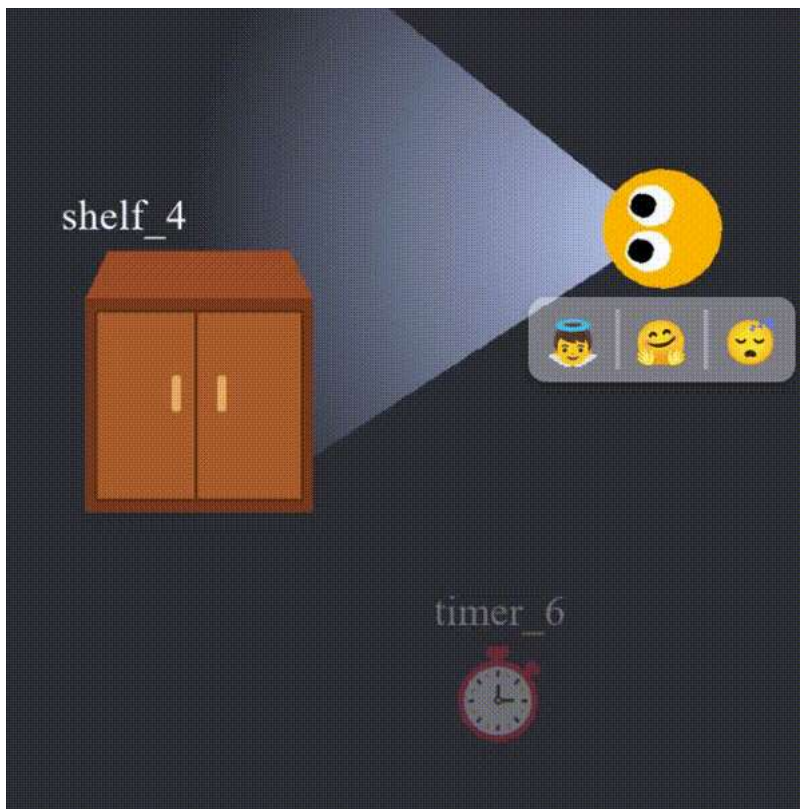

注意：如果你的视野之外突然出现了一个半透明的智能体，可能是因为你听到那个智能体说话，所以知道了那个智能体的存在和他当前的位置。

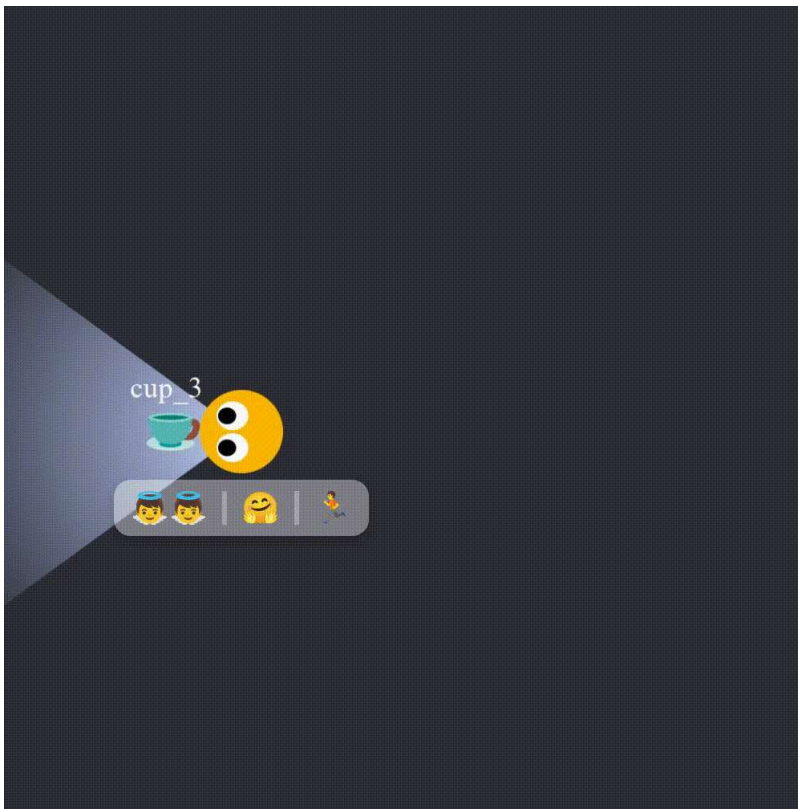

注意：如果你的视野之外突然出现了一个半透明的智能体，可能是因为你听到那个智能体说话，所以知道了那个智能体的存在和他当前的位置。



下图中红框标记的是游戏开始时**分配给小黄人的初始意图所对应的目标状态**。

注意：如果初始意图为“none”，则表示小黄人没有被分配任何初始意图，这时你只需要遵循小黄人的价值分布（下图左下角区域）选择动作；如果初始意图不为None，你需要结合小黄人的价值分布综合考虑如何实现它。

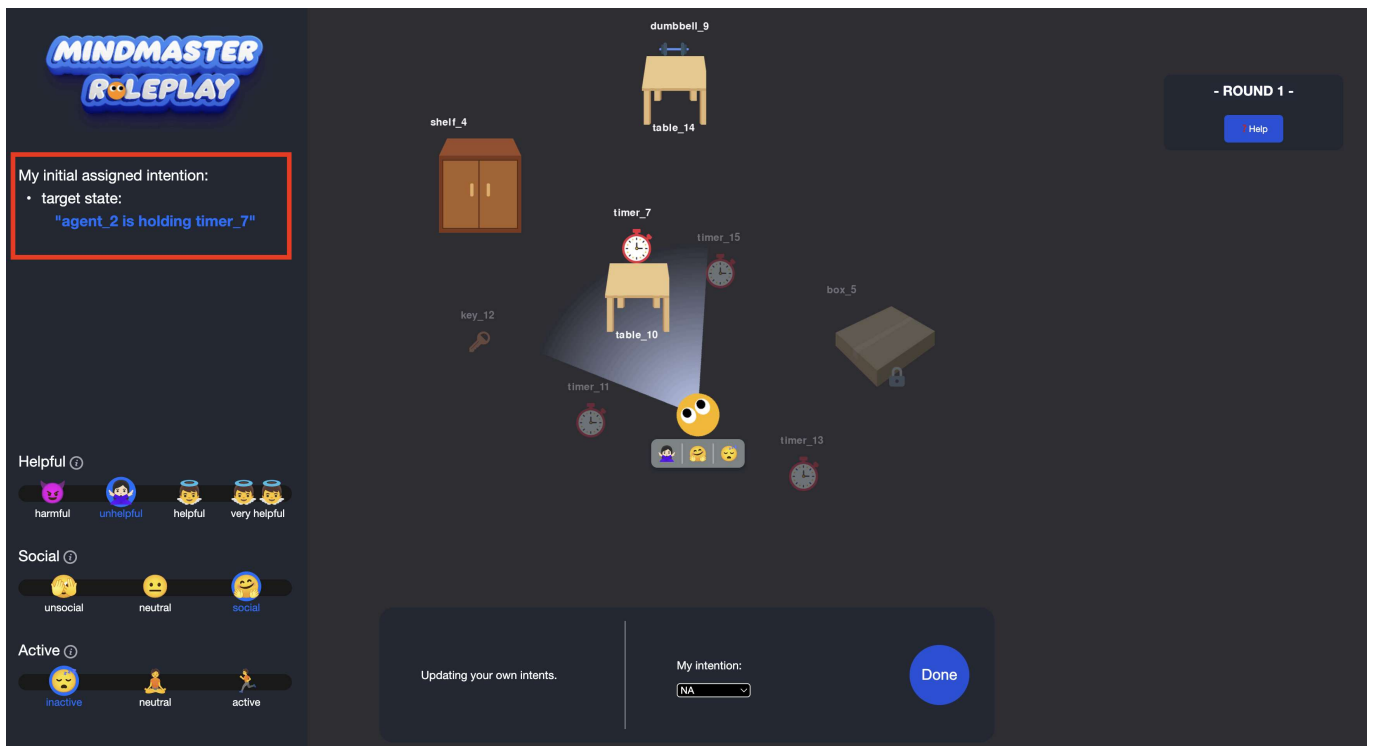

下图中红框标记的是小黄人的价值分布，注意用蓝色高亮出来的是小黄人在对应价值维度上的取值。

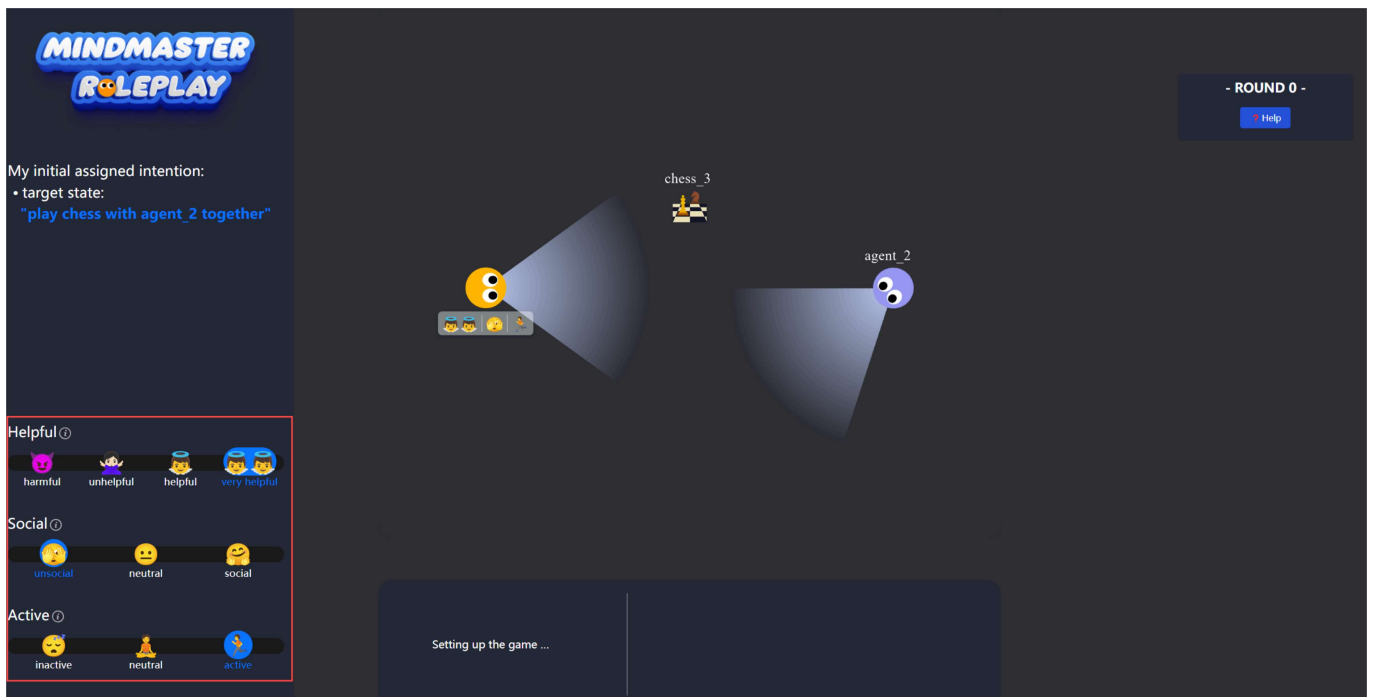

价值的三个维度：

- 1.助人的(Helpful)：是否愿意帮助他人
- 2.社交的(Social)：是否喜欢社交互动
- 3.好动的(Active)：是否喜欢身体活动

对于“助人的”(Helpful)维度，我们有四个取值：“害人的”、“不助人的”、“助人的”和“非常助人的”。

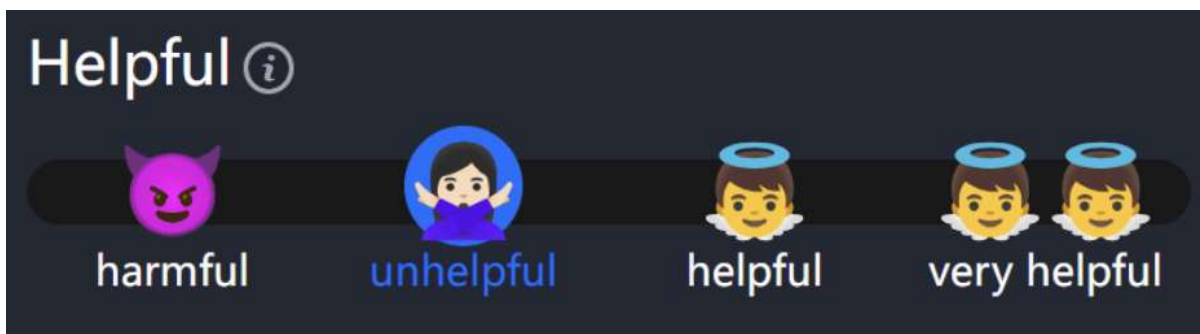

在下面这张图片中，上面的文字代表小黄人在该维度的取值，下面是维度的名称。

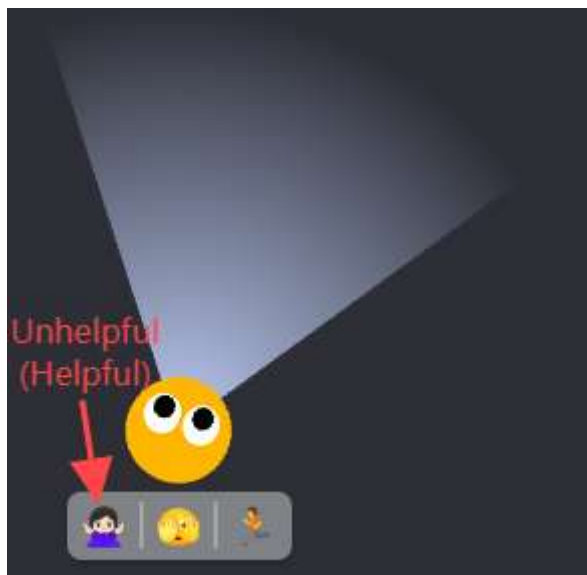

对于“社交的”(Social)维度，我们三个取值：“社恐的”、“中立的”和“社牛的”。

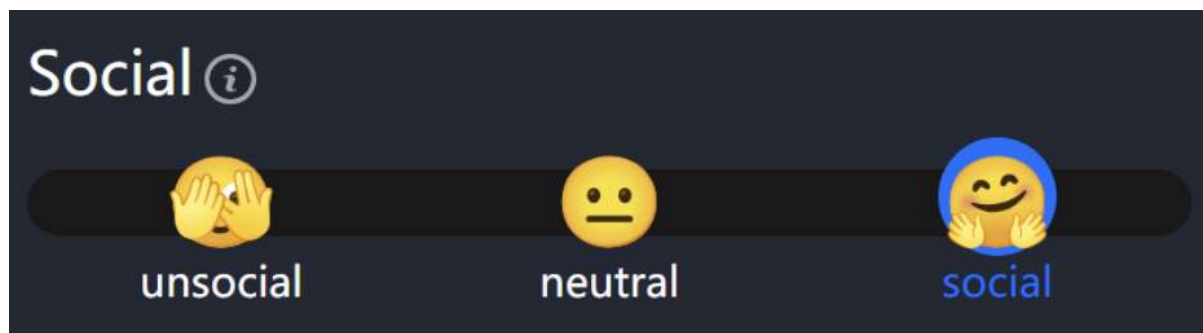



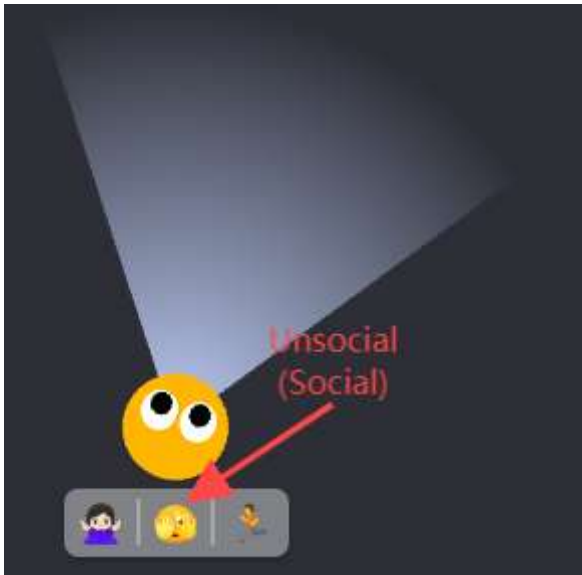

对于“好动的”(Active)维度，我们三个取值：“不好动的”、“中立的”和“好动的”。

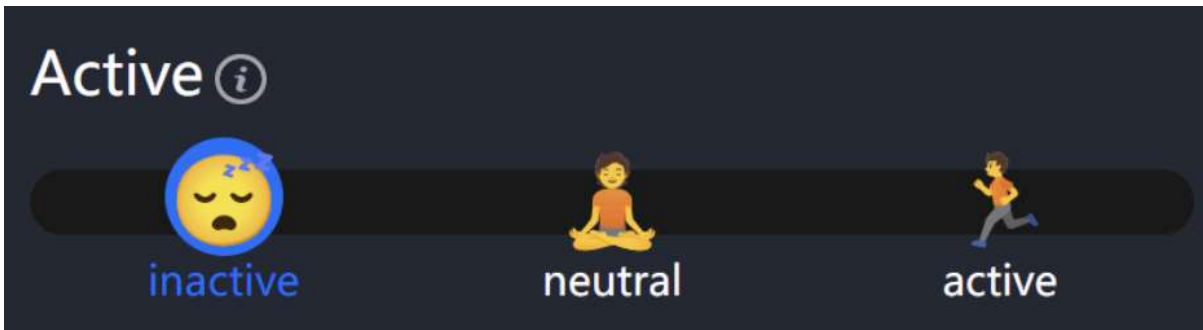

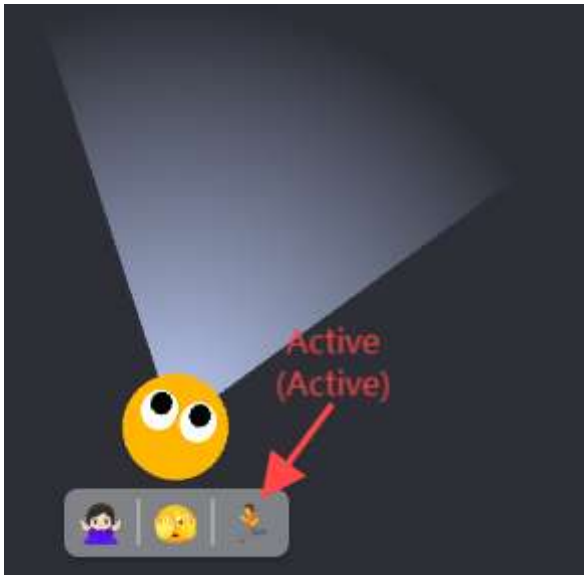

总体价值分布在小黄人旁边的对应位置如下图所示

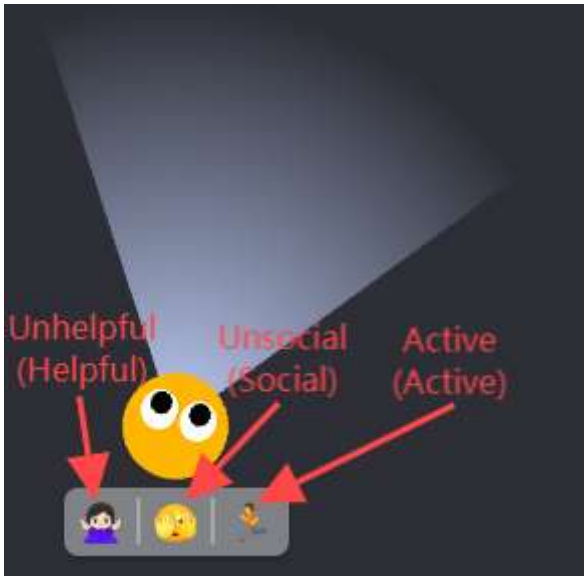

下图中红框标记的是当前的游戏**状态**，这个可以帮助您在每一步的时候了解自己应当做什么。

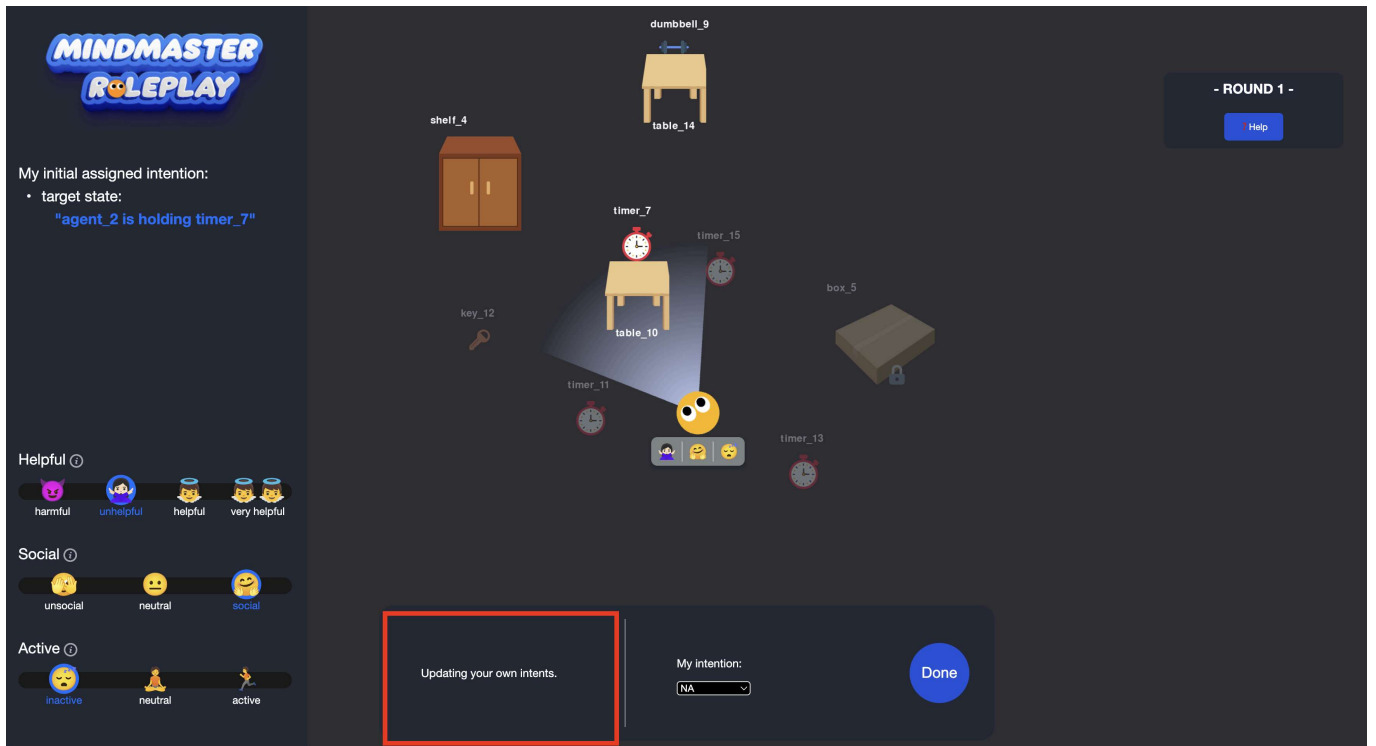

下图中红框标记的是您的**操作区**，您可以根据具体的提示去做出选择，选好之后点击“Next”按钮提交从而进入下一步。

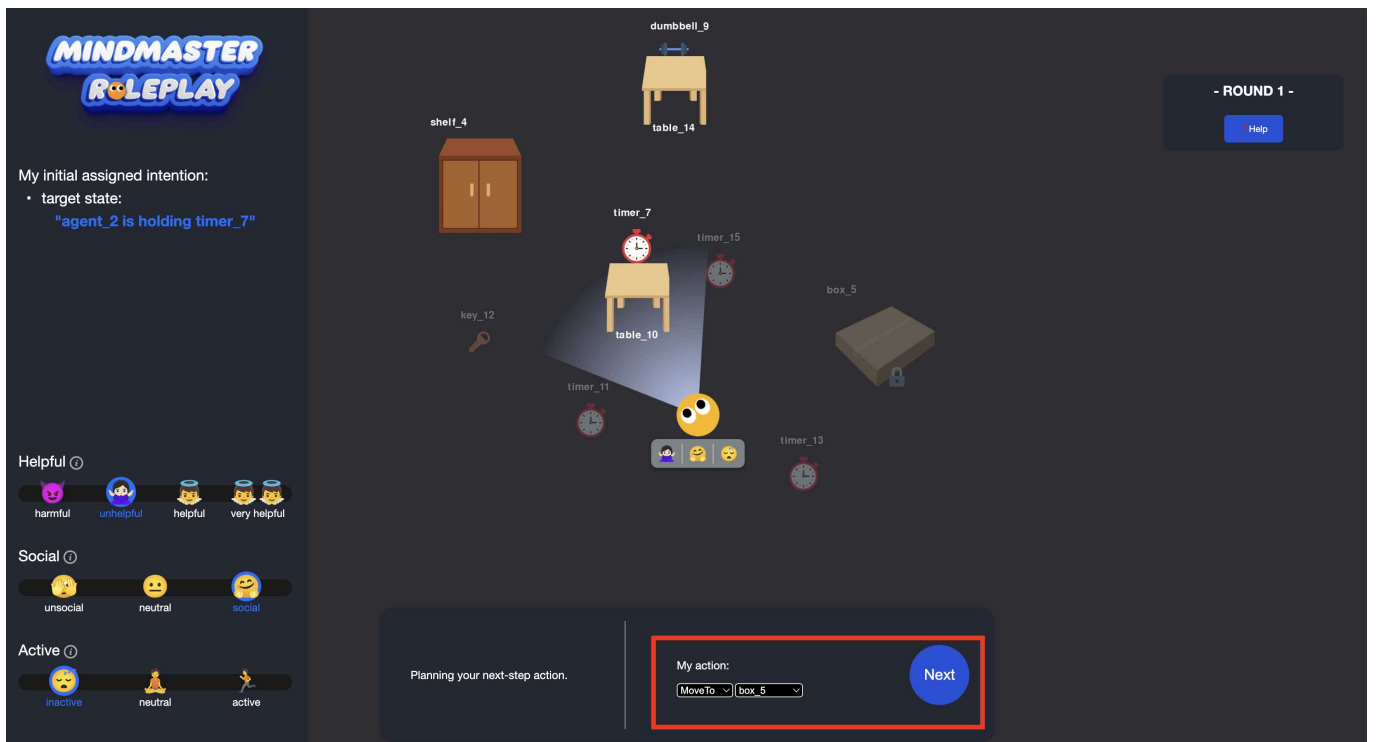

## tutorial-界面3

点击下图中红框标记的"?Help"按钮，会弹出一个wiki页面，里面有关于动作、意图、价值、常见问题等的参考信息。

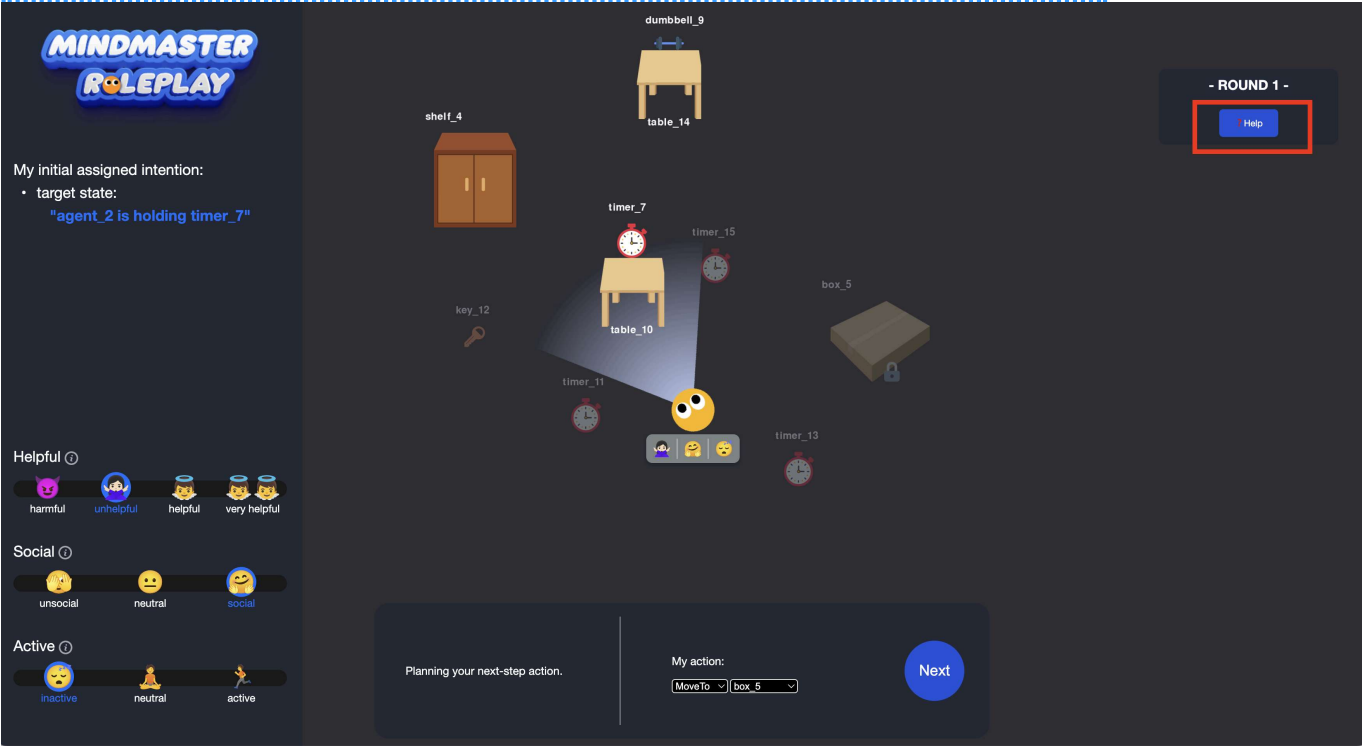

点开之后的wiki 页面包含三部分的说明，分别是动作，意图和价值，以及常见问题，参见上边栏。

All actions

Eat

FollowPointing

Give..To..

Grab

MoveTo

MoveToAttention

NodHead

Open

PointTo

Put..Into..

Put..Onto..

Put..Down

RotateTo

ShakeHead

Smash

Speak

Unlock

WaveHand

PerformEat

All intents

Observe

Give..To..

Get..From..

Find

Open

Put..Into..

Put..Onto..

Play..With..

RespondTo

Inform

Greet

Help

RequestHelp

Harm

All values

Active

Social

Helpful

常见问题

智能体的手里可以同时拿多个物体吗？

容器里可以放多个物体吗？

为什么半透明的物体在我看到它时消失了？

为什么我视野中的智能体突然消失了？

为什么我手里突然多了个物体/观测到物理状态的变化？

为什么我的信念中突然多了个半透明的智能体？

在玩这个游戏的时候我应该专注于完成任务还是要尽可能契合价值？

我应该怎么估计他人的意图？

当我无法估计他人意图时，我该怎么做？

当我觉得他的意图有很多种可能时，我该怎么做？

我该如何更新我的意图？

当我的意图和价值冲突时，我该怎么做？

我该如何自由地移动到任何一个位置？

你可以点击具体的动作、意图或者价值，页面会选中并高亮对应的说明。

All actions

CheckWaving

Eat

FollowPointing

GiveTo

Grab

MoveTo

MoveToAttention

NodHead

Open

PointTo

PutInto

PutOnto

RotateTo

ShakeHead

Smash

Speak

Unlock

WaveHand

PerformEat

All intents

Observe

Give

Get

Find

Open

PutInto

PutOnto

PlayWith

RespondTo

Inform

Greet

Help

RequestHelp

Harm

All values

Active

Social

Helpful

### 游戏概览

---

#### 02 游戏流程介绍

- 估计对方的意图
- 估计对方的价值
- 选择自己的意图（最高层意图）
- 选择自己的动作
- 填写对于以上推理和决策的解释
- 获得奖励的标准

开始游戏后，首先您需要**估计另一个智能体的意图**（如下图）。

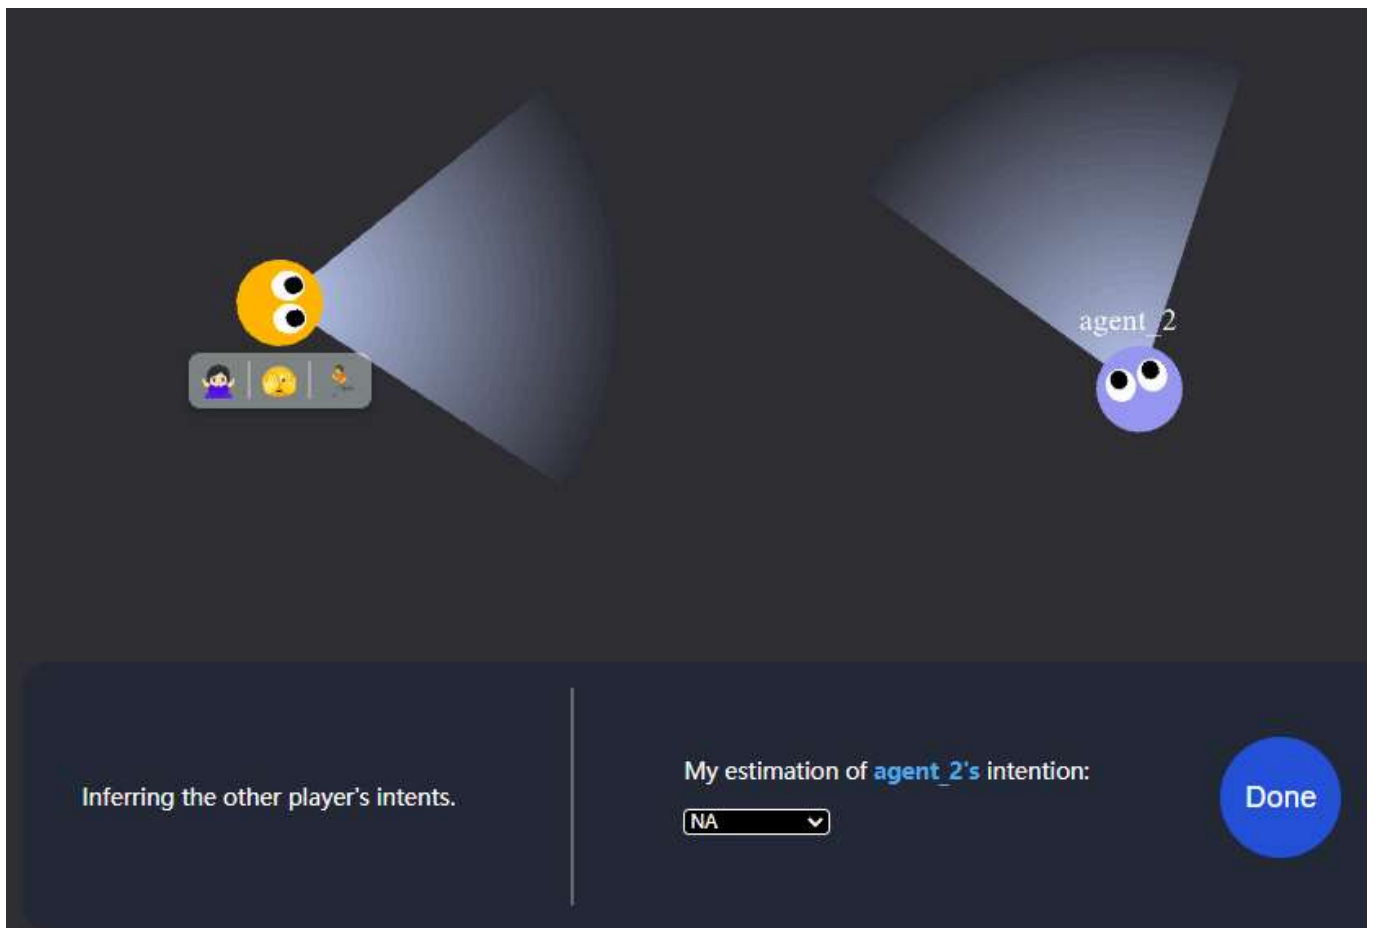

下面是意图的三种参数格式和具体含义。想要更多参考信息，请点击右上角的“? Help”按钮。

下面的意图表示：put cup\_4 into box\_7

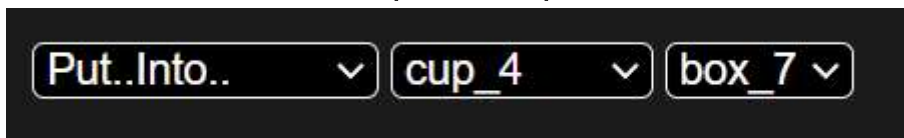

下面的意图表示：help agent 2 to open box\_7

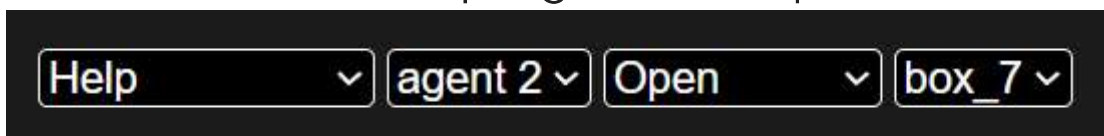

下面的意图表示：request help from agent 1 to open box\_7

RequestHelp ▾

agent 1 ▾

Open ▾

box\_7 ▾

三种参数格式的关系如下图所示：

① Do sth.

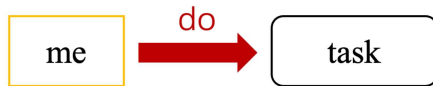

② Help sb. do sth.

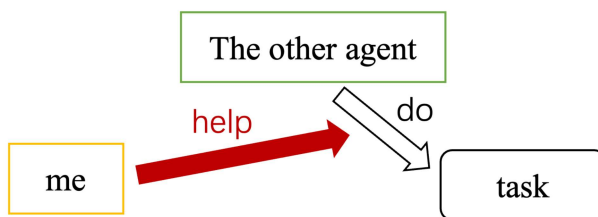

③ Request help from sb. to do sth.

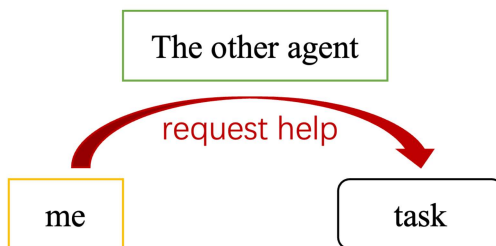

下面，我们介绍游戏中的5个具体的意图例子，剩余未介绍的意图可以点击游戏界面右上角的“? Help”帮助界面获取。

"Greet"

['Greet', 'sb']: Send a social signal to someone. 向某人打招呼。



"Find"

['Find', 'sb/sth']: Locate someone or something. 寻找某人或某物

"RespondTo"

['RespondTo', 'sb']: Respond to someone's signal. 回应某人。

"Inform"

['Inform', 'sb', 'sth']: Let someone know something. 告知某人某事。

"Observe"

['Observe', 'sb/sth']: Collect information about someone or something by observing. 观察某人某物。

注意：在估计另一个智能体的意图时，您只需要写您所能估计出来的另一个智能体的**最高层意图**而不是较低层的子意图（一个高层意图可以被分解为若干个低层的子意图）。

例如：如果你估计 agent 2 的低层意图是 ["Open","box\_2"]，背后的高层意图是 ["Get","books\_3","box\_2"]，即 agent 2 之所以想打开 box\_2 是为了从box\_2拿出books\_3，那你就写 agent\_2 的意图是 ["Get","books\_3","box\_2"]，不要写 ["Open","box\_2"]。

**注意：**如果您完全不知道，就选择“NA”；否则，选择最可能的一个作为猜测。

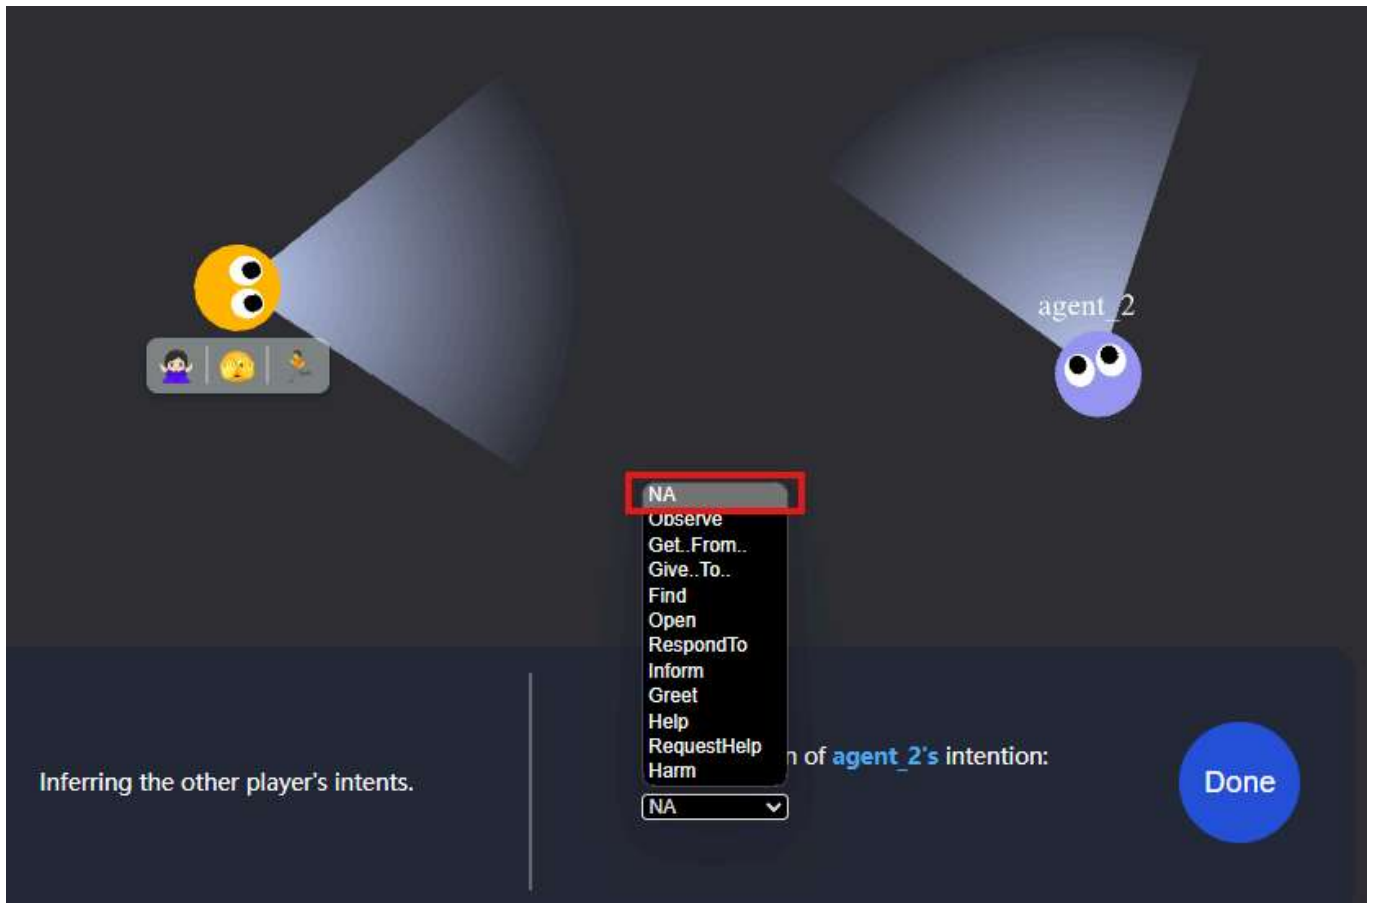

每隔五步，您需要估计一次另一个智能体的价值分布。

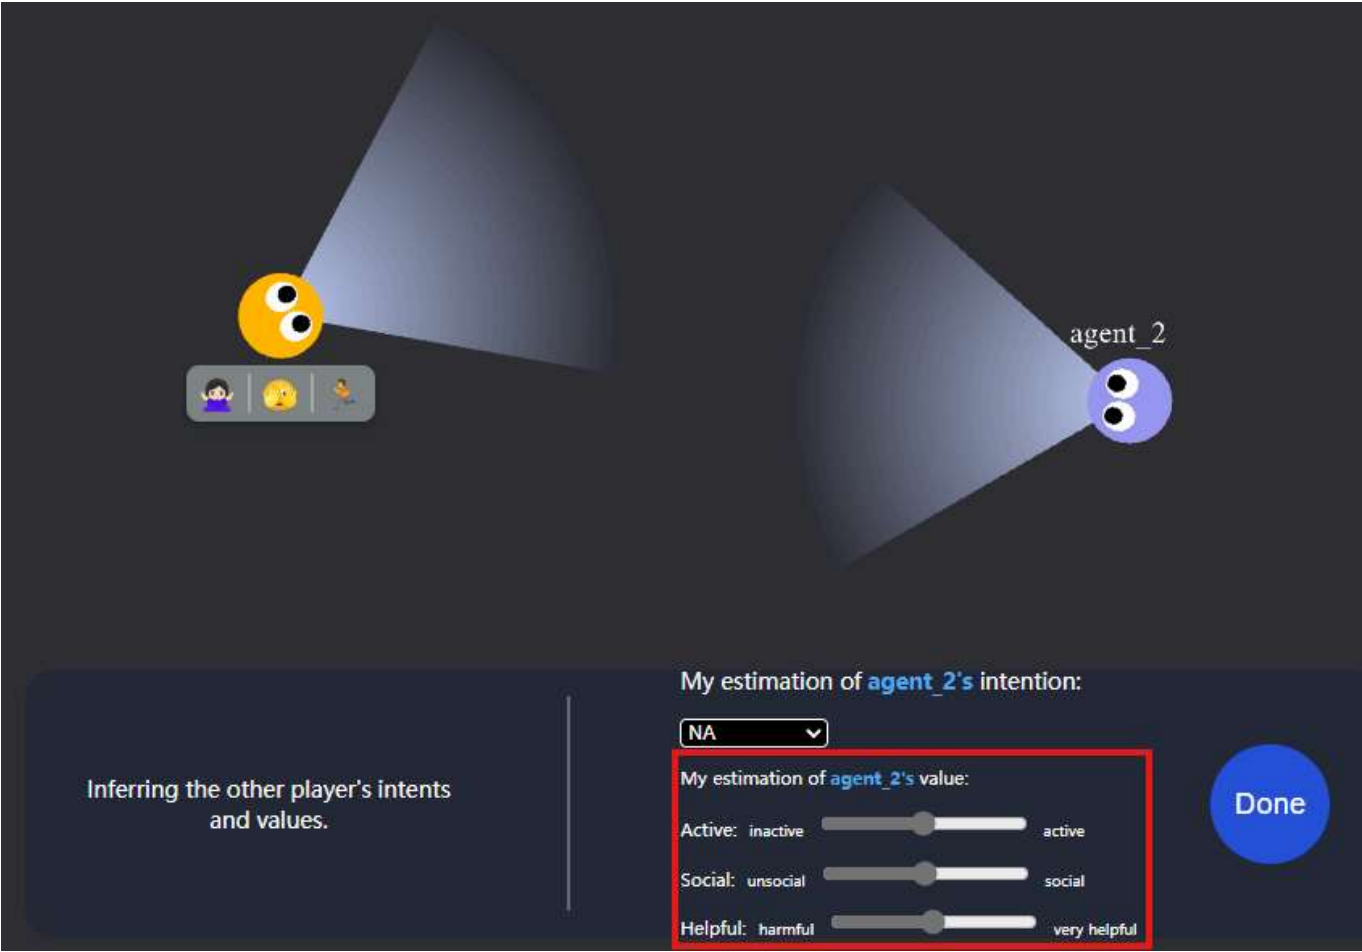

然后，您需要合理选择小黄人的意图。同样地，只需要写最高层次的意图，不需要写子意图。

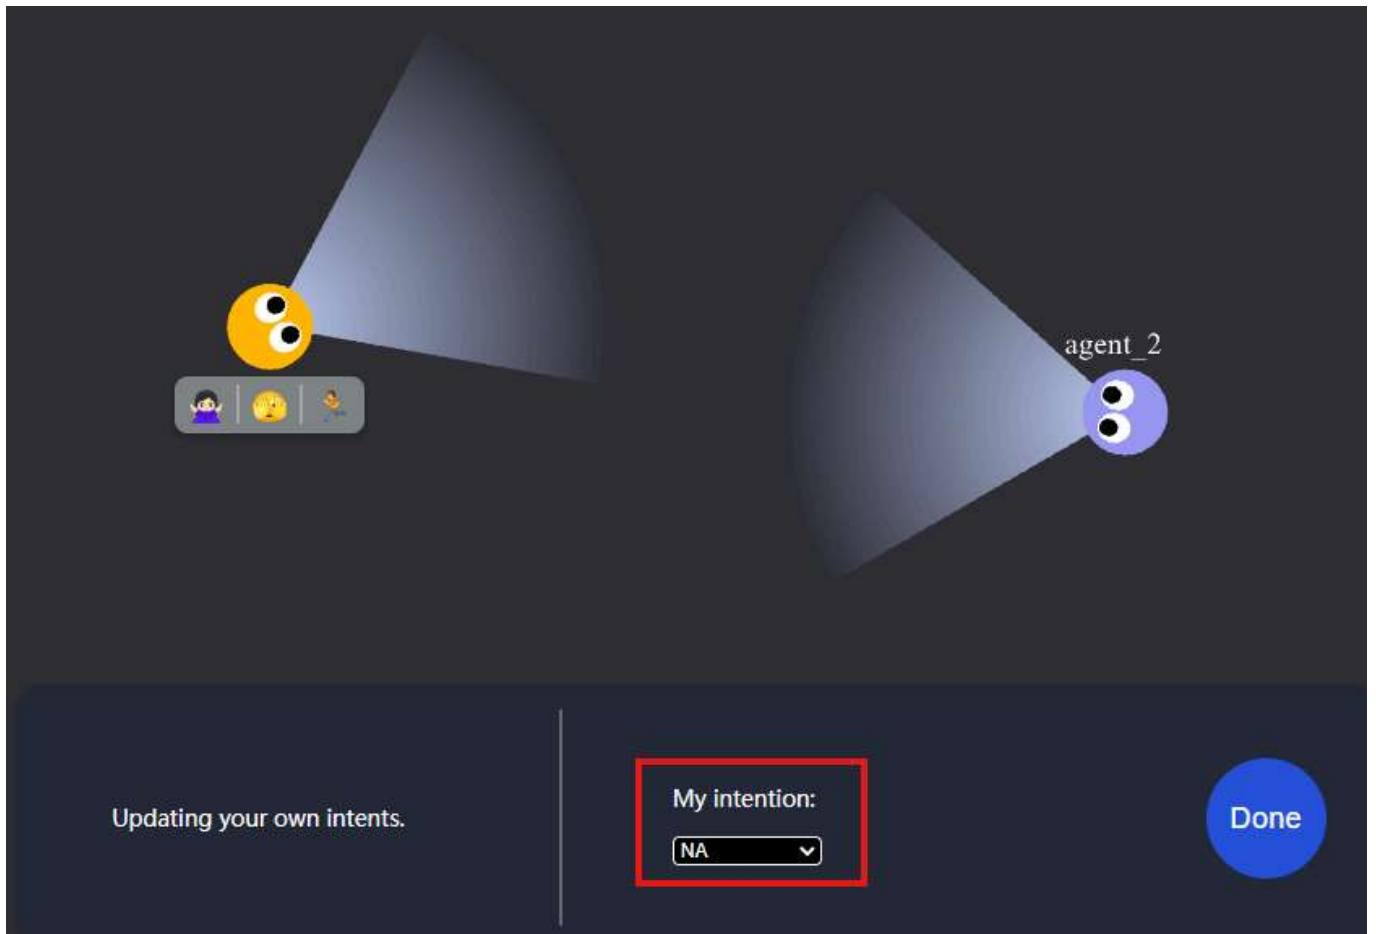

注意： 当你选择小黄人的意图时，你需要考虑**小黄人的当前意图和价值分布**。

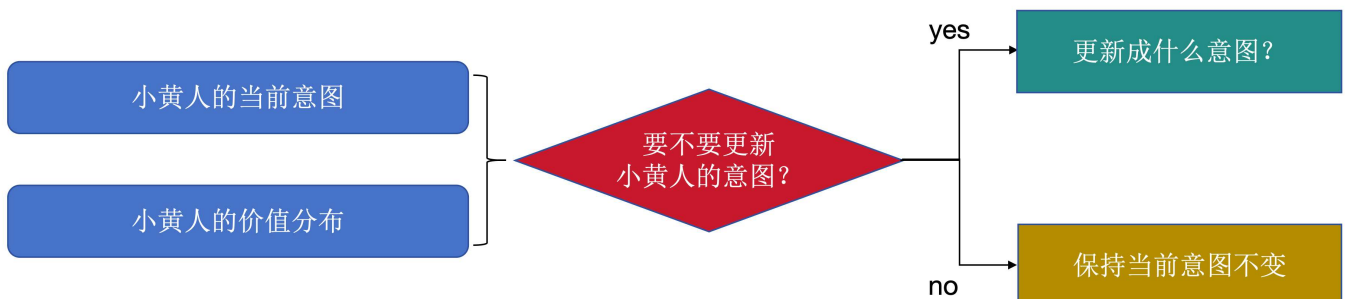

注意： 当你选择小黄人的意图时，你需要考虑**对另一个智能体的当前意图和价值分布的估计**。

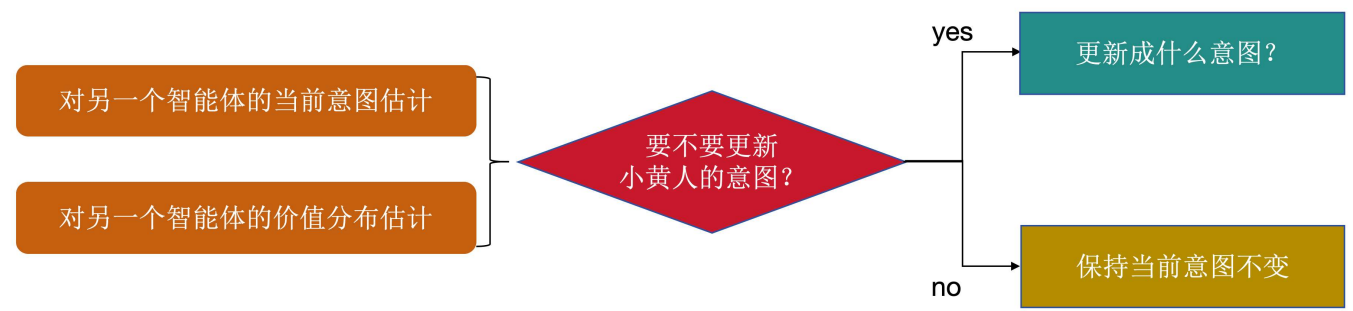

注意： 当你选择小黄人的意图时，你需要考虑**当前的上下文情景**。

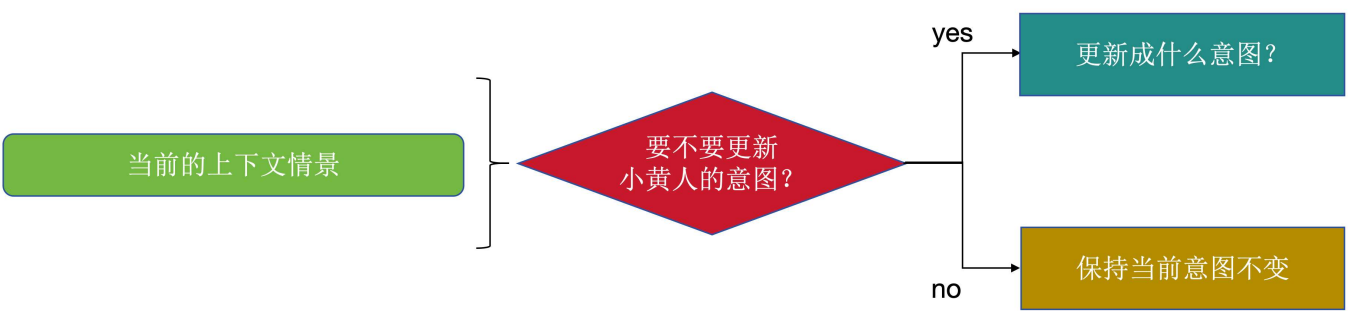

当小黄人的价值分布和小黄人的当前意图产生冲突时，您可以选择对意图作出合理的调整，也可以选择坚持当前意图；**只要您完全投入您的角色并结合具体情境去思考并做出合理的决策即可。**

接下来，您需要**选择小黄人的动作**。

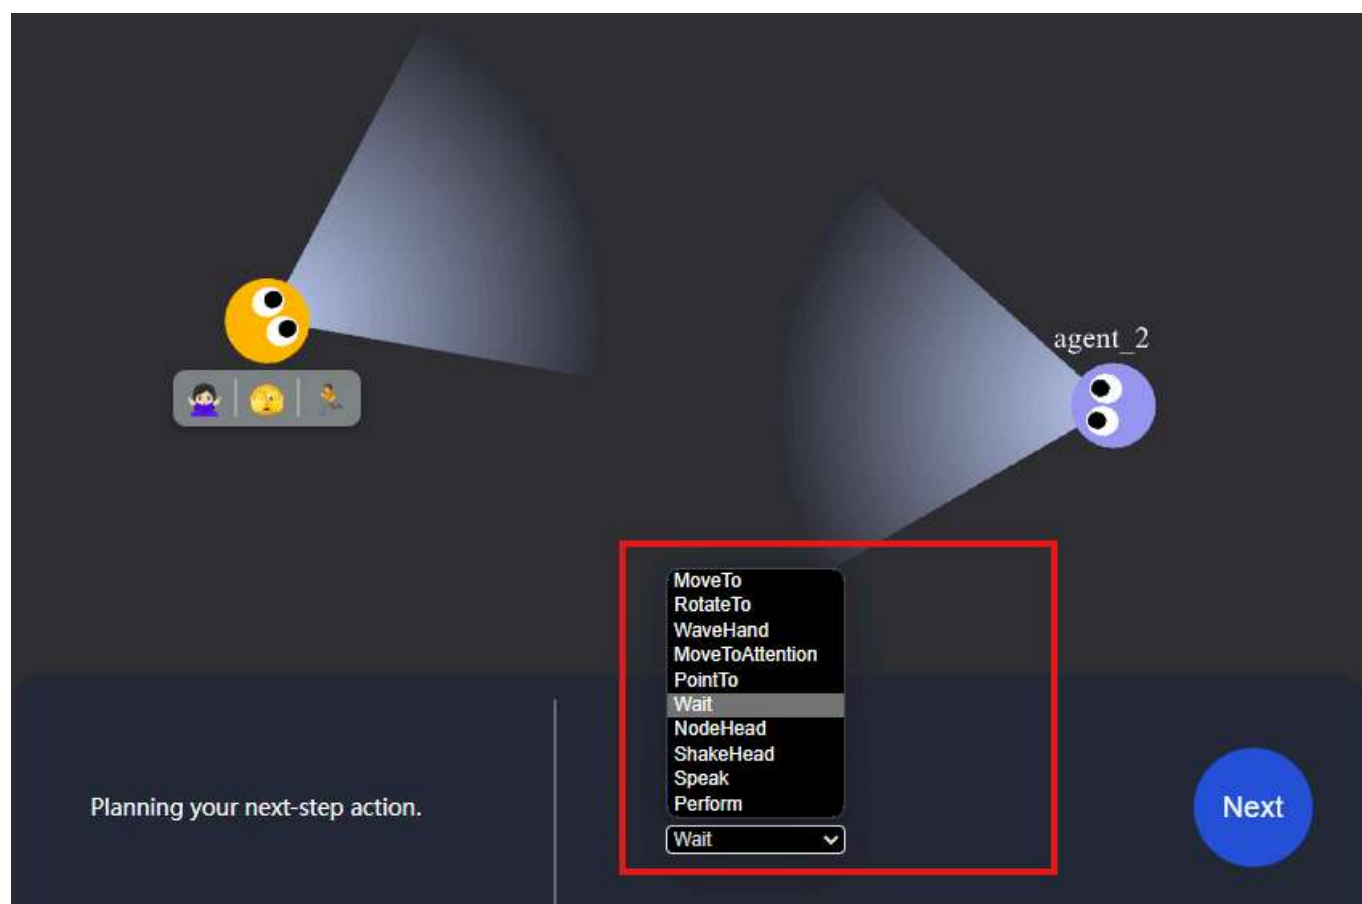

注意：请牢记这是一个角色扮演游戏！**您应当考虑小黄人的价值分布，而不是您本人的价值；**  
**如果您已经改变了小黄人的意图，那您应该根据更新后的当前意图选择小黄人的动作，而不是游戏一开始分配给小黄人的初始意**

图。

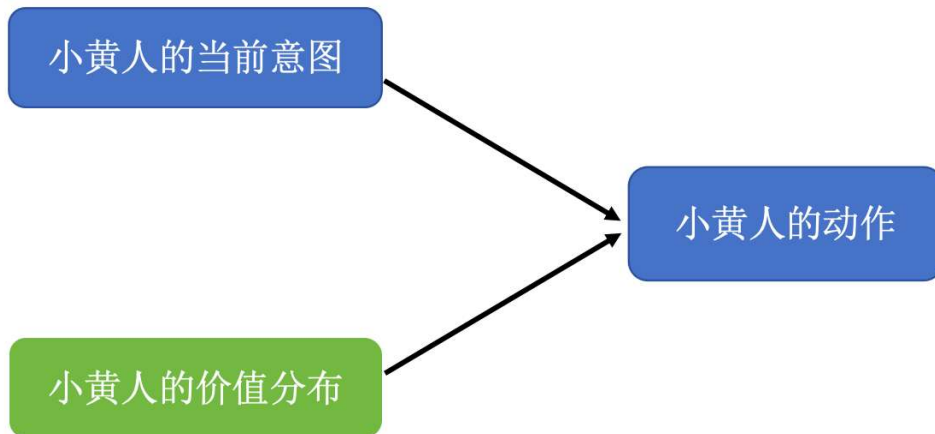

注意：对于“MoveTo”和“RotateTo”这两个动作，您有两种方式选择目的地：

1. 选择某一个物体或者智能体
2. 选择“X: Y:”，然后用鼠标（这时会出现一个红色圆圈）将红色圆圈点在目标位置/方向

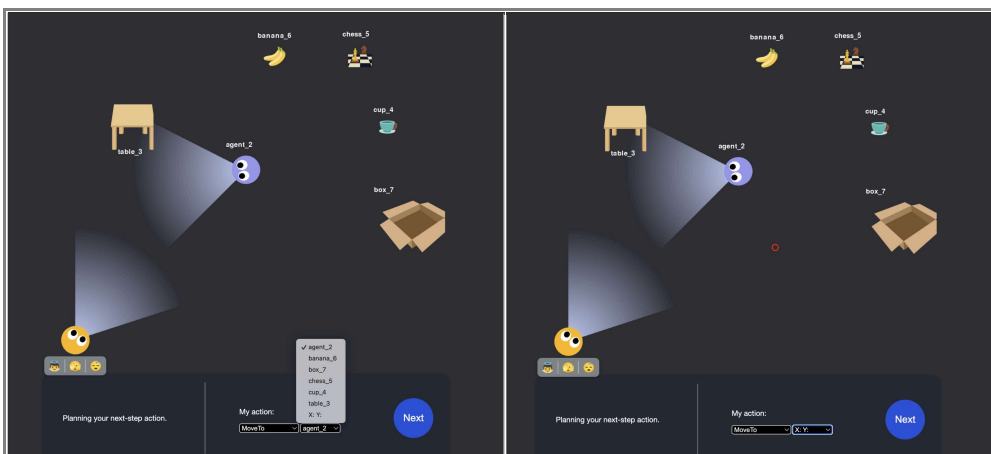



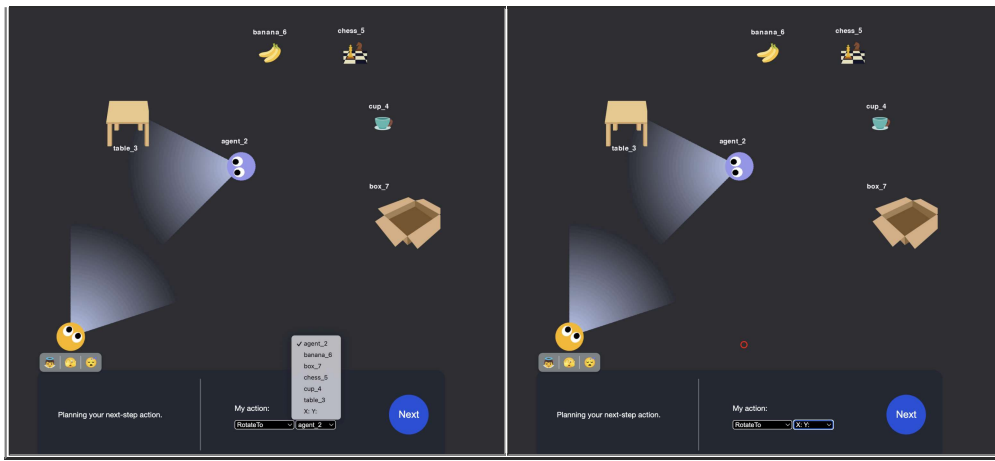

注意：在您选好动作之后，轮到对面的玩家选择；**在等待期间请您保持对屏幕的注意力**，防止漏看对方的动作～

请您尽量对您游戏过程中每一步的推理过程或者决策理由进行阐述，写在下图对应的方框内，中英文均可。如果您实在没有什么可说的，或者没有进行推理，请写“无”；如果和上一步相同，请写“同上”。

我们会根据您的答题质量，给出相应的奖金～（5-30元）

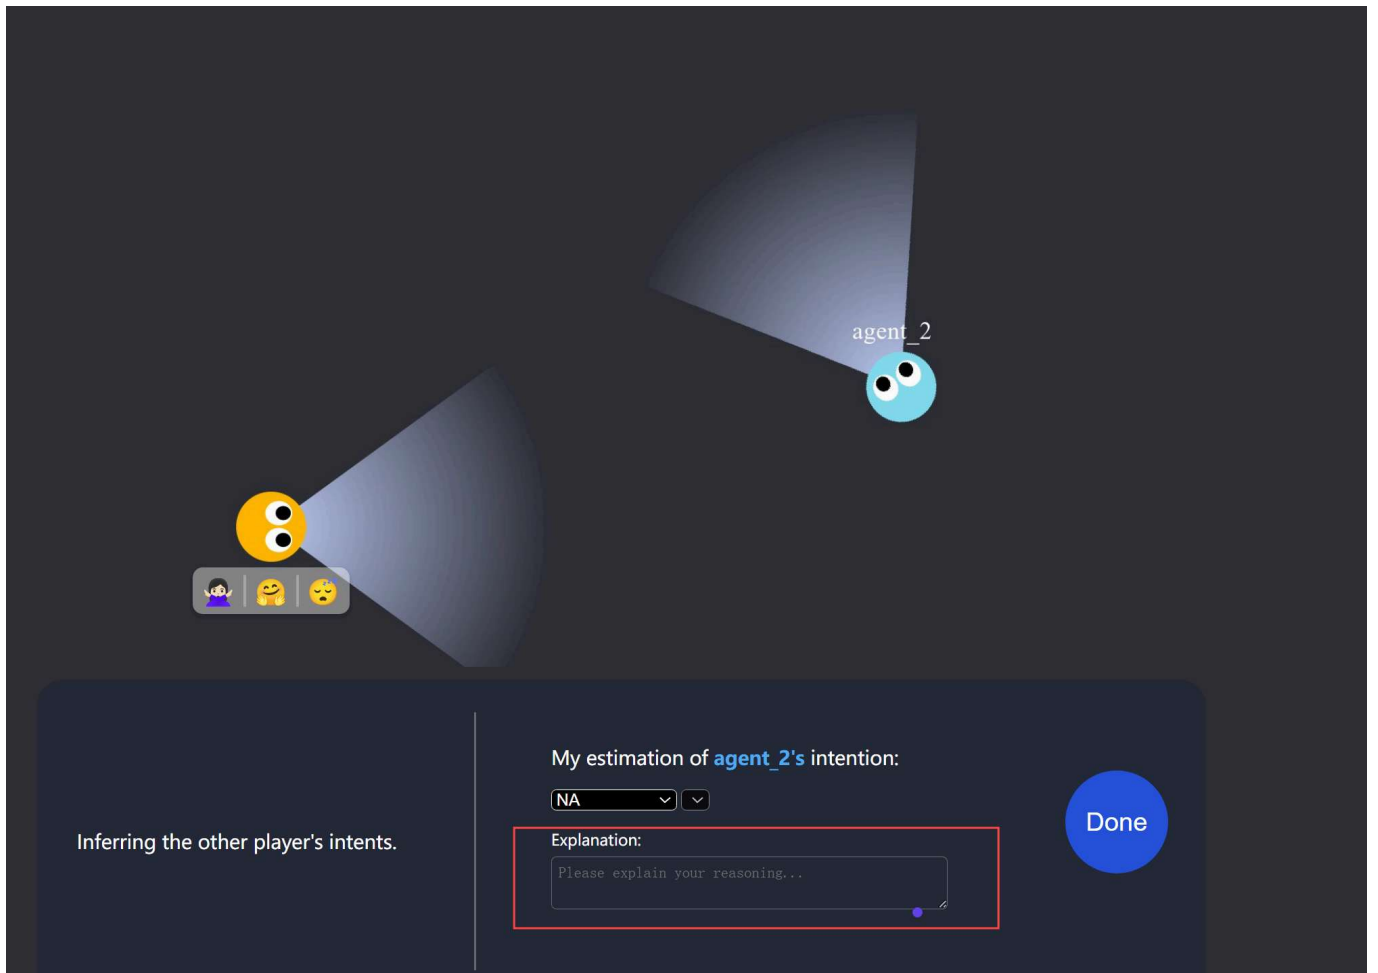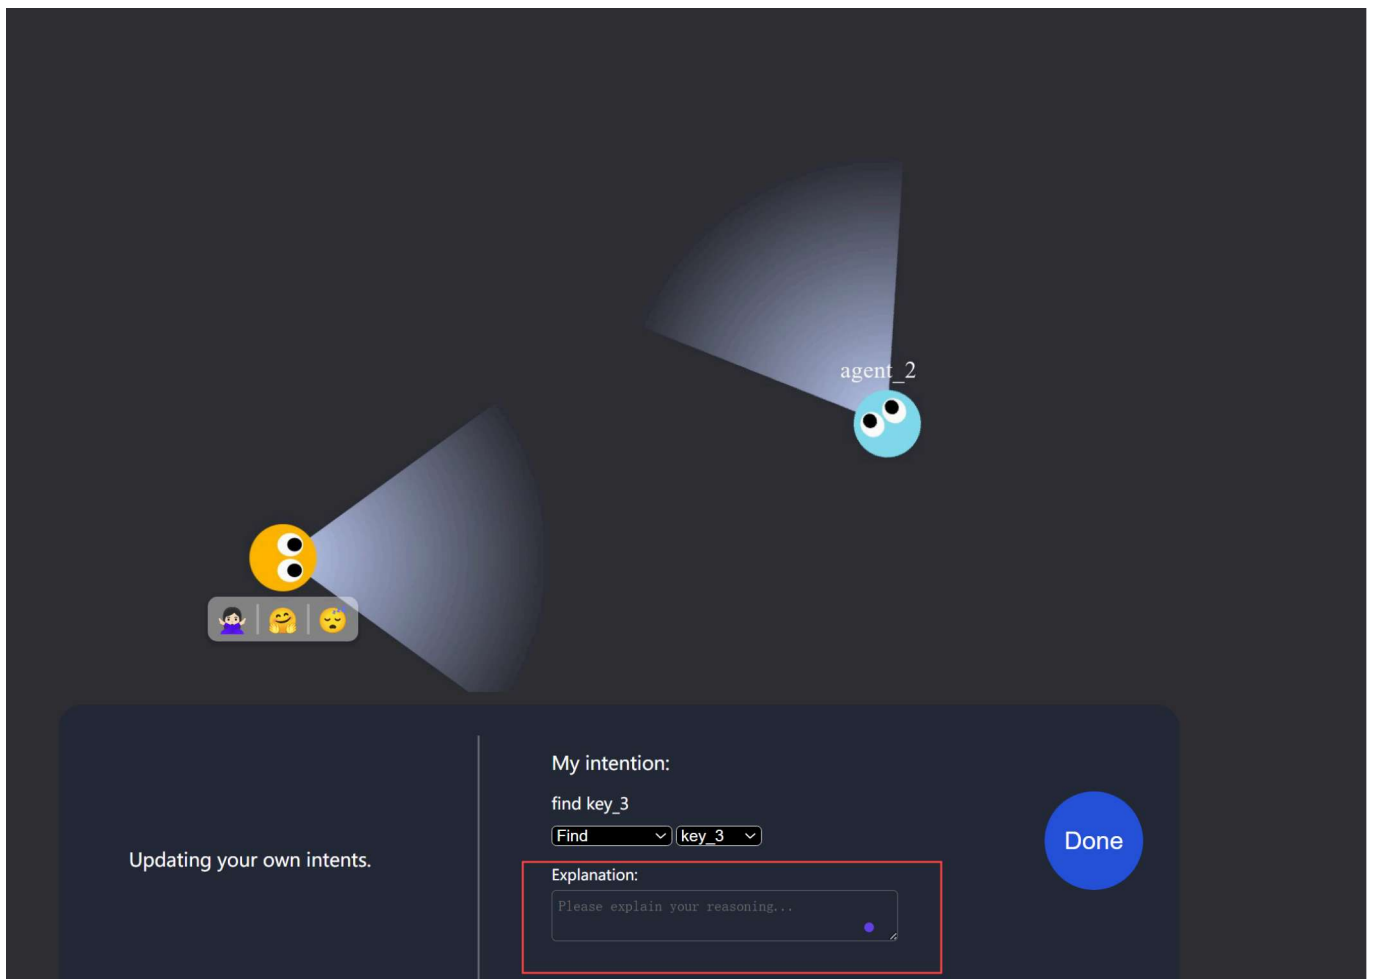

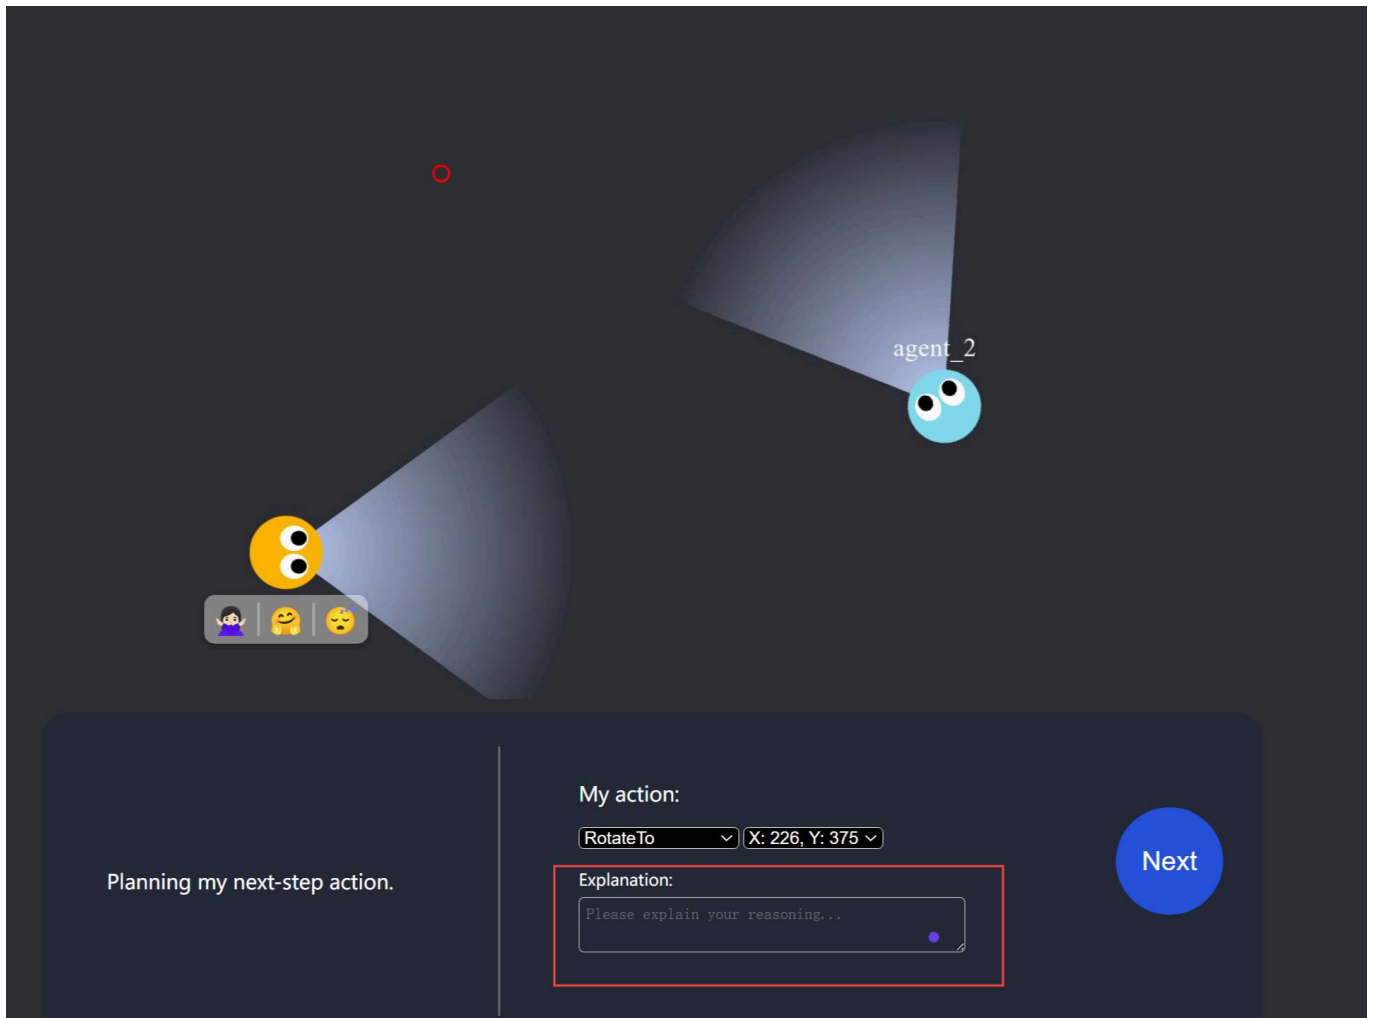

如果你发现游戏突然结束了，可能是因为：你或另一个智能体达成了意图，或是游戏达到了最大轮数，有时也需要你们都达成自己的意图游戏才能结束。

**注意： 游戏结束的条件并不等于获得游戏最终奖励的条件！**

**要获得游戏的最终奖励，你应该：**

1. 充分投入地扮演好自己的角色，**带着角色的初始意图设定（如果有）和角色的价值设定去行动，设身处地地给出合理的选择。**
2. 当自己的角色价值和完成给定的初始意图之间有矛盾的时候，要代入角色和情境去思考，做出合理的决策即可。

## **【总结】** 你需要做的：

- 估计对方的意图
- 估计对方的价值
- 你有初始的分配意图，你可以选择更新这个意图。
- 你有分配的价值，价值是不会变的。
- 选择自己的动作
- 当你的意图和价值冲突的时候，请代入角色和情境去思考和权衡，做出合理的决策即可

## **entrance of quiz**

您已经完成了教程~ 🎉

下面您将进入测试，请您认真答题~

注意：只有全部答对才能进入下一环节～否则您将需要重新阅读教程并重新进行测试～您一共有2次机会～

## q1-1

哪个智能体是你需要扮演的？

- ☐ 写有“me”标签的智能体
- ☐ 黄色的智能体
- ☐ 在中间的智能体

正确！

**黄色**的智能体是你需要扮演和控制的。

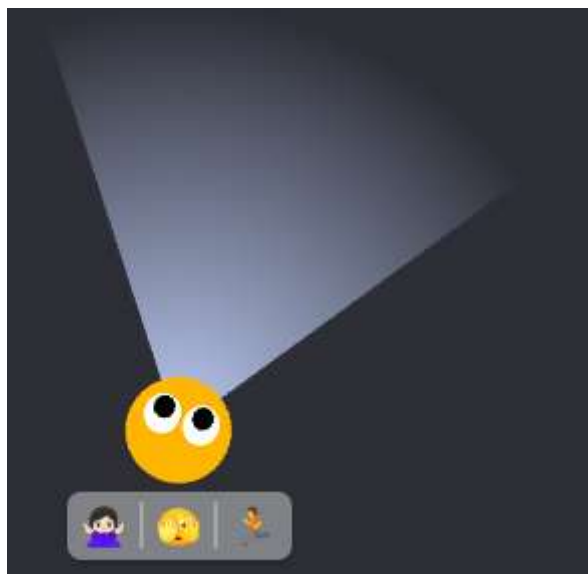

错误！

智能体会移动位置，不一定在中间。

**黄色**的智能体是你需要扮演和控制的。

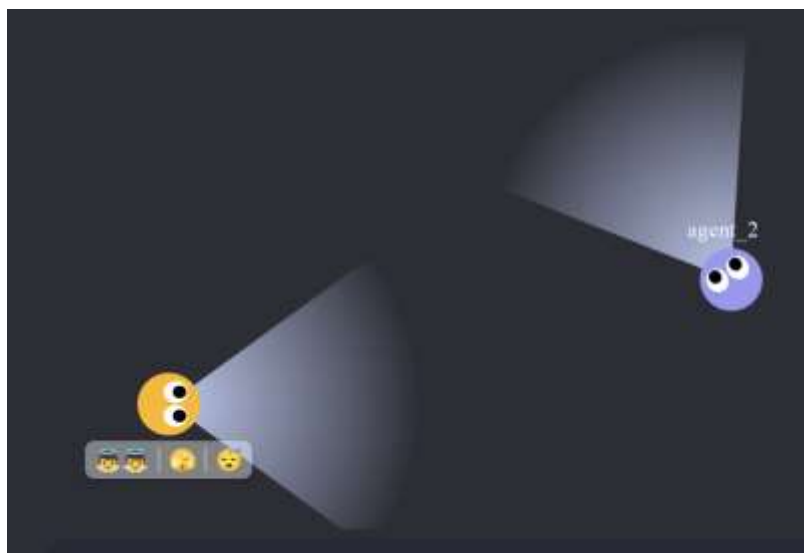

错误！

你扮演的智能体没有写标签，需要靠颜色来区分。

黄色的智能体是你需要扮演和控制的。

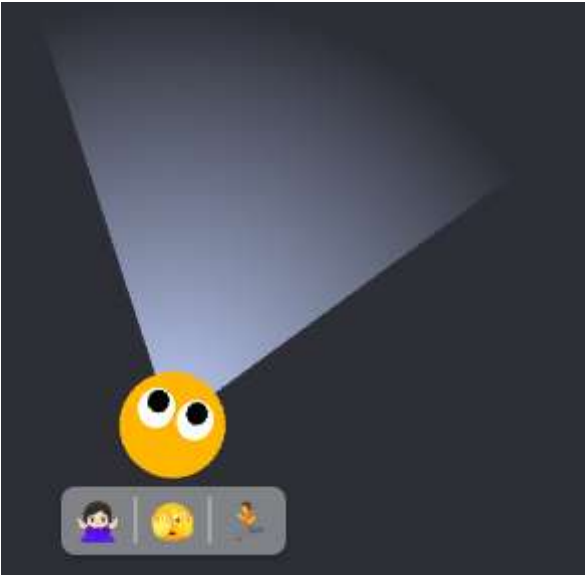

q1-2

在下面的场景中，“小黄人”能看到什么？

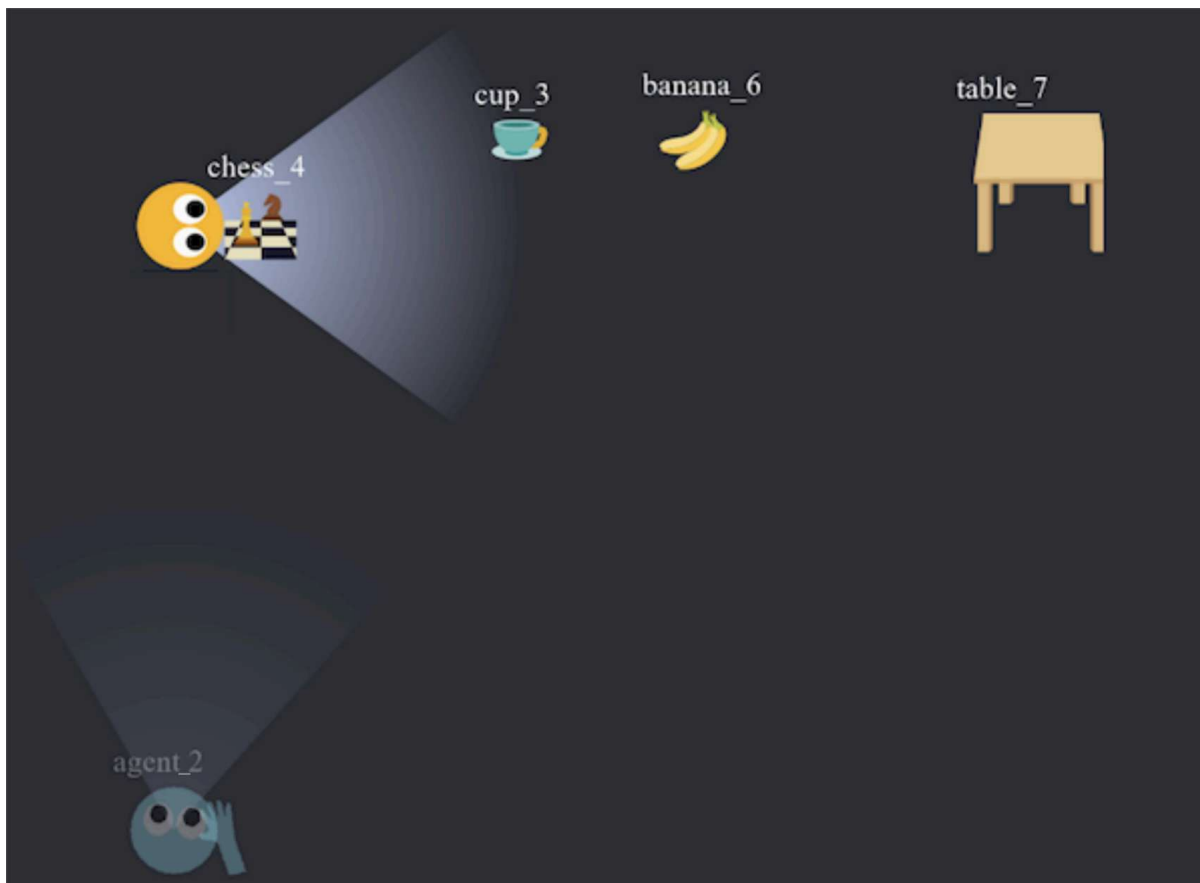

- ☐ chess\_4, cup\_3, banana\_6 and table\_7
- ☐ chess\_4 and cup\_3
- ☐ chess\_4
- ☐ chess\_4, cup\_3, banana\_6, table\_7 and agent\_2

正确!

图中的扇形表示智能体的注意力方向和视野范围。

虽然图中只绘制了一个扇形，但实际情况下，**智能体的注意力覆盖了两条射线之间的整个区域，并且可以看到视线范围内尽可能**



远的目标。

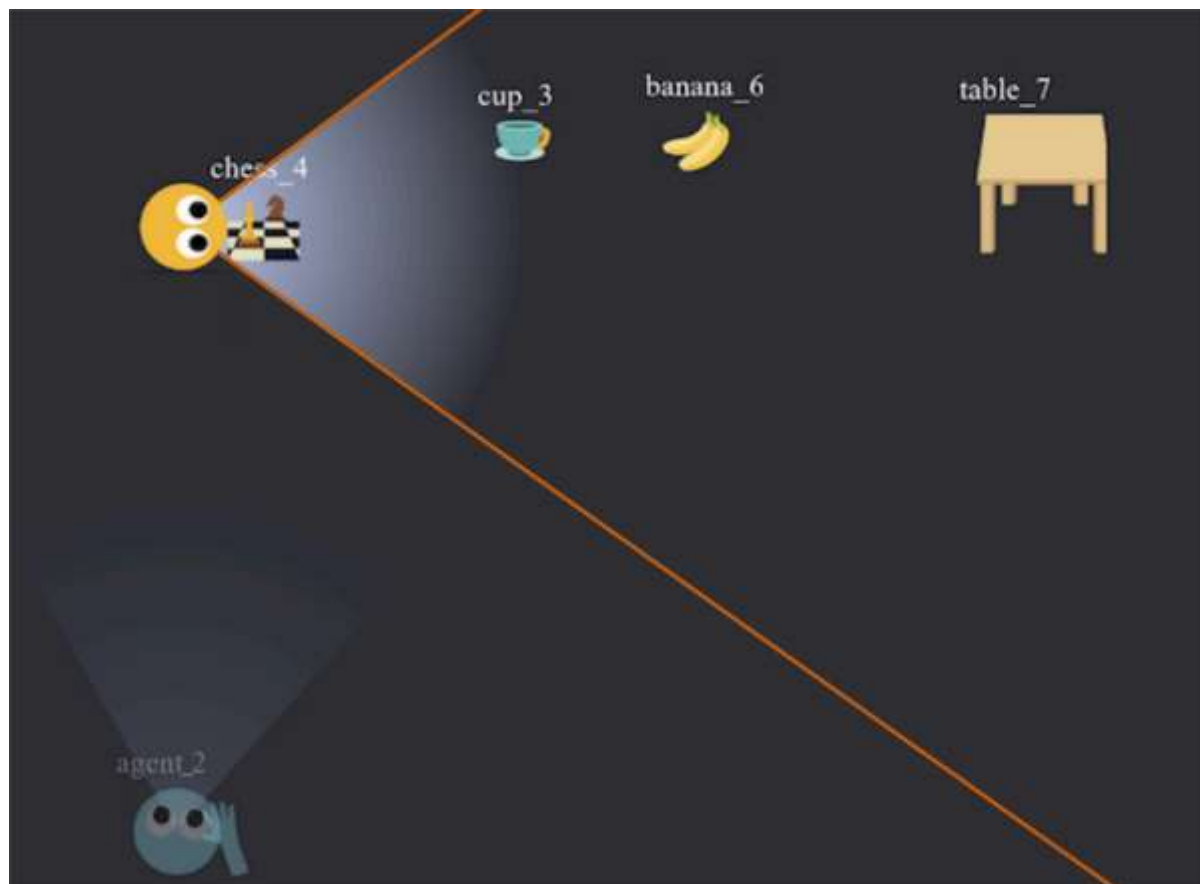

错误！

小黄人不仅可以看到chess\_4， 还可以看到cup\_3, banana\_6和table\_7

图中的扇形表示智能体的注意力方向和视野范围。

虽然图中只绘制了一个扇形，但实际情况下，**智能体的注意力覆盖了两条射线之间的整个区域，并且可以看到视线范围内尽可能**

远的目标。

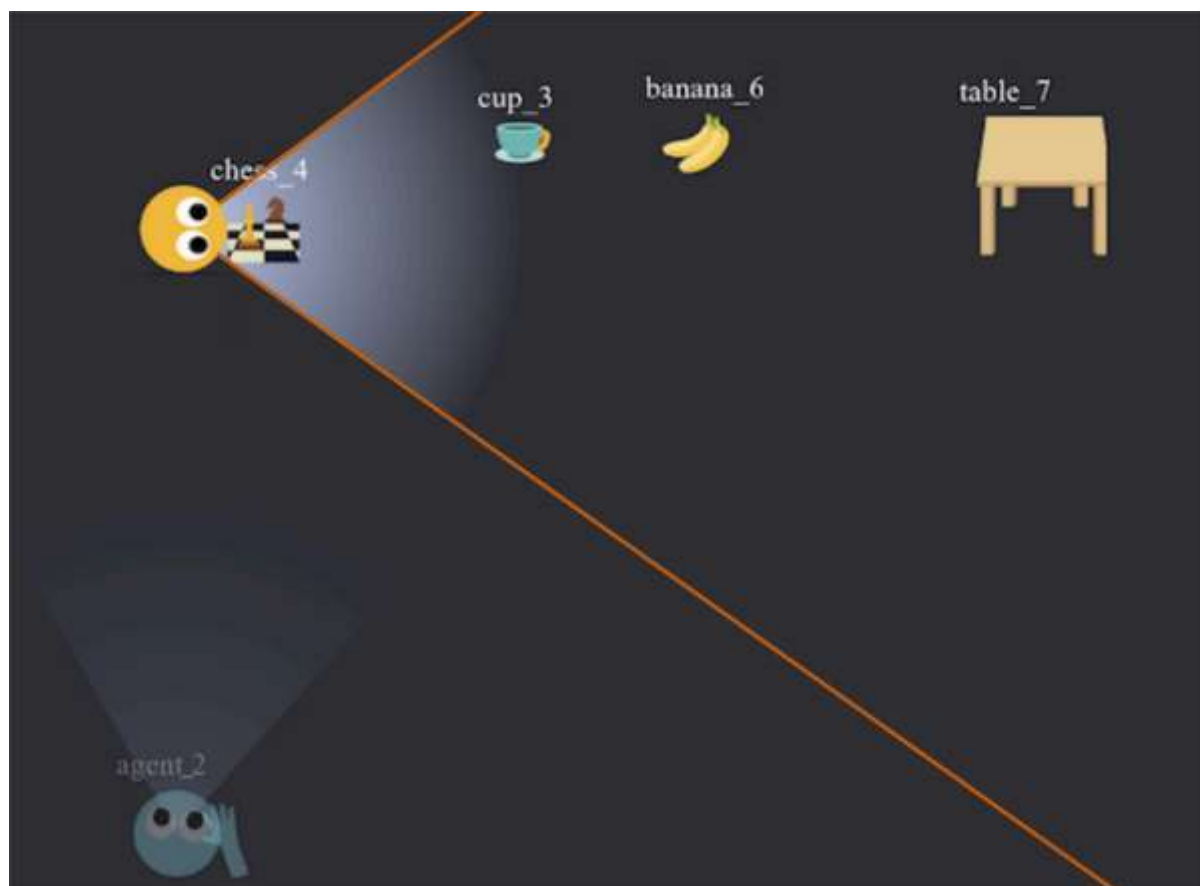

错误！

小黄人不仅可以看到chess\_4和cup\_3， 还可以看到  
banana\_6和table\_7

图中的扇形表示智能体的注意力方向和视野范围。

虽然图中只绘制了一个扇形，但实际情况下，**智能体的注意力覆盖了两条射线之间的整个区域，并且可以看到视线范围内尽可能**

远的目标。



错误！

你所扮演的智能体看不到agent\_2, agent\_2不在扇形的两条射线范围内

图中的扇形表示智能体的注意力方向和视野范围。虽然图中只绘制了一个扇形，但实际情况下，**智能体的注意力覆盖了两条射线之间的整个区域，并且可以看到视线范围内尽可能远的目标。**

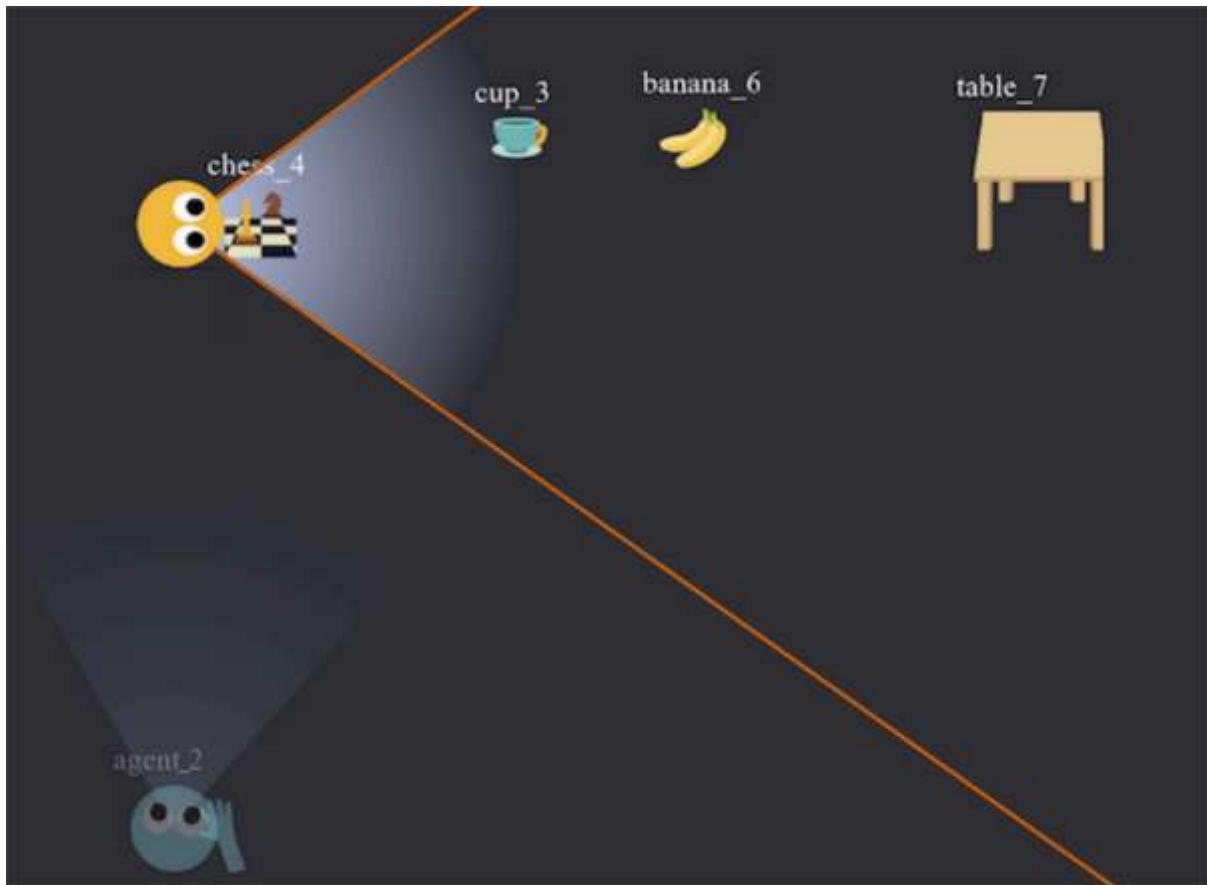

**q1-3**

下面哪个图对应动作 ["Grab", "key\_3"]?

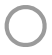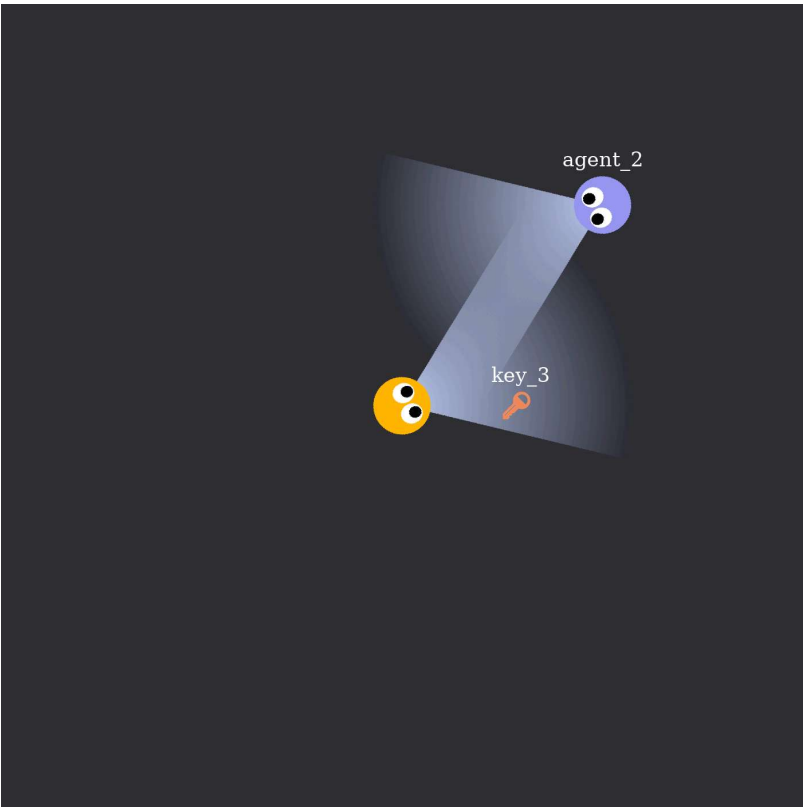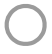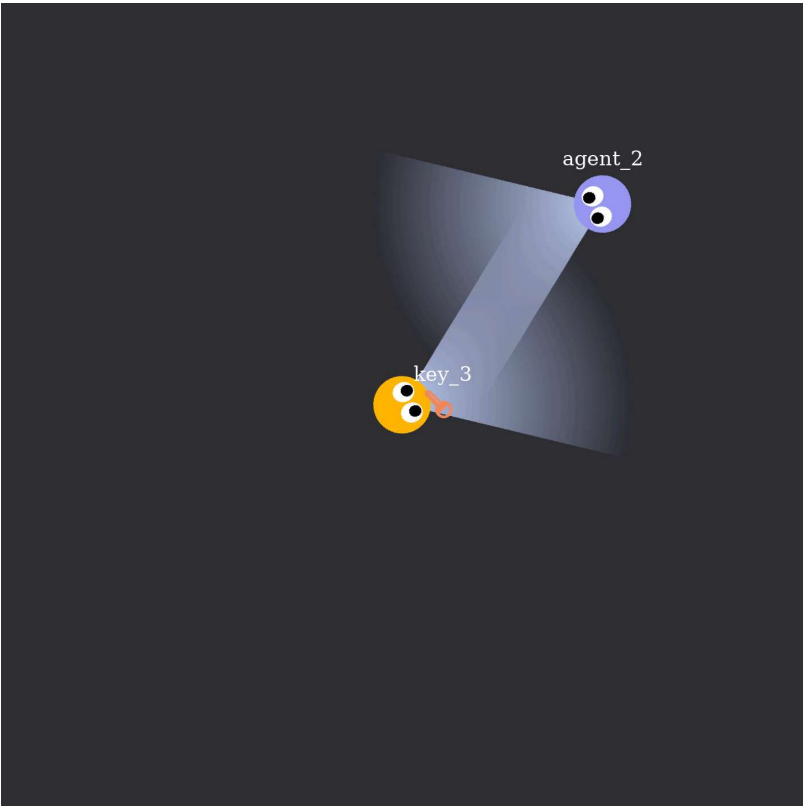

正确!

下面的图对应动作["Grab", "key\_3"]

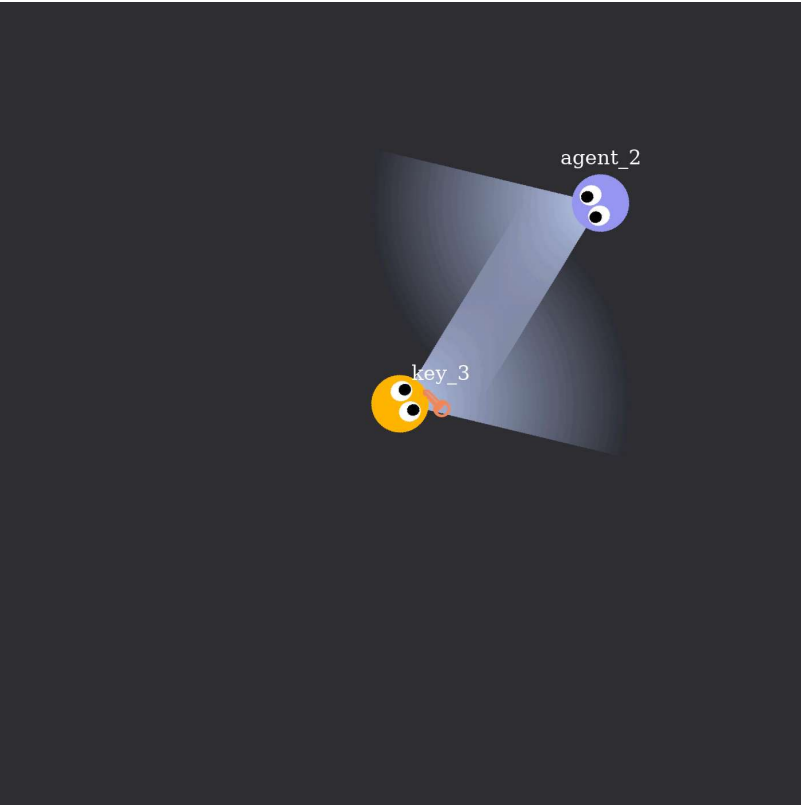

错误！  
下面的图才是动作["Grab", "key\_3"]

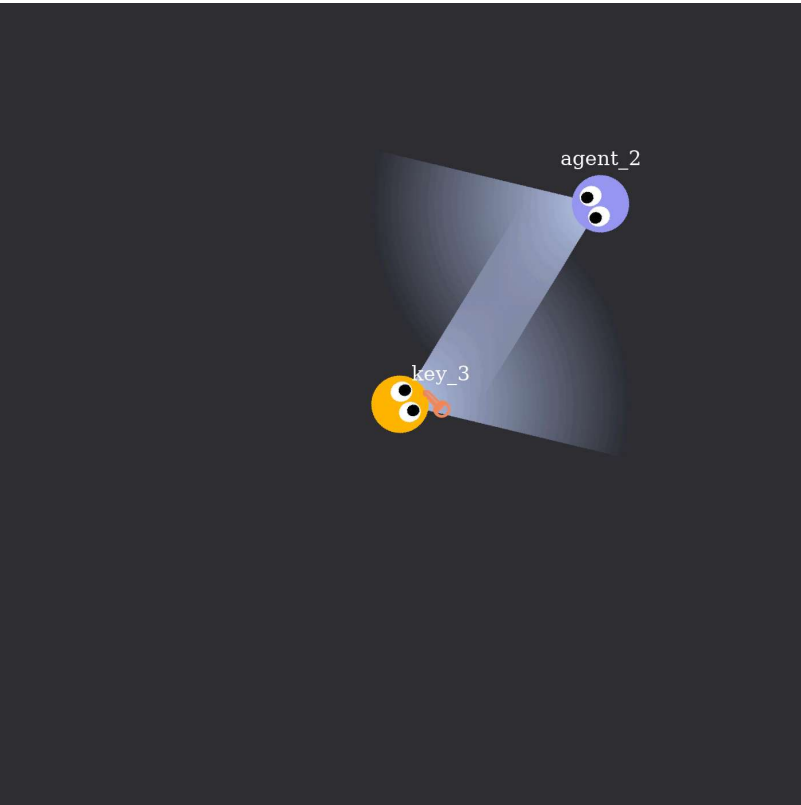

你选择的这个图对应的动作是["MoveTo", "key\_3"]

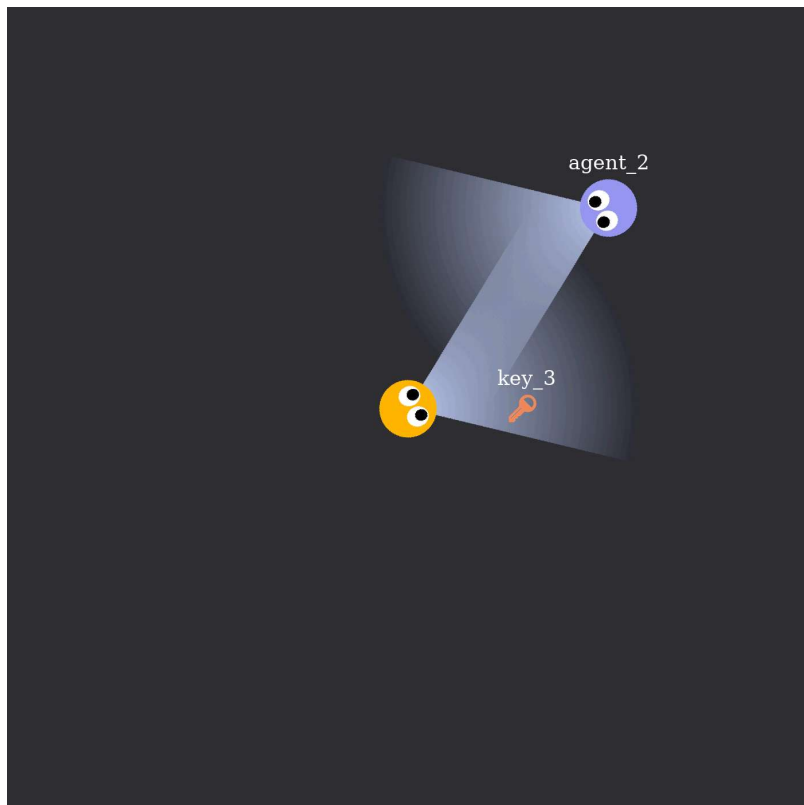

## q1-4多选

**(多选)** 如果你扮演的小黄人不在其他智能体的注意力范围内，如何吸引他/她的注意力？

- ☐ NodHead
- ☐ WaveHand
- ☐ Speak
- ☐ MoveToAttention

正确！

如果你扮演的智能体不在其他智能体的注意力范围内，你可以用MoveToAttention的动作或者Speak的动作吸引他/她的注意力，前者他/她可以看到你，后者他/她可以听到你。

动作WaveHand和NodHead不行，因为你扮演的智能体不在其他智能体的注意力范围内，做这两个动作其他智能体看不到，无法吸引他/她的注意力。

错误！

这是一个多选题。

如果你扮演的智能体不在其他智能体的注意力范围内，除了用MoveToAttention的动作之外，你还可以用Speak的动作吸引他/她的注意力，他/她可以听到你。

错误！

这是一个多选题。

如果你扮演的智能体不在其他智能体的注意力范围内，除了用



Speak的动作之外，你还可以用MoveToAttention的动作吸引他/她的注意力，他/她可以看到你。

**错误！**

动作WaveHand和NodHead不行，因为你扮演的智能体不在其他智能体的注意力范围内，做这两个动作其他智能体看不到，无法吸引他/她的注意力。

**q1-5**

下图中的动作是什么？

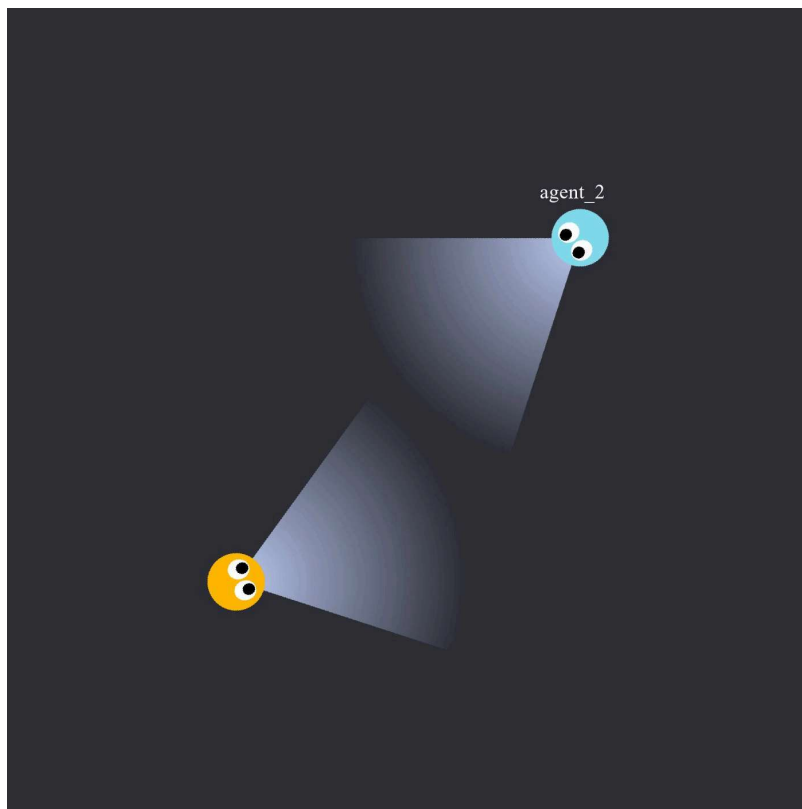

- ☐ ["RotateTo", "agent\_2"]
- ☐ ["NodHead", "agent\_2"]

正确！

下图中的动作是["NodHead", "agent\_2"]

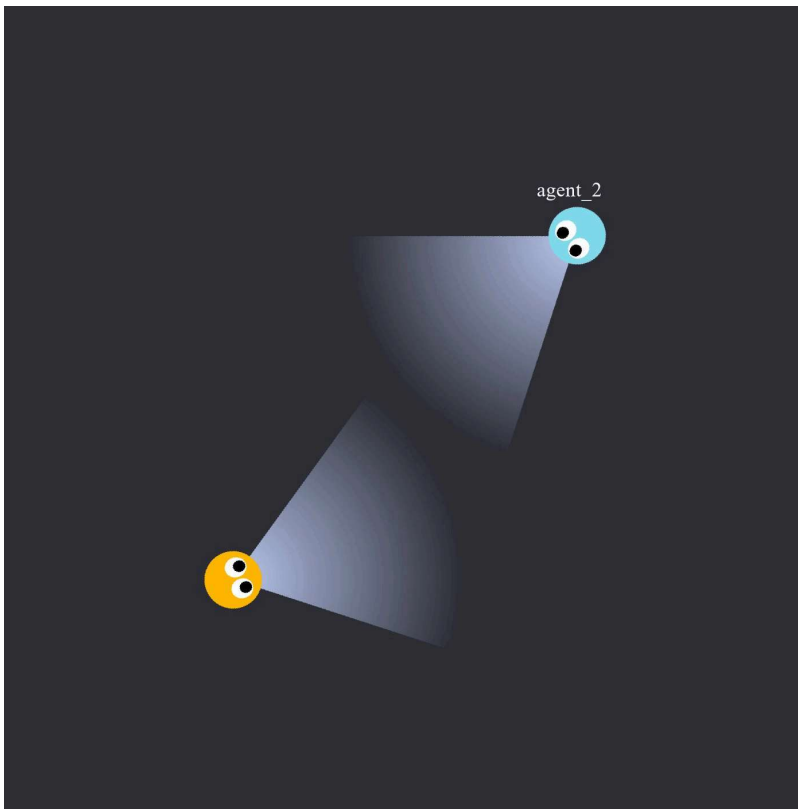

错误!

下图中的动作是["NodHead", "agent\_2"]

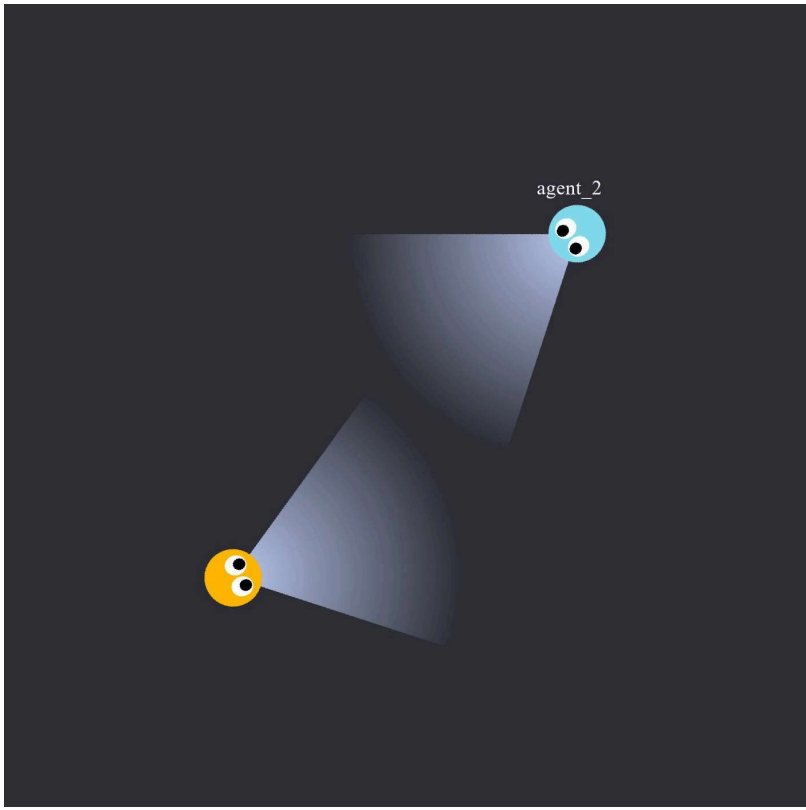

动作["RotateTo", "agent\_2"]对应的图是：

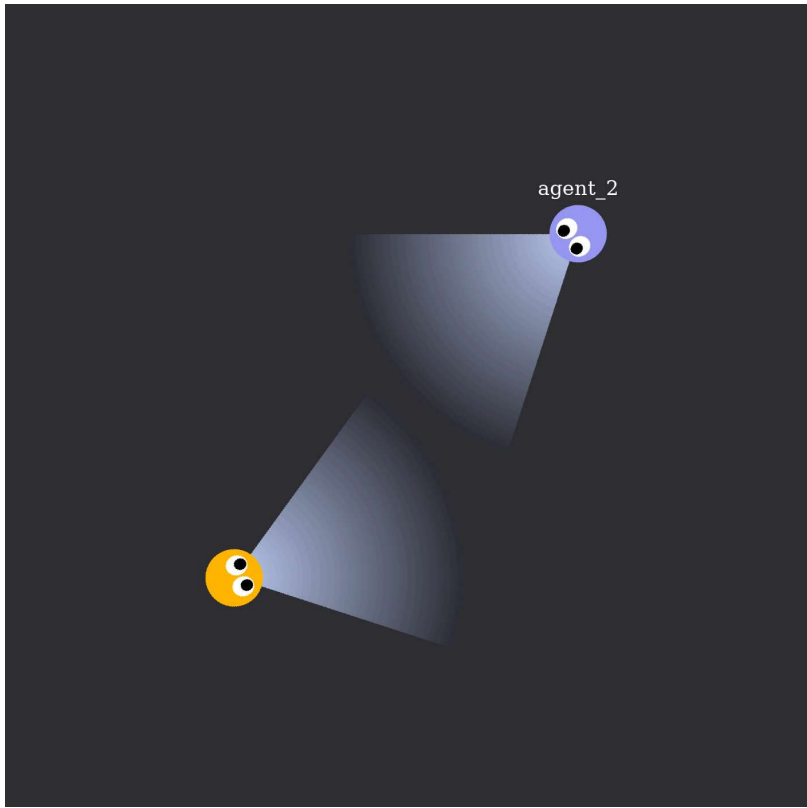

## q1-6

下图中的动作是什么？

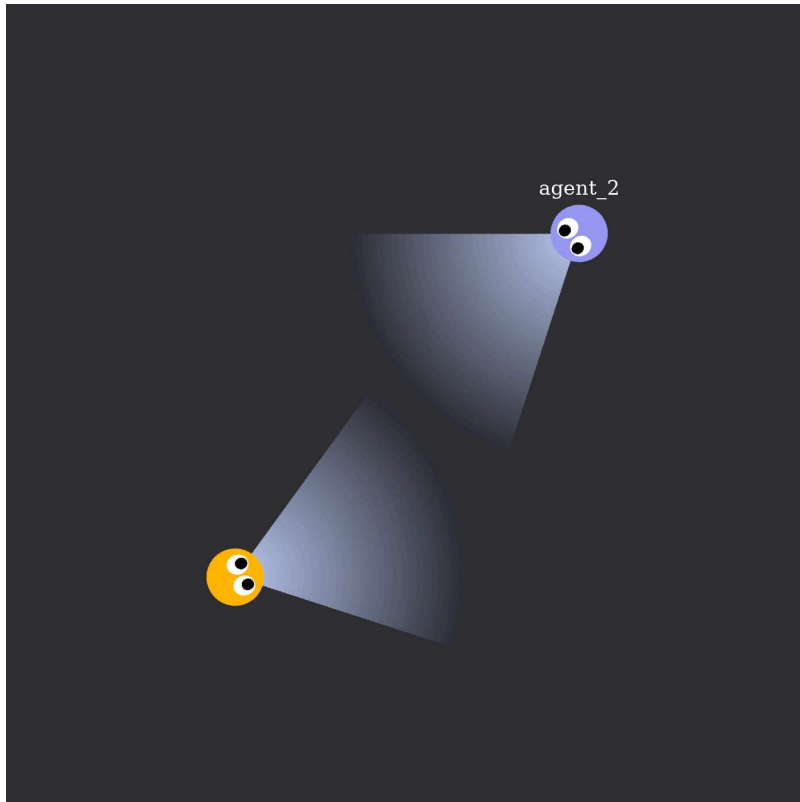

- ☐ ["WaveHand", "agent\_2"]
- ☐ ["Speak", "Hello"]

正确！

图中的动作正是 ["WaveHand", "agent\_2"]

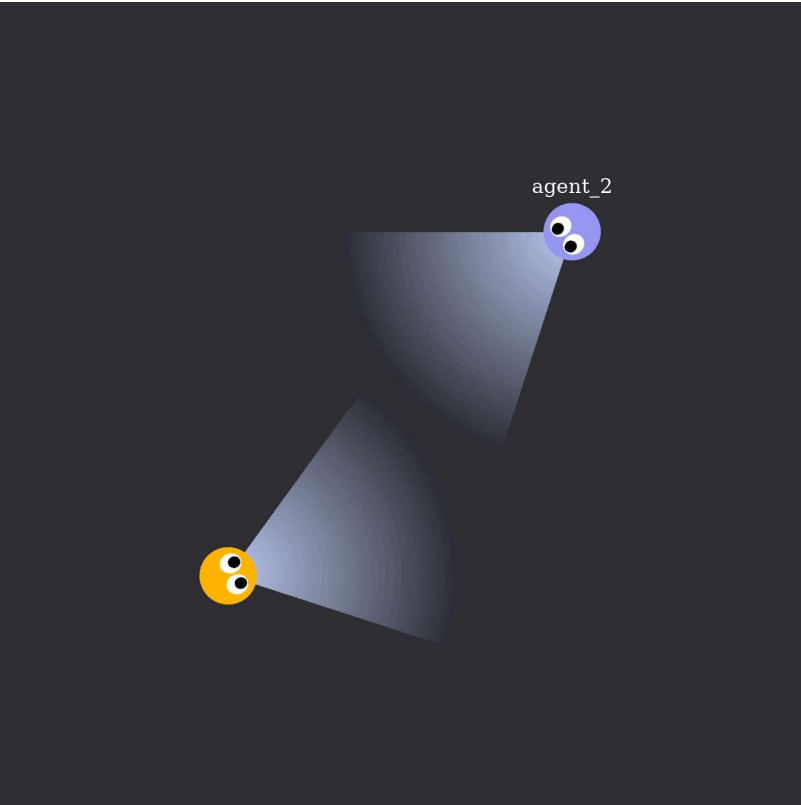

错误!

图中的动作是 ["WaveHand", "agent\_2"]

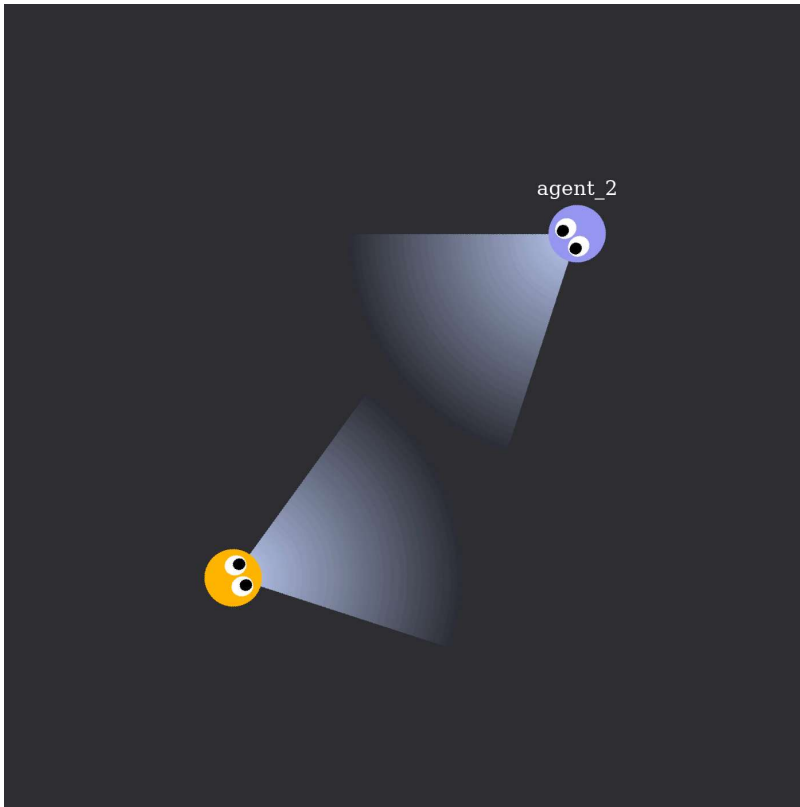

**["Speak", "Hello"]**时你扮演的智能体手部不会有动作，且屏幕上会出现hello

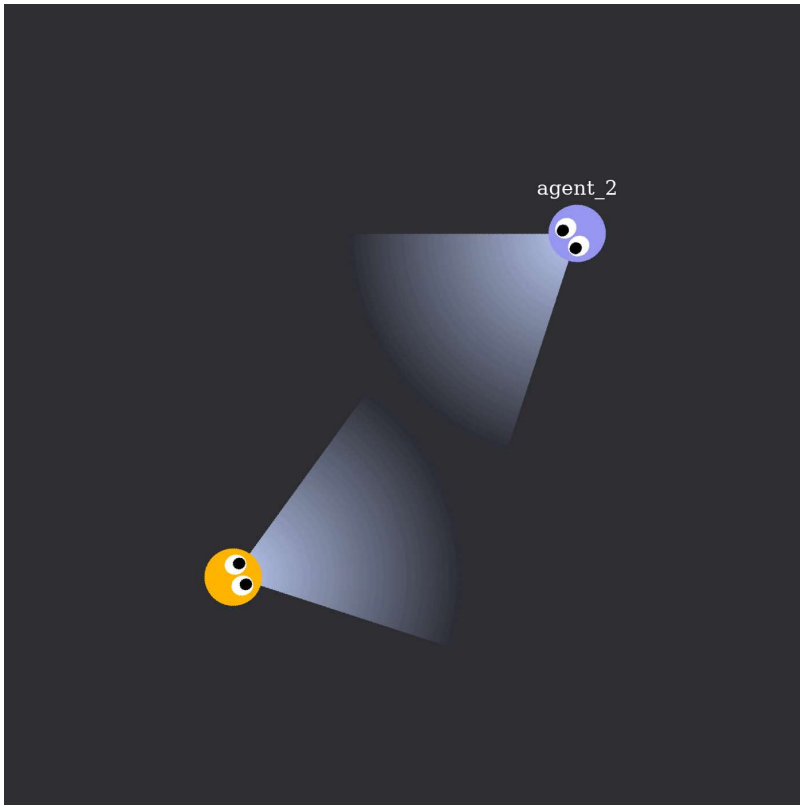

## q1-7

下图中的动作是什么？

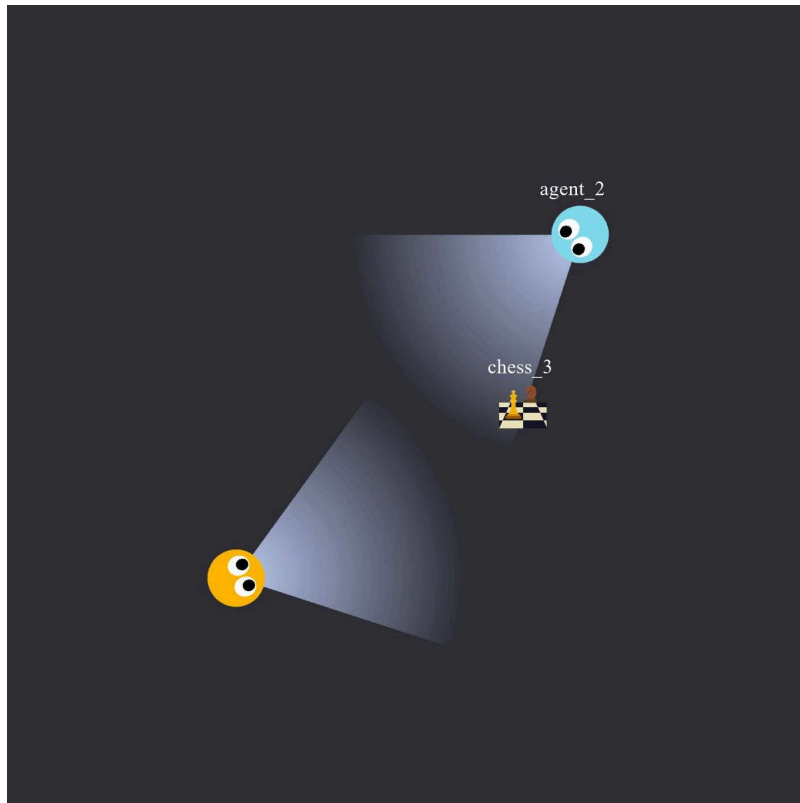

- ☐ ["FollowPointing", "agent\_2" ]
- ☐ ["PointTo", "chess\_3"]
- ☐ ["PointTo", "agent\_2"]

正确！

图中的动作正是 **["PointTo", "chess\_3"]**



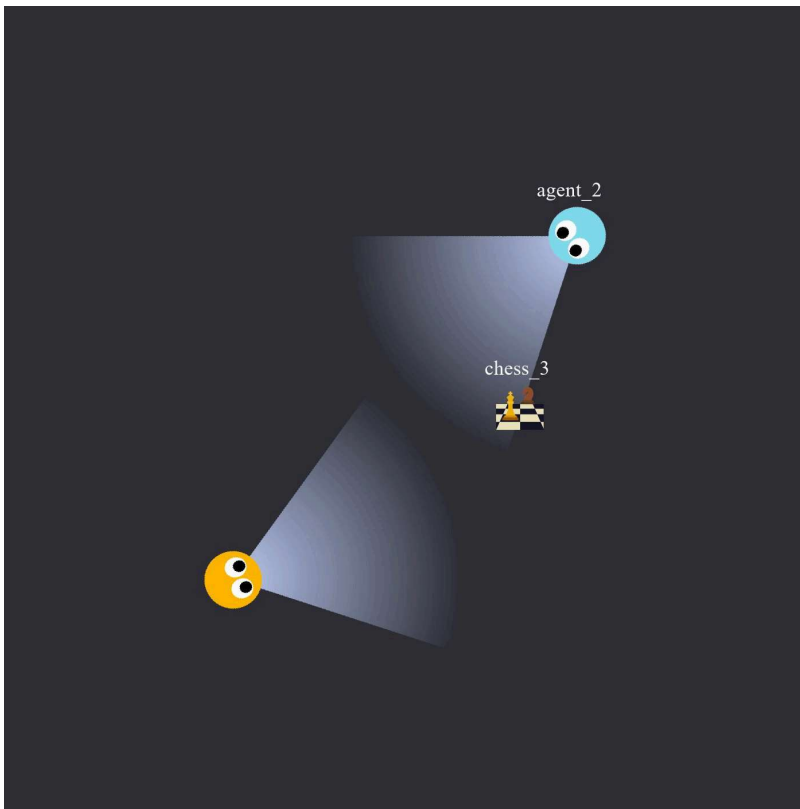

错误!

图中的动作应是 ["PointTo", "chess\_3"]

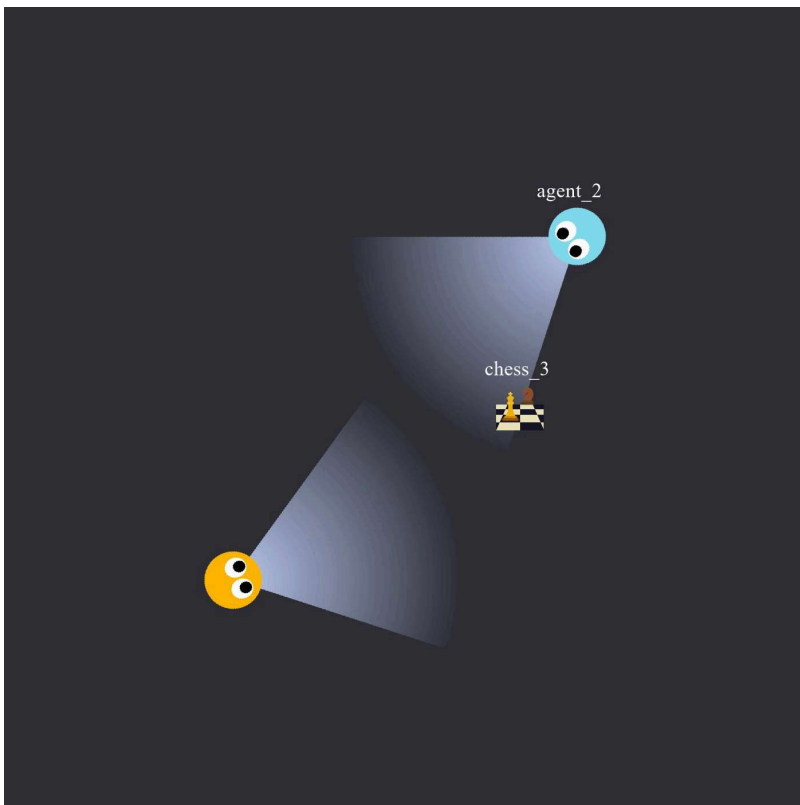

**["FollowPointing", "agent\_2"]**时agent\_2 正在pointing，你扮演的智能体会看向agent\_2指向的方向

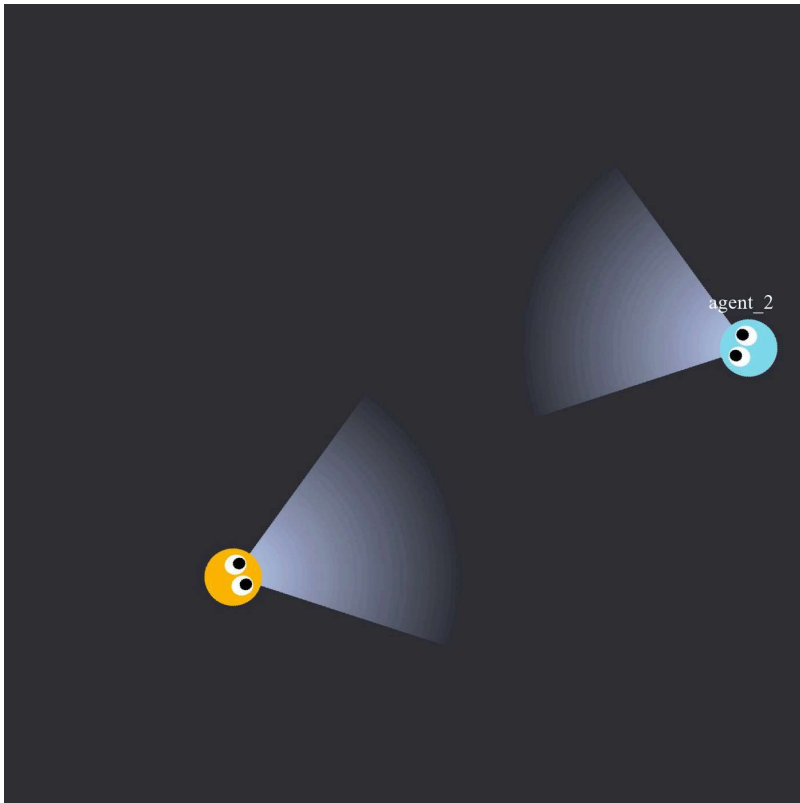

错误！

图中的动作是 ["PointTo", "chess\_3"]

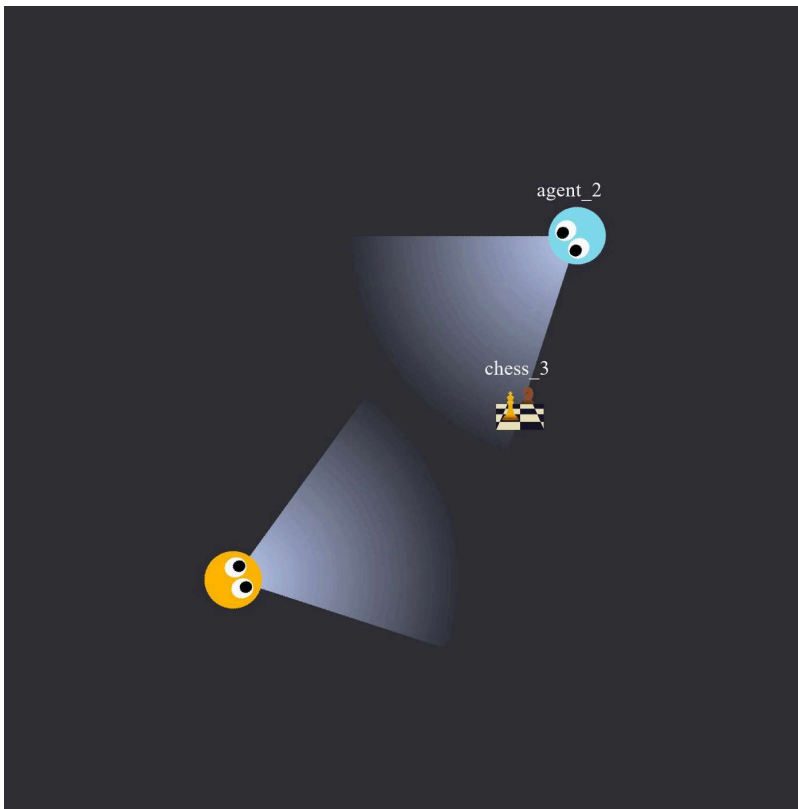

**["PointTo", "agent\_2"]**时你扮演的智能体应该指向agent\_2

**q1-8**

下面哪个图对应动作 ["Eat", "banana\_3"]?

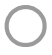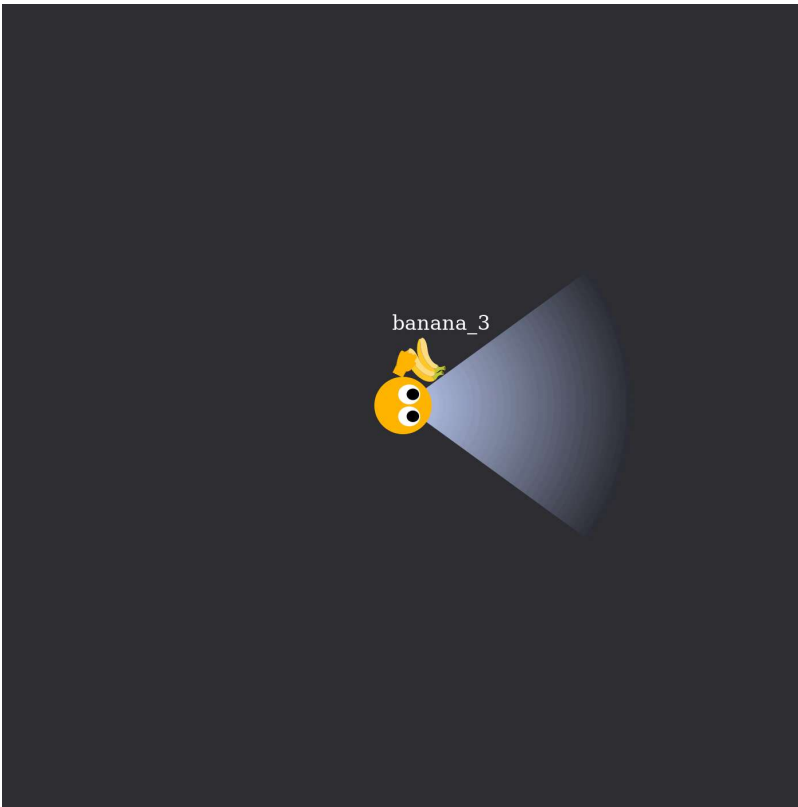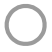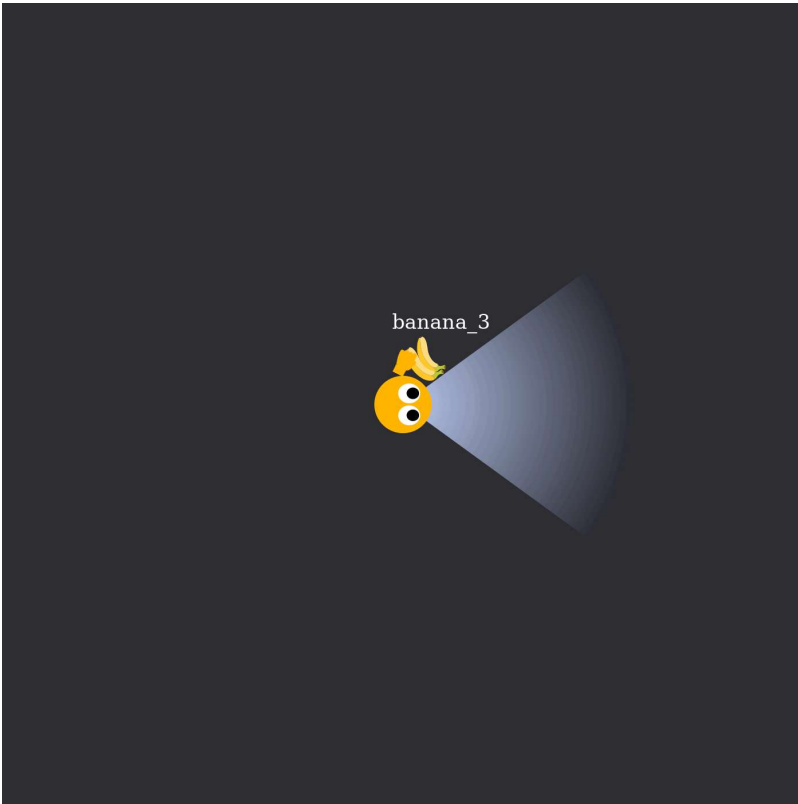

正确！

图中的动作正是 **["Eat", "banana\_3"]**

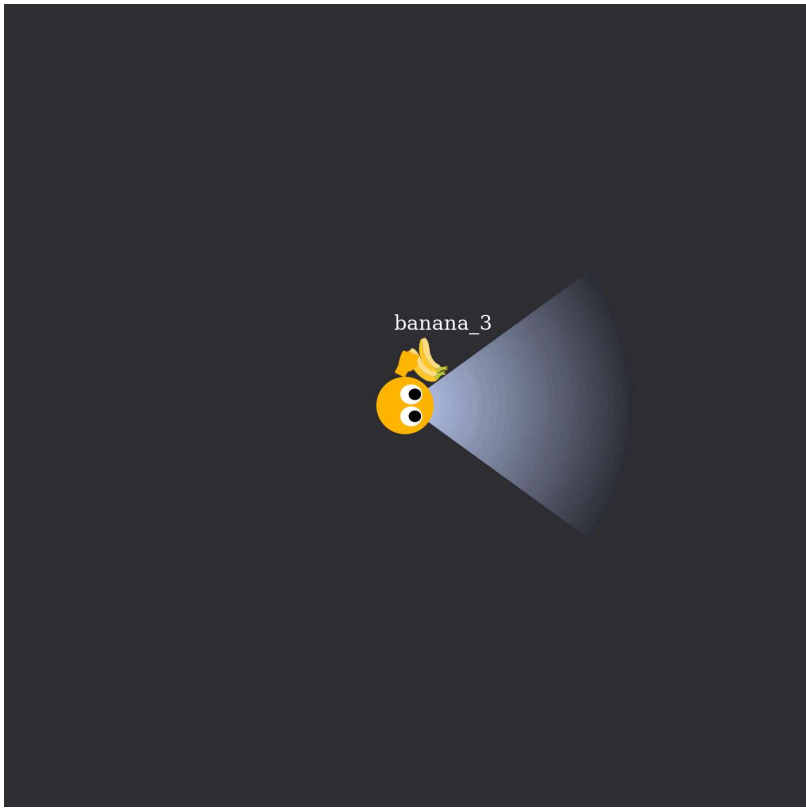

错误!

图中的动作是 **["PutDown", "banana\_3", "ground"]**

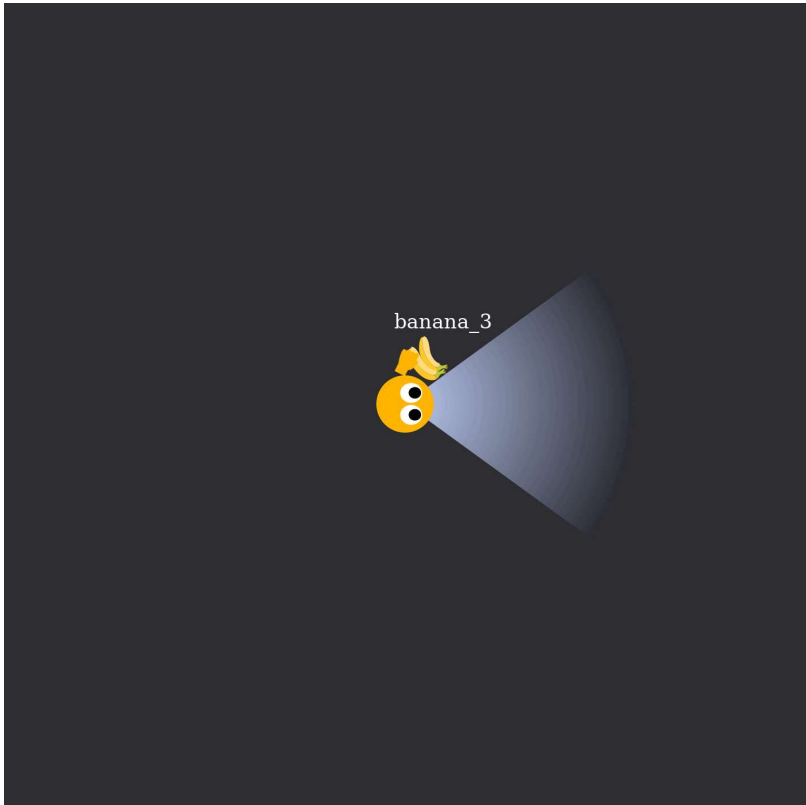

而下图中的动作才是 **["Eat", "banana\_3"]**  
注意此时你扮演的智能体先将香蕉放到了口边

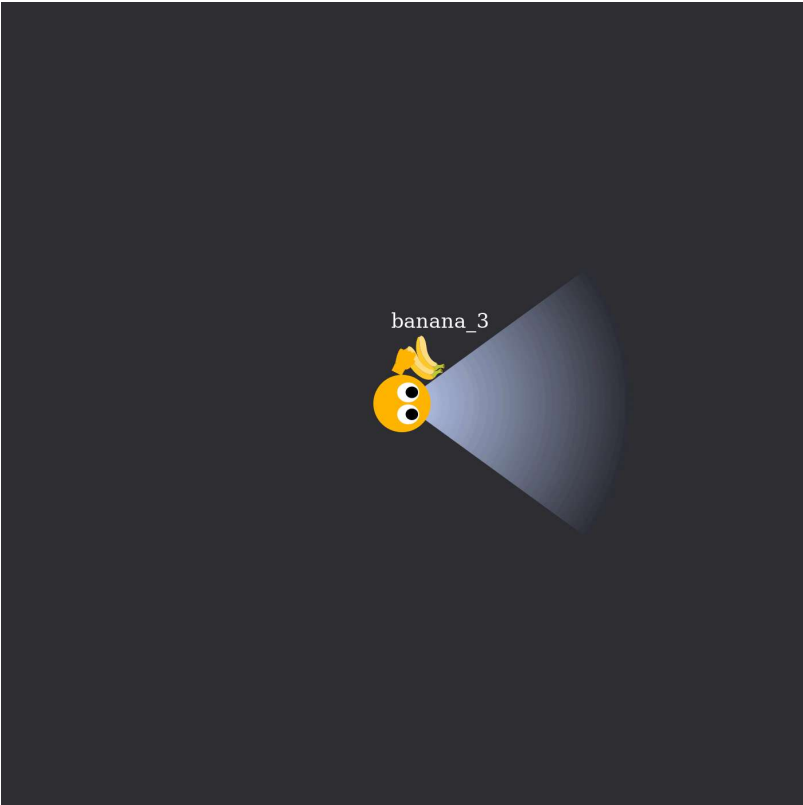

**q1-9**

下图中的动作是什么？

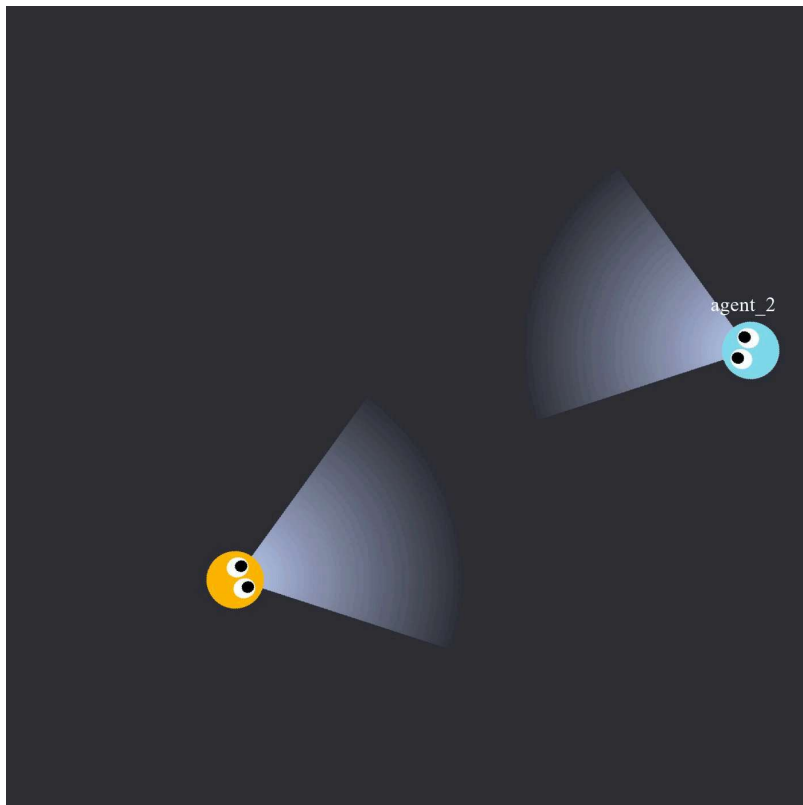

- ☐ ["RotateTo", "banana\_3"]
- ☐ ["FollowPointing", "agent\_2"]

正确！

图中的动作正是 **["FollowPointing", "agent\_2"]**

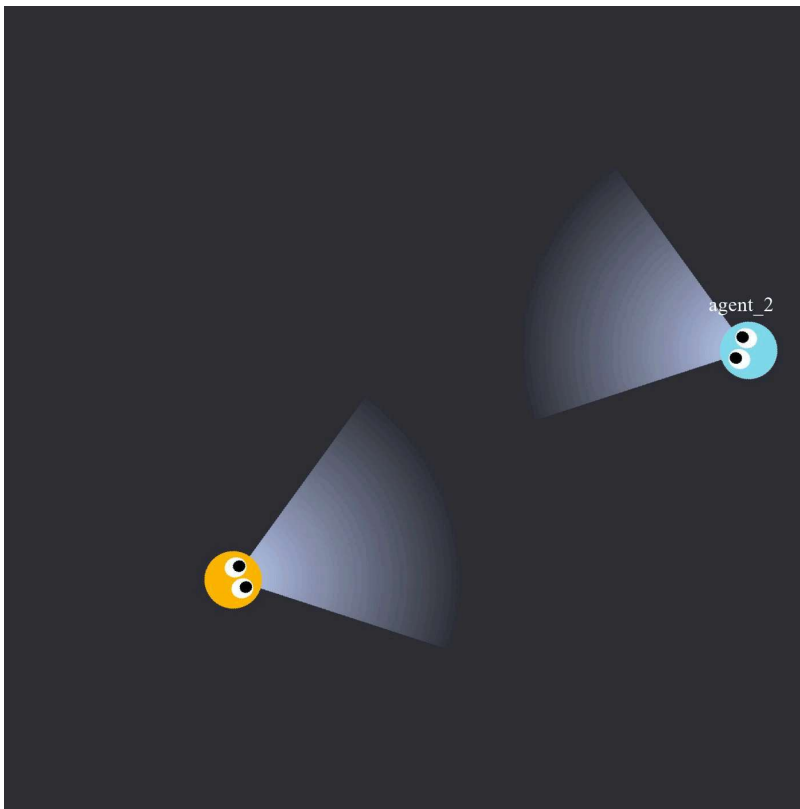

错误！

**["RotateTo", "banana\_3"]**要求你之前知道banana\_3的位置，类似下图👉

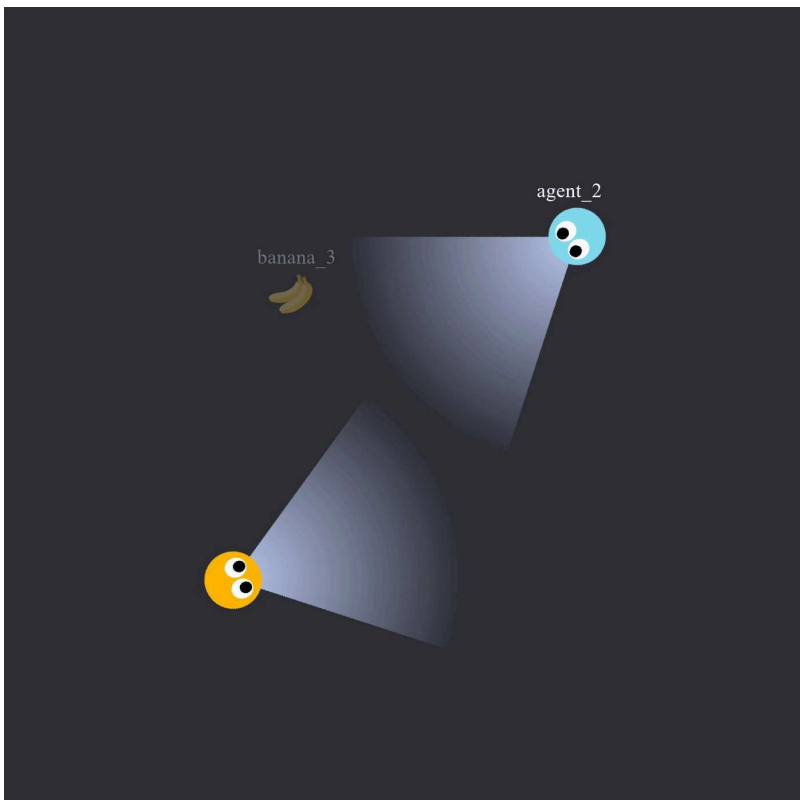



但是题目问的动作（见下图👉）是 **["FollowPointing", "agent\_2"]**



请注意这两者的区别！

## q2-1

为什么有些物体是半透明的？请从下面选项中选出最佳的一个解释：

- ☐ 因为它们本来就是半透明的。
- ☐ 因为虽然它们当前不在小黄人的注意力视野中，但它们在小黄人的信念中。
- ☐ 因为它们在小黄人的信念中。

○ 因为它们不在小黄人的注意力视野中。

正确！

物体是半透明的，是因为虽然它们当前不在小黄人的注意力视野中，但它们在小黄人的信念中。

错误！

我们的场景中不会出现“本来就半透明”的物体。

物体是半透明是因为虽然它们当前不在小黄人的注意力视野中，但它们在小黄人的信念中。

错误！

在小黄人的信念中的物体不一定是半透明的，如果它同时在小黄人的注意力视野中，它应该是亮颜色的。

物体是半透明是因为虽然它们当前不在小黄人的注意力视野中，但它们在小黄人的信念中。

错误！  
不在小黄人注意力视野中的物体不一定是半透明的，还可能根本没有显示。

物体是半透明是因为虽然它们当前不在小黄人的注意力视野中，但它们在小黄人的信念中。

q2-2

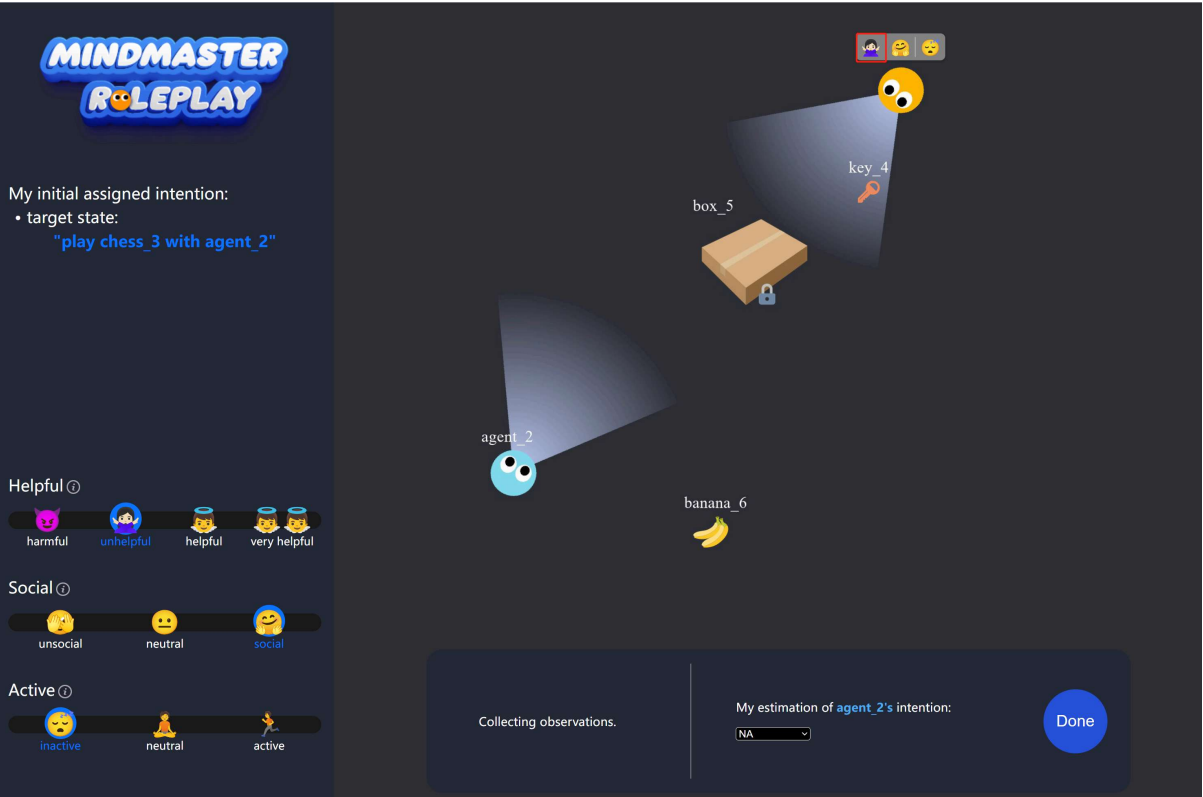

请问上图中小黄人旁边用红色框起来的表情代表了哪一个价值取值？

☐ unsocial

- ☐ neutral
- ☐ inactive
- ☐ unhelpful

错误！

这个表情并不代表 unsocial 的价值。完整的价值取值与表情的对应关系如下：

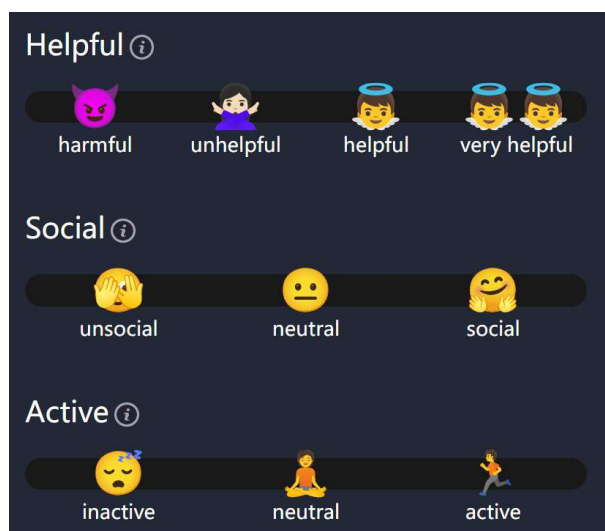

正确！

这个表情确实代表了 unhelpful 的价值。完整的价值取值与表情的对应关系如下：

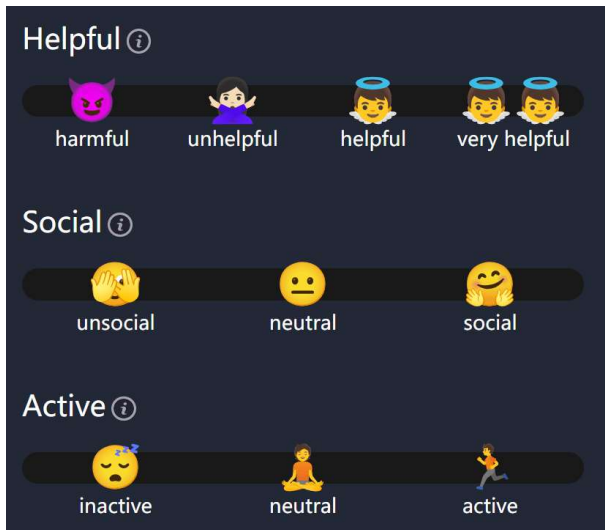

错误！

这个表情并不代表 inactive 的价值。完整的价值取值与表情的对应关系如下：

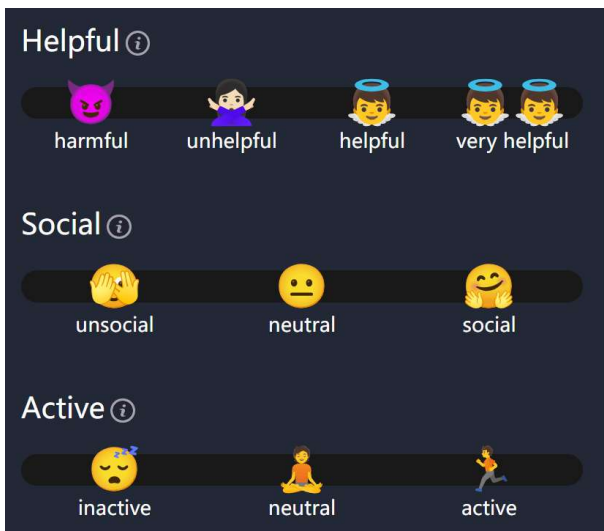

错误！

这个表情并不代表 neutral 的价值。完整的价值取值与表情的对应关系如下：

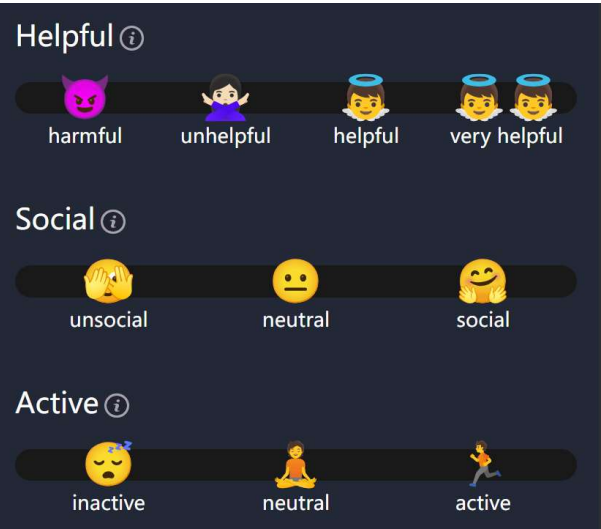

q2-3

小黄人价值分布如下图所示，小黄人的初始意图是 ['PutInto', 'books\_5', 'box\_7']，请问下面哪一个是最优策略？

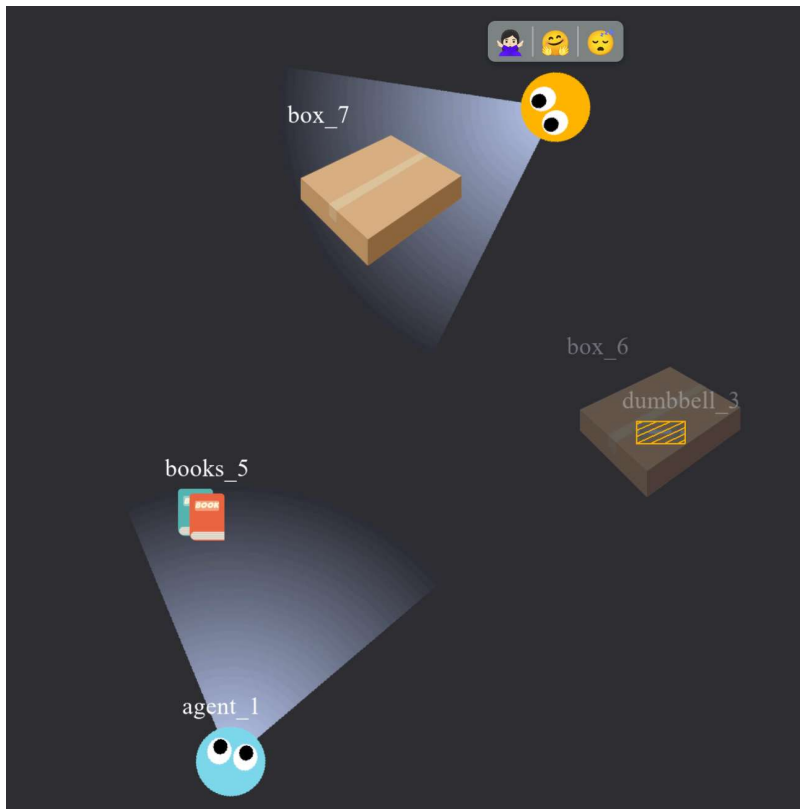

下图供您作为图例参考：

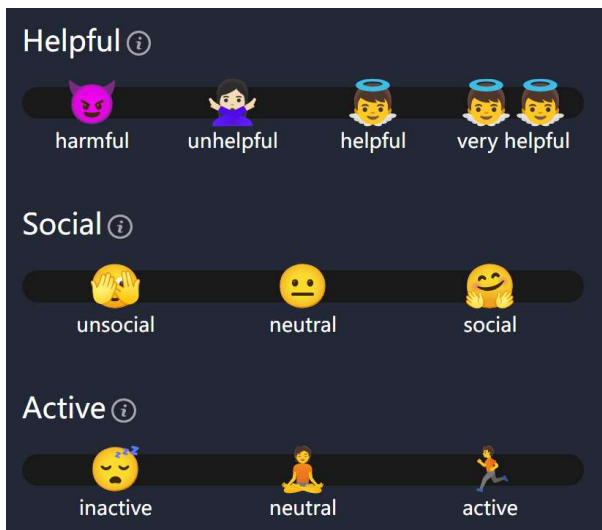

- ☐ 将小黄人的意图变为['RequestHelp', 'agent\_1', 'PutInto', 'books\_5', 'box\_7']，请求agent\_1来帮小黄人完成这个意图。
- ☐ 保持初始意图['PutInto', 'books\_5', 'box\_7']不变，小黄人自己完成这个意图。
- ☐ 看看另外一个智能体在干什么，将小黄人的意图改为去帮助它完成它的意图。
- ☐ 将小黄人的意图变为'none'，什么都不做了。

错误！

自己完成意图虽然可以完成初始意图，但是不符合小黄人“social（社交的）”和“inactive（不好动的）”的价值设定。

小黄人是 social（社交的） 的同时又 inactive（不好动的），寻求另一个智能体的帮助是最佳策略，这样既可以完成初始意图，也符合价值分布，是最佳策略。

错误！

小黄人有初始意图，“什么都不做”虽然符合小黄人的价值分布“inactive（不好动的）”，但是同时既没有完成初始意图，也不符合小黄人的价值分布中的“social（社交的）”，不是最佳策略。

小黄人是 social（社交的） 的同时又 inactive（不好动的），寻求另一个智能体的帮助是最佳策略，这样既可以完成初始意图，也符合价值分布，是最佳策略。

正确！

小黄人是 social（社交的） 的同时又 inactive（不好动的），寻求另一个智能体的帮助是最佳策略，这样既可以完成初始意图，也符合价值分布，是最佳策略。



求另一个智能体的帮助是最佳策略，这样既可以完成初始意图，也符合价值分布，是最佳策略。

错误！

帮助别人既无法完成小黄人的初始意图，也并不符合小黄人的 unhelpful（不助人的）的价值设定。

小黄人是 social（社交的）的同时又 inactive（不好动的），寻求另一个智能体的帮助是最佳策略，这样既可以完成初始意图，也符合价值分布，是最佳策略。

## q2-4

如果你估计出另一个智能体的“最高层意图”是在找一个东西，但不确定他在找什么，只知道他现在的“子意图”是想走到box\_2那里，请问你在这一步估计对方意图的时候应该填哪一个意图？

- ☐ ['Find', 'box\_2']
- ☐ ['NA']
- ☐ ['Find', 'NA']
- ☐ ['Open', 'box\_2']

错误！

对方可能是要去寻找box\_2里面装着的另一个东西。

当你推测对方在寻找某物但不确定具体是什么时，['Find', 'NA']是最合适的表达方式，表示你知道对方有寻找的意图但不确定具体目标。

错误！

Open box\_2 仅描述了子意图，而不是你推测出的背后的高层意图“Find something”。

当你推测对方在寻找某物但不确定具体是什么时，['Find', 'NA']是最合适的表达方式，表示你知道对方有寻找的意图但不确定具体目标。

正确！

当你推测对方在寻找某物但不确定具体是什么时，['Find', 'NA']是最合适的表达方式，表示你知道对方有寻找的意图但不确定具体目标。

错误！

NA 表示你对对方的意图毫无推测，但实际上你推测到对方可能在寻找某物，只是不知道具体是什么。

这种情况下，['Find', 'NA'] 是最合适的表达方式，表示你知道对方有寻找的意图但不确定具体目标。

## q2-5

如果小黄人现在的“最高层意图”是 ['Open', 'box\_3'] (box\_3 现在是 locked 的状态)，现在正在做一个子意图 ['Get', 'key\_2']，请问在这一步报告小黄人意图的时候，应该填哪一个意图？

- ☐ ['Get', 'key\_2']
- ☐ ['Open', 'box\_3']
- ☐ ['NA']
- ☐ ['Find', 'key\_2']

错误！

虽然小黄人当前执行的子意图是 ['Get', 'key\_2']，但报告时应反映小黄人的高层意图 ['Open', 'box\_3']，而不是子意图。

正确！

应该报告小黄人当前的高层意图 ['Open', 'box\_3']。

错误！

NA 表示小黄人没有明确的意图，而实际上小黄人是在执行 ['Open', 'box\_3'] 的高层意图。

错误！

也许 ['Find', 'key\_2'] 是进一步分解出来的子意图，但报告时应反映小黄人的高层意图 ['Open', 'box\_3']，而不是具体的子意图。

## q2-6

请问意图 ['RequestHelp', 'agent\_2', 'PutInto', 'box\_3',

'shelf\_4']是什么意思？

- ☐ request agent\_2's help to put box\_3 into shelf\_4
- ☐ request agent\_2's help to put shelf\_4 into box\_3
- ☐ agent\_2 requests help to put box\_3 into shelf\_4
- ☐ agent\_2 requests help to put shelf\_4 into box\_3

错误！

这个意图不是 agent\_2 请求帮助，而是请求 agent\_2 提供帮助。

正确！

这个意图是请求 agent\_2 的帮助把 box\_3 放入 shelf\_4。

错误！

这个意图不是 agent\_2 请求帮助，而是请求 agent\_2 提供帮助；而且是将 box\_3 放入 shelf\_4，而不是将 shelf\_4 放入 box\_3。

错误!

目标是将 box\_3 放入 shelf\_4，而不是将 shelf\_4 放入 box\_3。

## q2-7多选

(多选) 如果小黄人想移动到shelf\_6，应该选择什么动作？

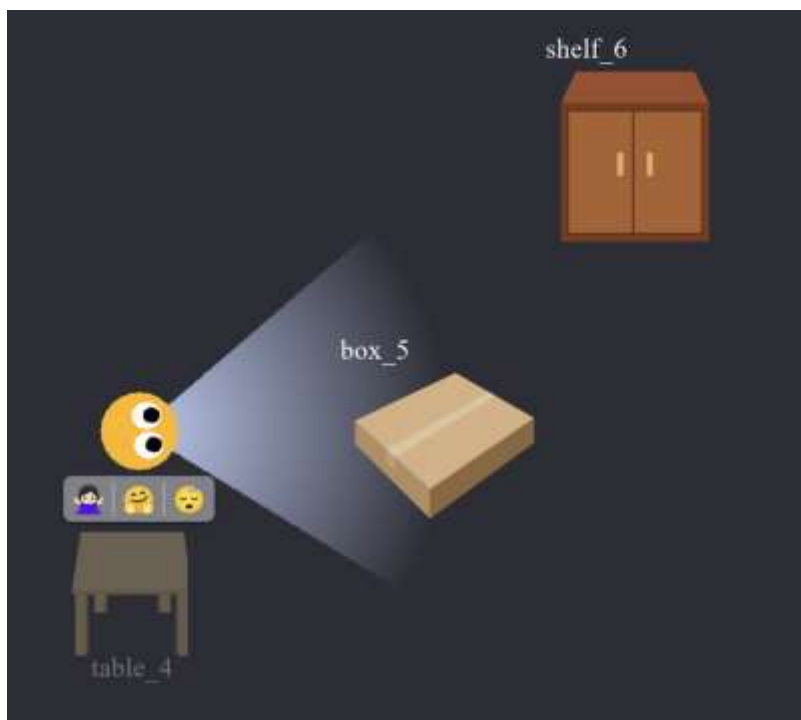

- ☐ 选择['RotateTo','box\_5']
- ☐ 选择['PointTo','shelf\_6']
- ☐ 选择 ['MoveTo','shelf\_6']
- ☐ 选择 ['MoveTo','X: Y:'], 然后用鼠标将红色圆圈点在shelf\_6上

正确！

选择 MoveTo 并指定 shelf\_6 或使用 MoveTo 然后鼠标点击目标位置，都是将小黄人移动到 shelf\_6 的合法有效方式。

错误！

要移动到 shelf\_6，你需要选择 MoveTo 相关的动作，即选择 MoveTo 并指定 shelf\_6，或者选择 MoveTo 然后鼠标点击目标位置。

错误！

这是一道多选题！

对于“MoveTo”和“RotateTo”这两个动作，您有两种方式选择目的地：

1. 选择某一个物体或者智能体
2. 选择“X: Y:”，然后用鼠标（这时会出现一个红色圆圈）将红色圆圈点在目标位置/方向

错误！

这是一道多选题！

对于“MoveTo”和“RotateTo”这两个动作，您有两种方式选择目的地：

1. 选择某一个物体或者智能体
2. 选择“X: Y:”，然后用鼠标（这时会出现一个红色圆圈）将红色圆圈点在目标位置/方向

## q2-8多选

**（多选）** 你需要推测另一个智能体的价值/意图，但是你完全不知道。你应该做什么？请选择两项（这是一个多选题！）

- ☐ 任意选择一个选项。
- ☐ 选择“NA”。
- ☐ 如果这与小黄人的意图和价值不冲突，在接下来的步骤中收集更多观察结果。
- ☐ 即使这与小黄人的意图和价值相冲突，也要在接下来的步骤中收集更多观察结果。

正确！



选择“NA”表示暂时不做出假设，或者在跟角色意图和价值不冲突的情况下继续收集信息，是推测对方价值或意图的最佳策略。

错误！

这是一个多选题！

选择“NA”表示暂时不做出假设，或者在跟角色意图和价值不冲突的情况下继续收集信息，是推测对方价值或意图的最佳策略。

错误！

这是一个多选题！

选择“NA”表示暂时不做出假设，或者在跟角色意图和价值不冲突的情况下继续收集信息，是推测对方价值或意图的最佳策略。

错误！

要推测对方的价值或意图，但暂时没有足够的观测，你应该选择“NA”并且在不与角色意图和价值冲突的前提下收集更多信息。

## q2-9

你需要在每一步选择小黄人的意图，你应该：

- ☐ 坚持执行分配给小黄人的意图。
- ☐ 根据场景和你个人的价值调整小黄人的意图。
- ☐ 根据场景和分配给小黄人的价值调整小黄人的意图。
- ☐ 随意选择一个新的意图。

正确！

你应该根据当前的场景和小黄人的价值来选择小黄人的意图。

错误！

虽然执行分配给小黄人的初始意图很重要，但场景和小黄人的价值也必须考虑。你需要根据实际具体情况做出调整，而不是一定要一成不变地执行分配的初始意图。

错误！

这是一个角色扮演游戏！你应该根据小黄人的价值而不是你个人的价值来选择小黄人的意图。

错误！

不能随意选择新的意图。

你应该根据当前的场景和小黄人的价值来选择小黄人的意图。

## q2-10

你需要在每一步选择小黄人的动作，你应该：

- ☐ 根据小黄人的更新后的意图和分配的价值选择小黄人的行动。
- ☐ 根据分配给小黄人的初始意图选择小黄人的行动。
- ☐ 根据分配给小黄人的初始意图和价值选择小黄人的行动。
- ☐ 根据你个人的意图和价值选择小黄人的行动。

正确！

应当基于小黄人**更新后的意图**和**分配的价值**来选择小黄人的行动。

错误！

这是一个角色扮演游戏！

你需要根据小黄人的意图和价值，而不是你个人的意图和价值来选择小黄人的行动。

错误！

应当基于小黄人**更新后的意图**和**分配给小黄人的价值**来选择小黄人的行动。

错误！

应当基于小黄人**更新后的意图**和**分配给小黄人的价值**来选择小黄人的行动。

## q2-11多选

**(多选)** 要获得游戏的最终奖励，你应该：（请在每一组里面选择一个最合适的选项，一共选择三个选项！）

- ☐ （第一组）尽力与其他智能体合作，不管小黄人的价值是否为helpful。
- ☐ （第一组）根据你个人的价值行动，不管小黄人是什么价值设定。
- ☐ （第一组）根据小黄人的价值行动，时刻记得一个角色扮演游戏。
- ☐ （第二组）尽力实现分配给小黄人的初始意图，即使你已经更新了意图。
- ☐ （第二组）尽力实现小黄人更新后的意图。
- ☐ （第三组）当小黄人的价值和意图冲突时，以意图为先。
- ☐ （第三组）当小黄人的价值和意图冲突时，以价值为先。
- ☐ （第三组）当小黄人的价值和意图冲突时，只要是全身心投入角色的设定和当时的具体情境，认真思考并作出合理决策即可。

正确！

结合小黄人的价值、更新后的意图和当前情境来做出合理决策；  
当小黄人的价值和意图冲突时，只要是全身心投入角色的设定和当时的具体情境，认真思考并作出合理决策即可。

错误！

结合小黄人的价值、更新后的意图和当前情境来做出合理决策；  
当小黄人的价值和意图冲突时，只要是全身心投入角色的设定和当时的具体情境，认真思考并作出合理决策即可。

错误！

这是一个多选题！

结合小黄人的价值、更新后的意图和当前情境来做出合理决策；  
当小黄人的价值和意图冲突时，只要是全身心投入角色的设定和当时的具体情境，认真思考并作出合理决策即可。

## Q1-1

哪个智能体是你需要扮演的？

- ☐ 写有“me”标签的智能体
- ☐ 黄色的智能体
- ☐ 在中间的智能体

正确！

**黄色**的智能体是你需要扮演和控制的。

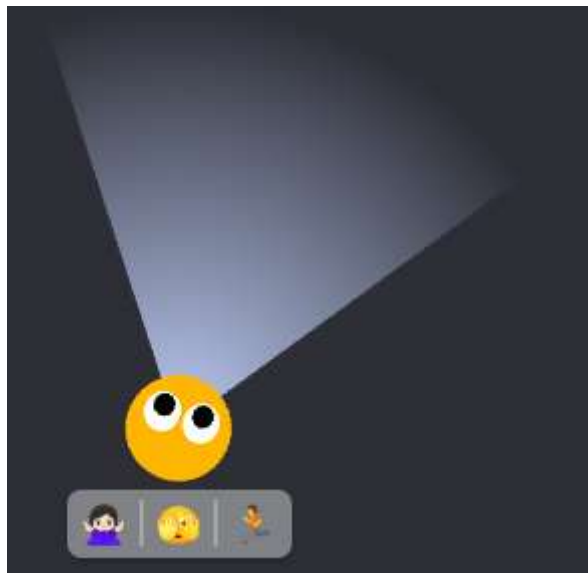

错误！

智能体会移动位置，不一定在中间。

黄色的智能体是你需要扮演和控制的。

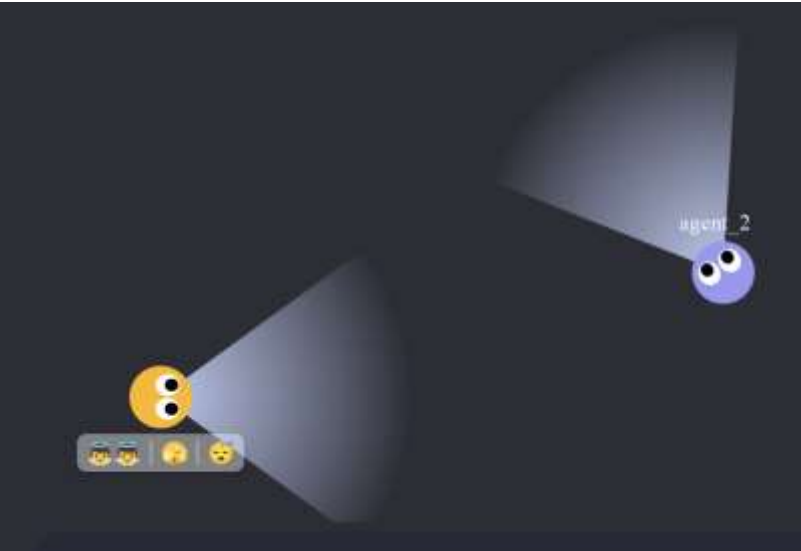

错误！  
你扮演的智能体没有写标签，需要靠颜色来区分。

黄色的智能体是你需要扮演和控制的。

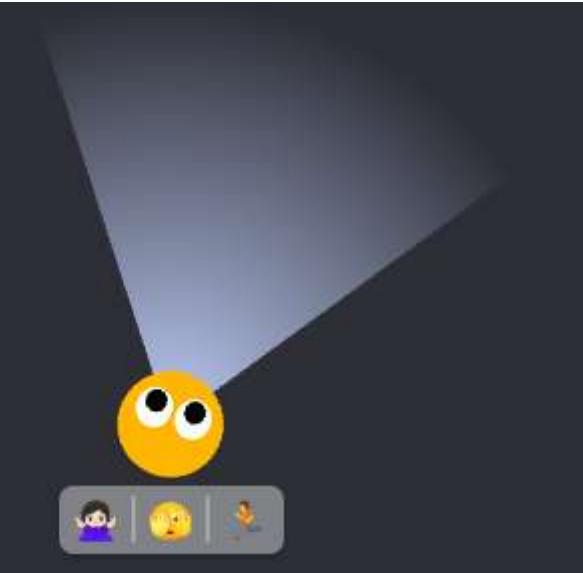



在下面的场景中，“小黄人”能看到什么？

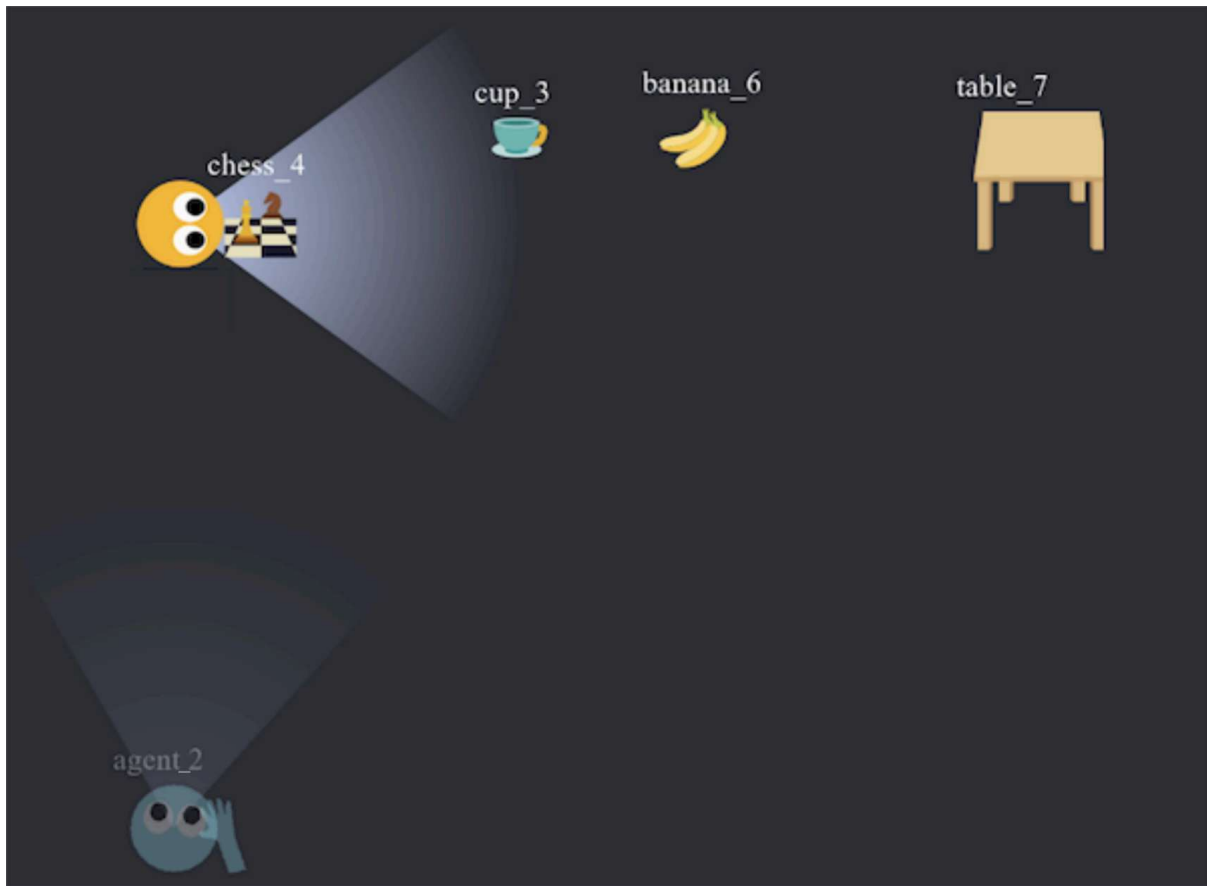

- ☐ chess\_4, cup\_3, banana\_6, table\_7 and agent\_2
- ☐ chess\_4
- ☐ chess\_4, cup\_3, banana\_6 and table\_7
- ☐ chess\_4 and cup\_3

正确！

图中的扇形表示智能体的注意力方向和视野范围。

虽然图中只绘制了一个扇形，但实际情况下，智能体的注意力覆盖了两条射线之间的整个区域，并且可以看到视线范围内尽可能

远的目标。



错误！

小黄人不仅可以看到chess\_4， 还可以看到cup\_3, banana\_6和table\_7

图中的扇形表示智能体的注意力方向和视野范围。

虽然图中只绘制了一个扇形，但实际情况下，**智能体的注意力覆盖了两条射线之间的整个区域，并且可以看到视线范围内尽可能**

远的目标。



错误！

小黄人不仅可以看到chess\_4和cup\_3， 还可以看到  
banana\_6和table\_7

图中的扇形表示智能体的注意力方向和视野范围。

虽然图中只绘制了一个扇形，但实际情况下，**智能体的注意力覆盖了两条射线之间的整个区域，并且可以看到视线范围内尽可能**

远的目标。



错误！

你所扮演的智能体看不到agent\_2, agent\_2不在扇形的两条射线范围内

图中的扇形表示智能体的注意力方向和视野范围。虽然图中只绘制了一个扇形，但实际情况下，**智能体的注意力覆盖了两条射线之间的整个区域，并且可以看到视线范围内尽可能远的目标。**



### Q1-3

下面哪个图对应动作 ["Grab", "key\_3"]?

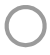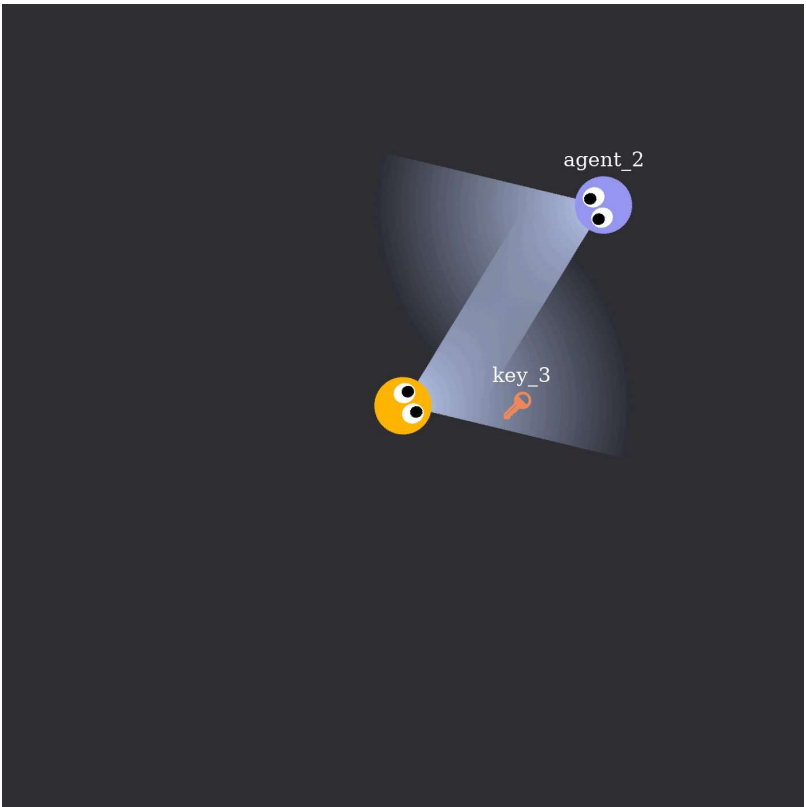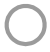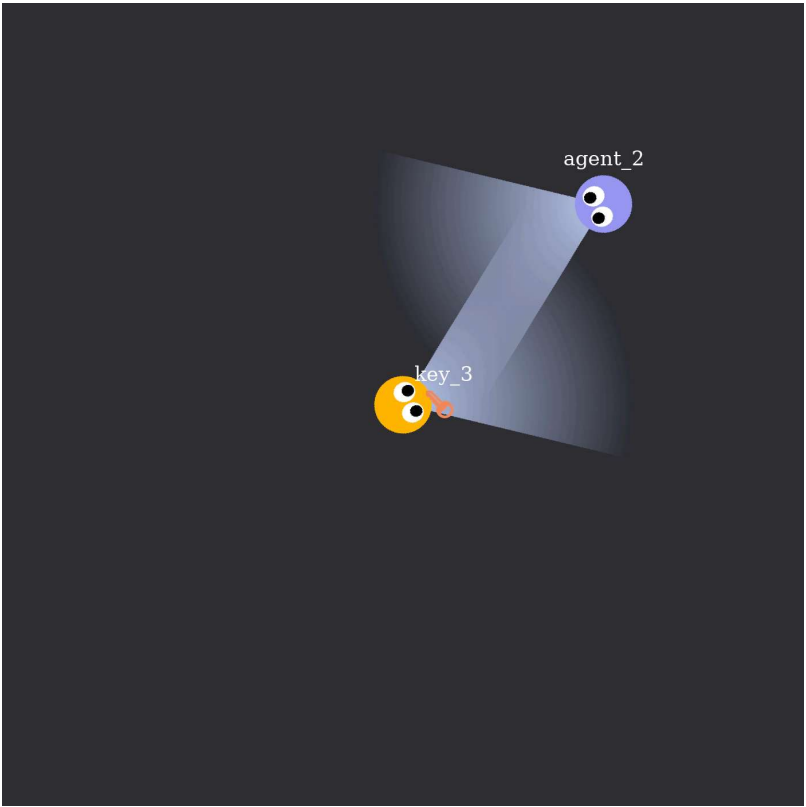

正确!

下面的图对应动作["Grab", "key\_3"]



错误！  
下面的图才是动作["Grab", "key\_3"]



你选择的这个图对应的动作是["MoveTo", "key\_3"]



## Q1-4多选

**(多选)** 如果你扮演的小黄人不在其他智能体的注意力范围内，如何吸引他/她的注意力？

- ☐ Speak
- ☐ WaveHand
- ☐ NodHead
- ☐ MoveToAttention



正确！

如果你扮演的智能体不在其他智能体的注意力范围内，你可以用MoveToAttention的动作或者Speak的动作吸引他/她的注意力，前者他/她可以看到你，后者他/她可以听到你。

动作WaveHand和NodHead不行，因为你扮演的智能体不在其他智能体的注意力范围内，做这两个动作其他智能体看不到，无法吸引他/她的注意力。

错误！

这是一个多选题。

如果你扮演的智能体不在其他智能体的注意力范围内，除了用MoveToAttention的动作之外，你还可以用Speak的动作吸引他/她的注意力，他/她可以听到你。

错误！

这是一个多选题。

如果你扮演的智能体不在其他智能体的注意力范围内，除了用

Speak的动作之外，你还可以用MoveToAttention的动作吸引他/她的注意力，他/她可以看到你。

**错误！**

动作WaveHand和NodHead不行，因为你扮演的智能体不在其他智能体的注意力范围内，做这两个动作其他智能体看不到，无法吸引他/她的注意力。

## **Q1-5**

下图中的动作是什么？

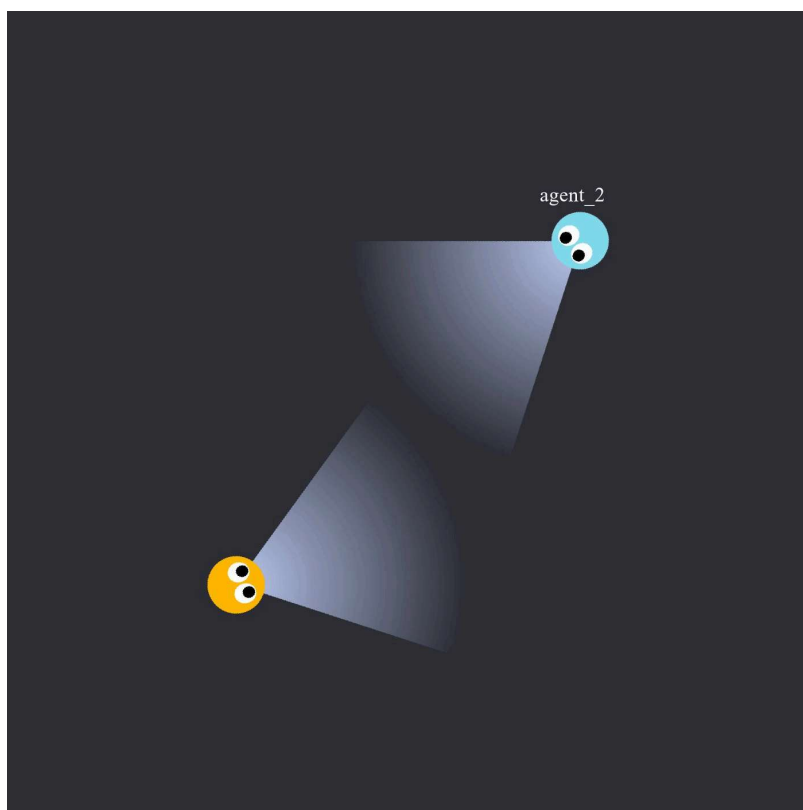

- ☐ ["NodHead", "agent\_2"]
- ☐ ["RotateTo", "agent\_2"]

正确！

下图中的动作是["NodHead", "agent\_2"]



错误！

下图中的动作是["NodHead", "agent\_2"]



动作["RotateTo", "agent\_2"]对应的图是：

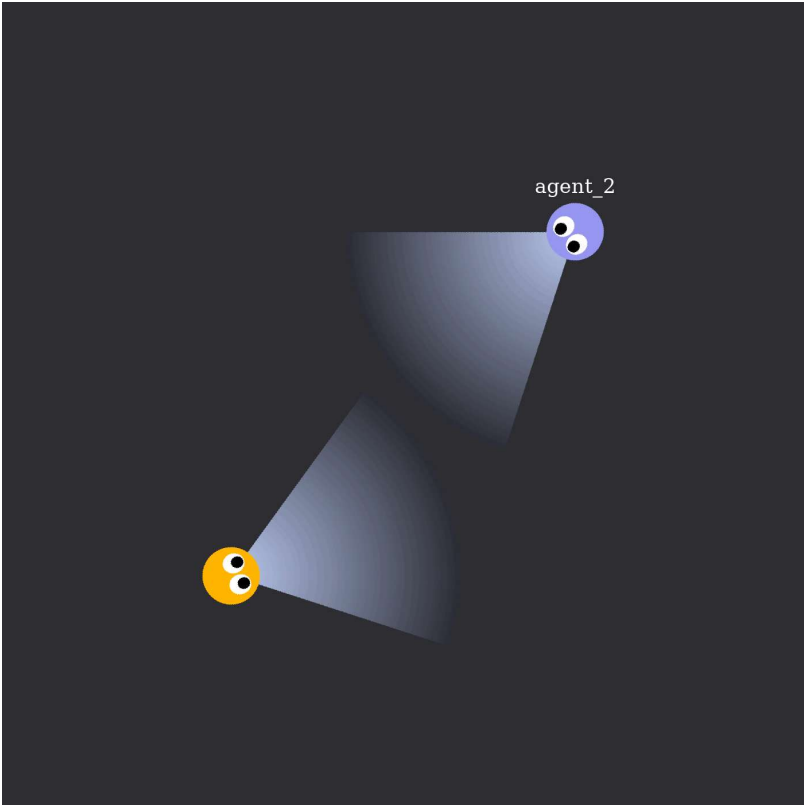

## Q1-6

下图中的动作是什么？



- ☐ ["WaveHand", "agent\_2"]
- ☐ ["Speak", "Hello"]

正确！

图中的动作正是 ["WaveHand", "agent\_2"]



错误!

图中的动作是 ["WaveHand", "agent\_2"]

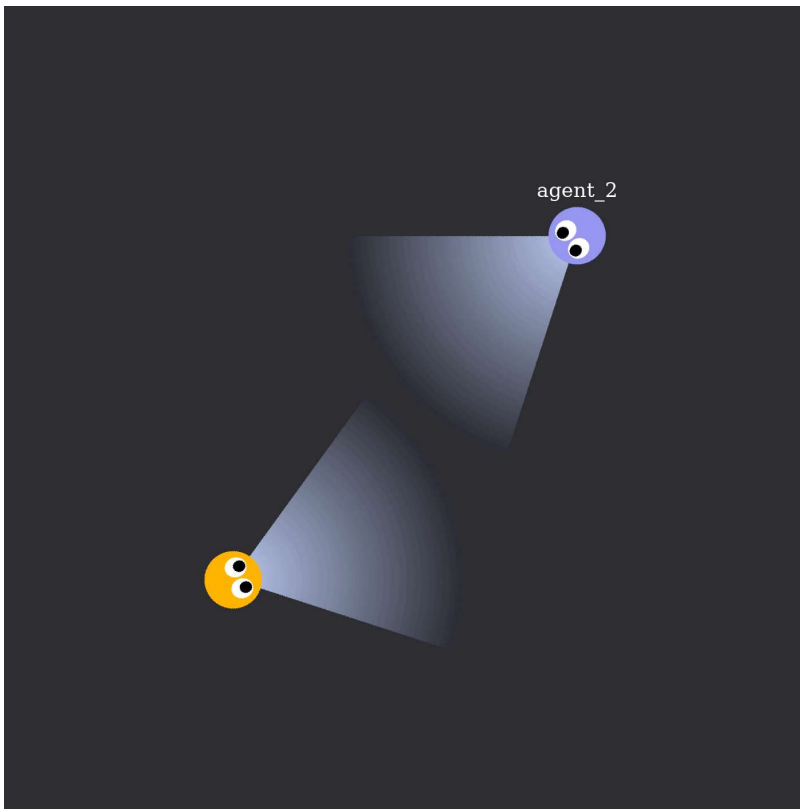

**["Speak", "Hello"]**时你扮演的智能体手部不会有动作，且屏幕上会出现hello

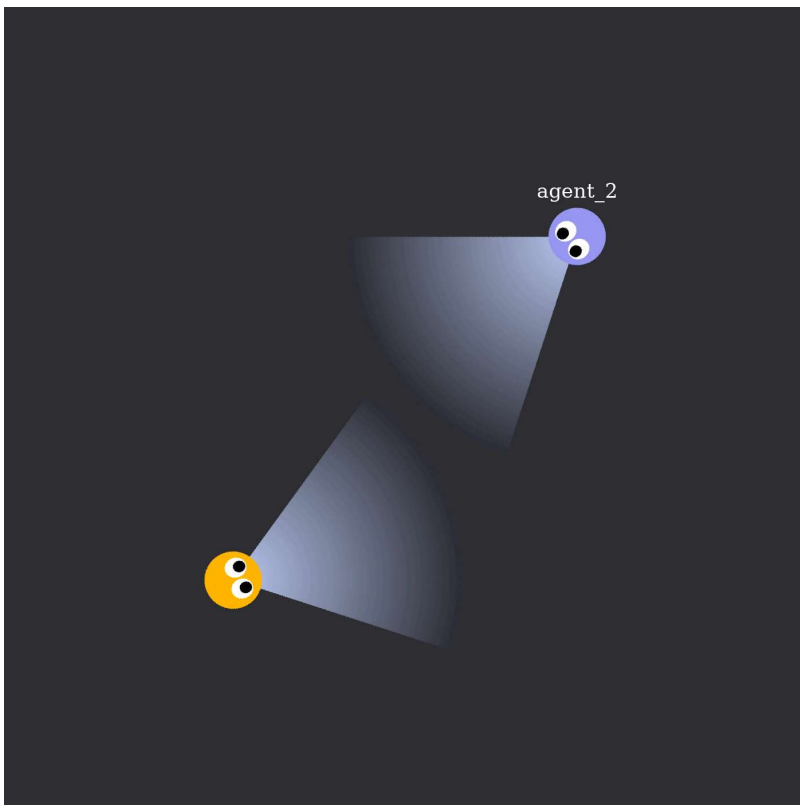



## Q1-7

下图中的动作是什么？

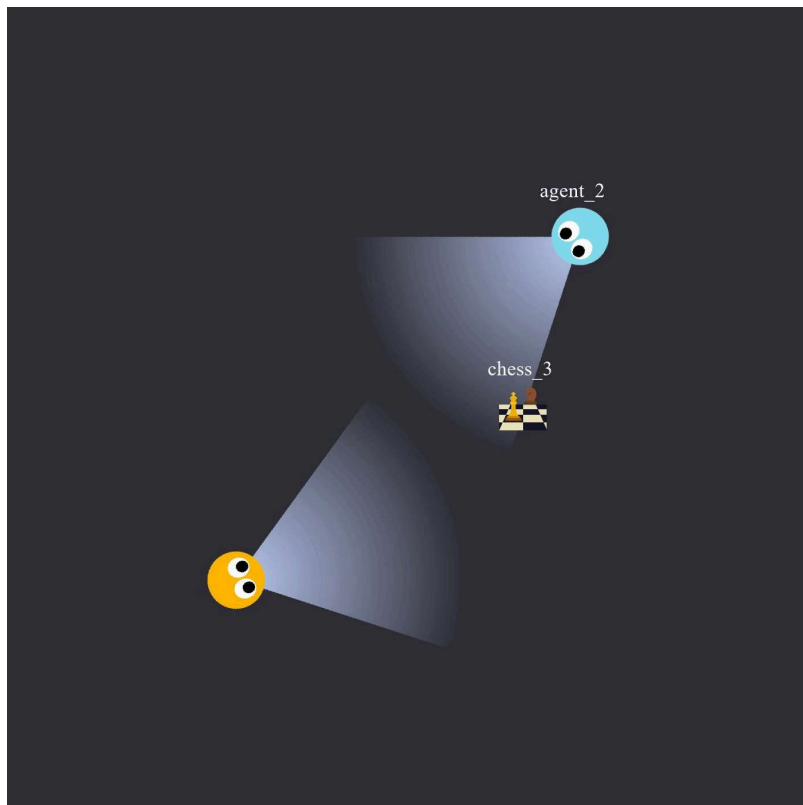

- ☐ ["FollowPointing", "agent\_2" ]
- ☐ ["PointTo", "agent\_2"]
- ☐ ["PointTo", "chess\_3"]

正确！

图中的动作正是 **["PointTo", "chess\_3"]**



错误!

图中的动作应是 ["PointTo", "chess\_3"]



**["FollowPointing", "agent\_2"]**时agent\_2 正在pointing，你扮演的智能体会看向agent\_2指向的方向



错误！

图中的动作是 ["PointTo", "chess\_3"]



**["PointTo", "agent\_2"]**时你扮演的智能体应该指向agent\_2

## Q1-8

下面哪个图对应动作 ["Eat", "banana\_3"]?

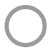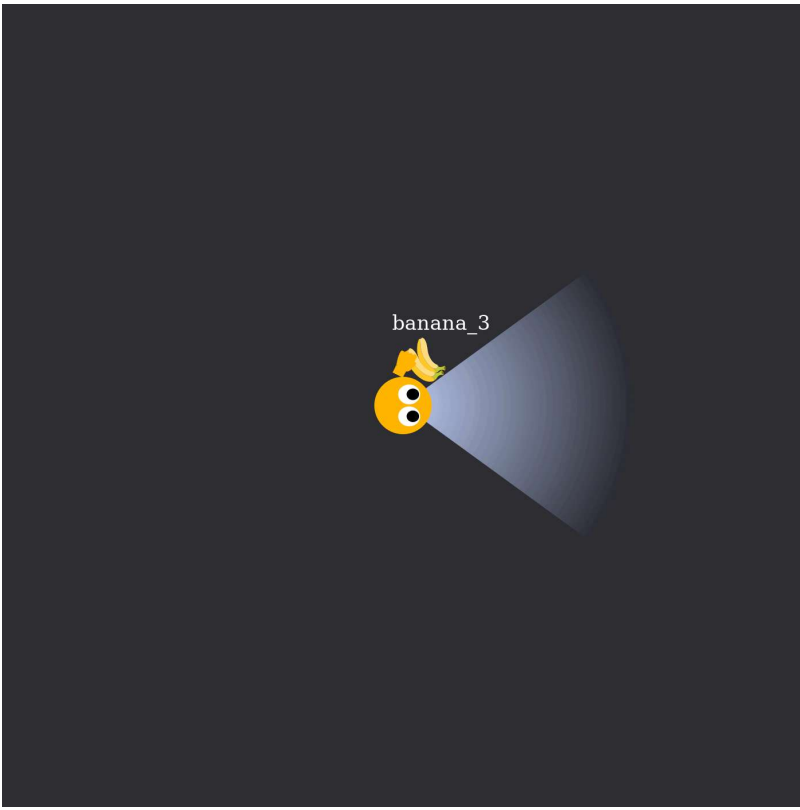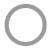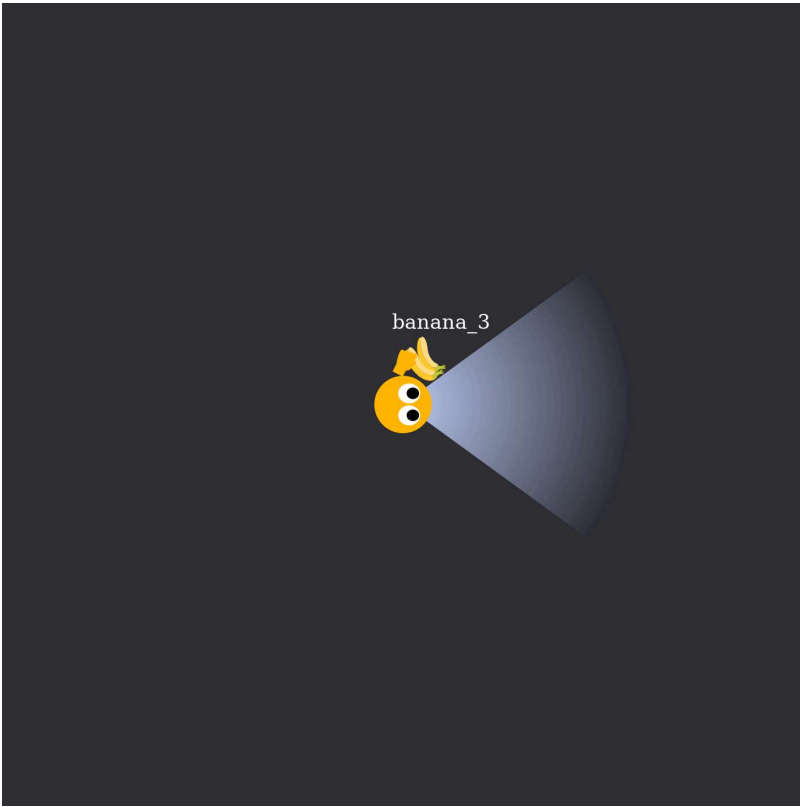

正确！

图中的动作正是 **["Eat", "banana\_3"]**



错误！  
图中的动作是 **["PutDown", "banana\_3", "ground"]**

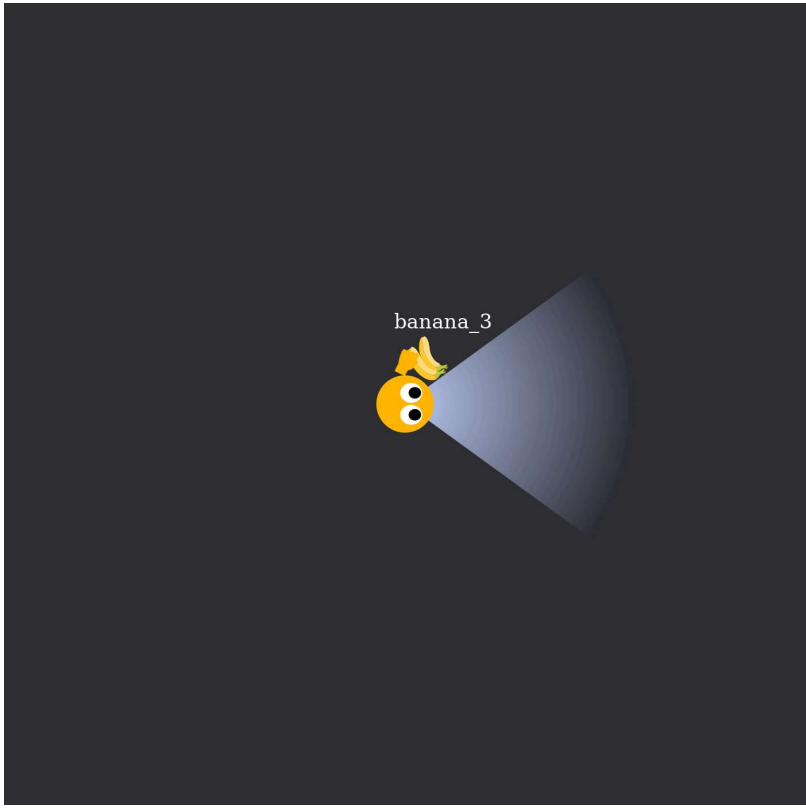

而下图中的动作才是 **["Eat", "banana\_3"]**  
注意此时你扮演的智能体先将香蕉放到了口边

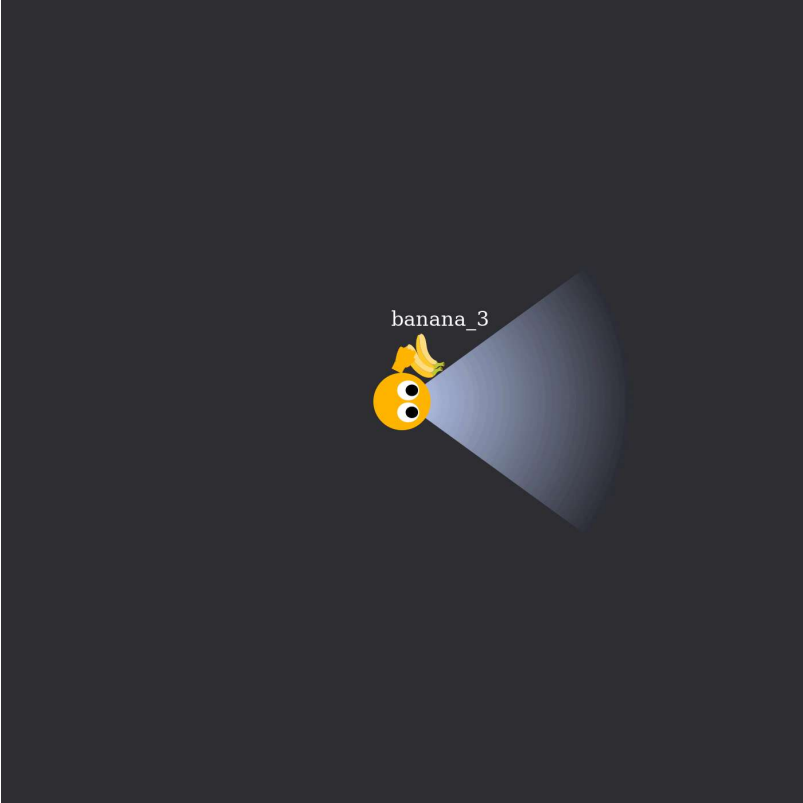

**Q1-9**

下图中的动作是什么？

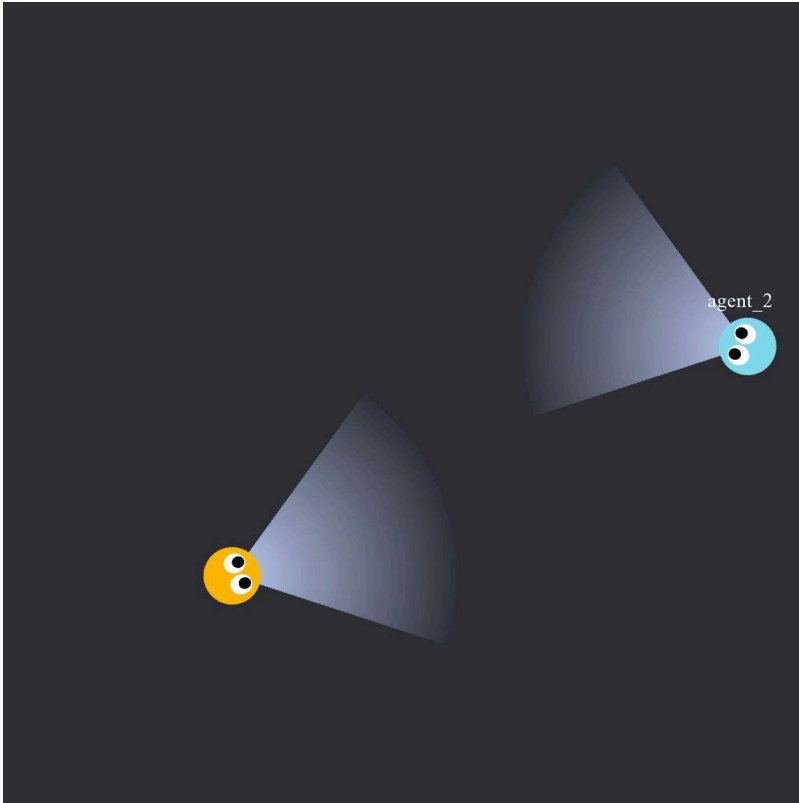

- ☐ ["RotateTo", "banana\_3"]
- ☐ ["FollowPointing", "agent\_2"]

正确！

图中的动作正是 **["FollowPointing", "agent\_2"]**





错误！

**["RotateTo", "banana\_3"]**要求你之前知道banana\_3的位置，类似下图👉



但是题目问的动作（见下图👉）是 **["FollowPointing", "agent\_2"]**

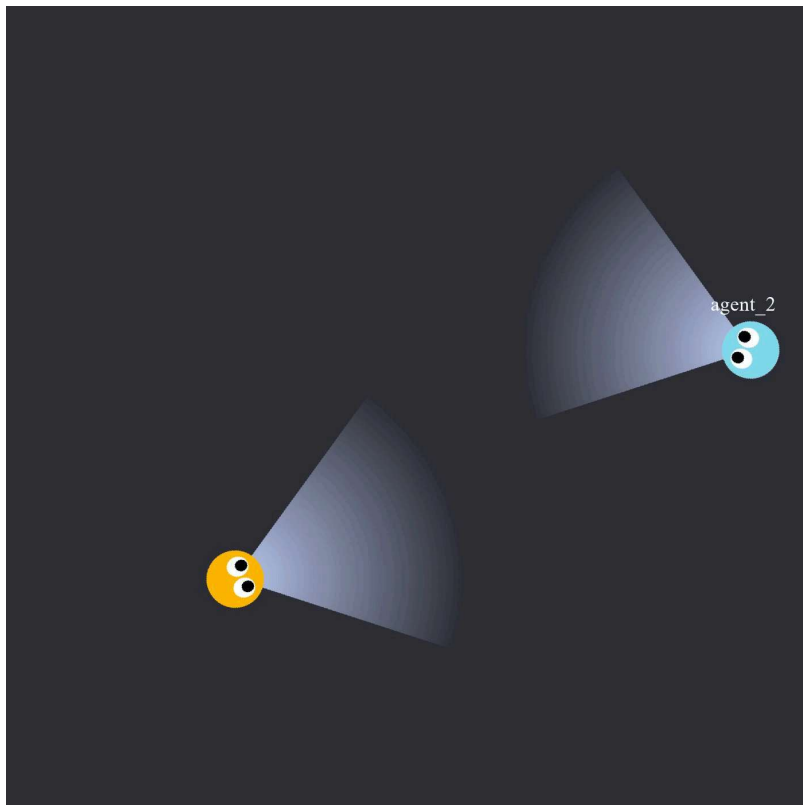

请注意这两者的区别！

## Q2-1

为什么有些物体是半透明的？请从下面选项中选出最佳的一个解释：

- ☐ 因为虽然它们当前不在小黄人的注意力视野中，但它们在小黄人的信念中。
- ☐ 因为它们不在小黄人的注意力视野中。
- ☐ 因为它们在小黄人的信念中。

○ 因为它们本来就是半透明的。

正确！

物体是半透明的，是因为虽然它们当前不在小黄人的注意力视野中，但它们在小黄人的信念中。

错误！

我们的场景中不会出现“本来就半透明”的物体。

物体是半透明是因为虽然它们当前不在小黄人的注意力视野中，但它们在小黄人的信念中。

错误！

在小黄人的信念中的物体不一定是半透明的，如果它同时在小黄人的注意力视野中，它应该是亮颜色的。

物体是半透明是因为虽然它们当前不在小黄人的注意力视野中，但它们在小黄人的信念中。

错误！  
不在小黄人注意力视野中的物体不一定是半透明的，还可能根本没有显示。

物体是半透明是因为虽然它们当前不在小黄人的注意力视野中，但它们在小黄人的信念中。

Q2-2



请问上图中小黄人旁边用红色框起来的表情代表了哪一个价值取值？

☐ neutral

- ☐ unsocial
- ☐ inactive
- ☐ unhelpful

错误！

这个表情并不代表 unsocial 的价值。完整的价值取值与表情的对应关系如下：

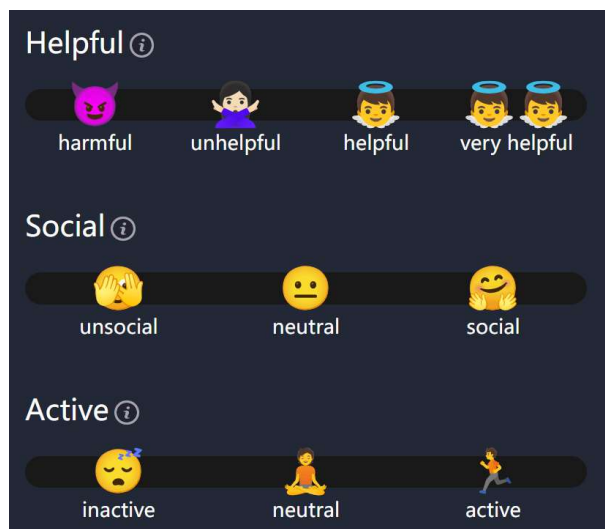

正确！

这个表情确实代表了 unhelpful 的价值。完整的价值取值与表情的对应关系如下：

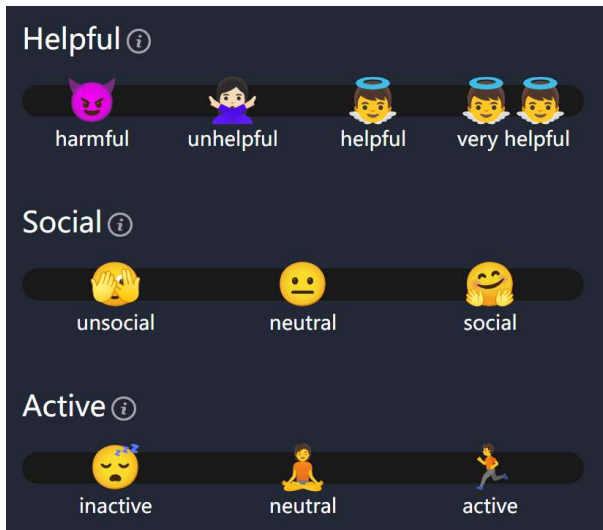

错误！

这个表情并不代表 inactive 的价值。完整的价值取值与表情的对应关系如下：

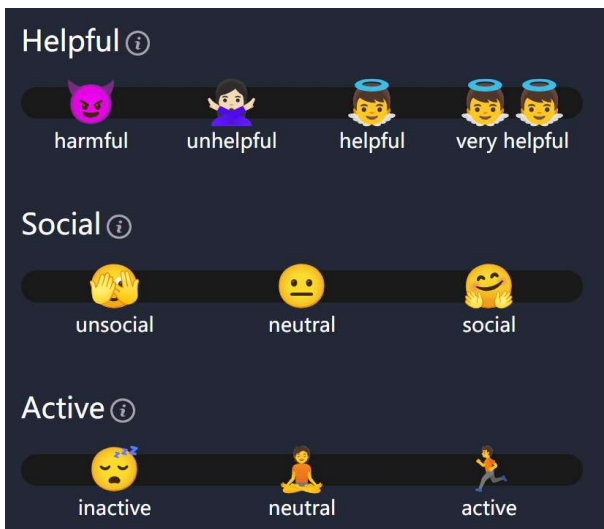

错误！

这个表情并不代表 neutral 的价值。完整的价值取值与表情的对应关系如下：



Q2-3

小黄人价值分布如下图所示，小黄人的初始意图是 ['PutInto', 'books\_5', 'box\_7']，请问下面哪一个是最优策略？

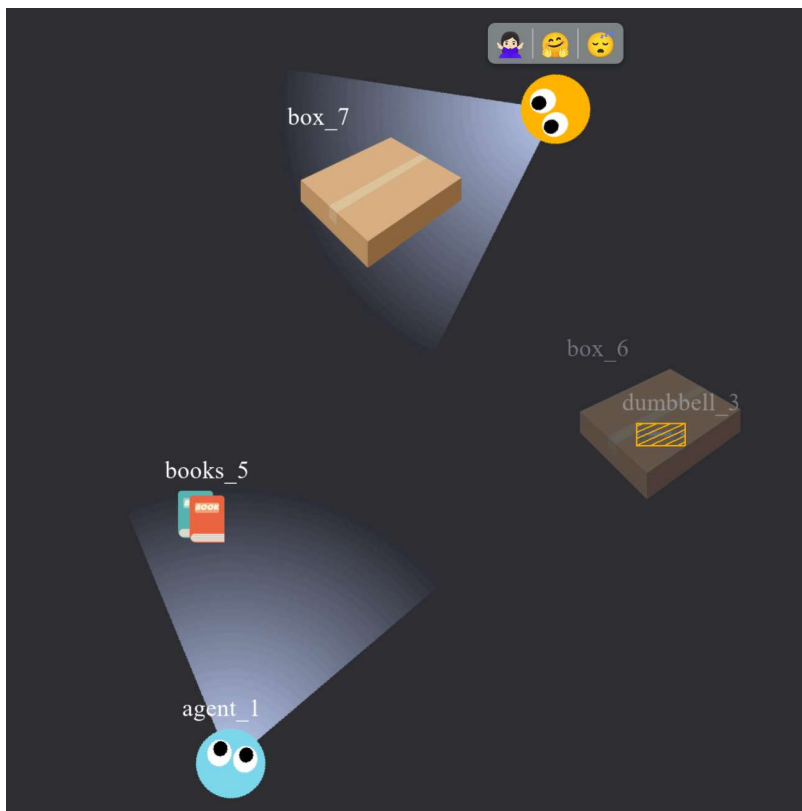

下图供您作为图例参考：

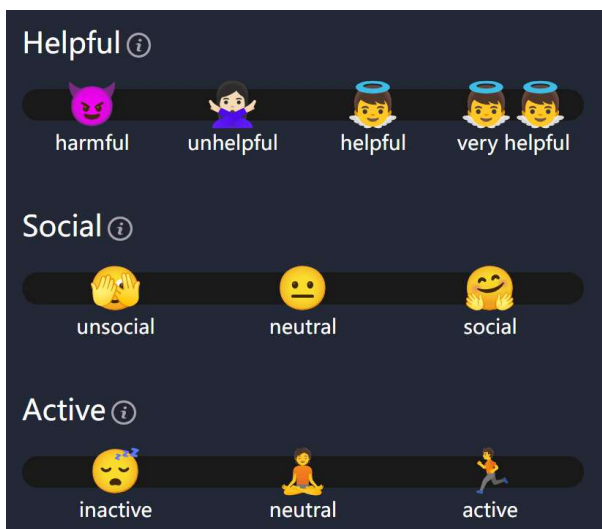

- ☐ 将小黄人的意图变为['RequestHelp', 'agent\_1', 'PutInto', 'books\_5', 'box\_7']，请求agent\_1来帮小黄人完成这个意图。
- ☐ 将小黄人的意图变为'none'，什么都不做了。
- ☐ 保持初始意图['PutInto', 'books\_5', 'box\_7']不变，小黄人自己完成这个意图。
- ☐ 看看另外一个智能体在干什么，将小黄人的意图改为去帮助它完成它的意图。



错误！

自己完成意图虽然可以完成初始意图，但是不符合小黄人“social（社交的）”和“inactive（不好动的）”的价值设定。

小黄人是 social（社交的） 的同时又 inactive（不好动的），寻求另一个智能体的帮助是最佳策略，这样既可以完成初始意图，也符合价值分布，是最佳策略。

错误！

小黄人有初始意图，“什么都不做”虽然符合小黄人的价值分布“inactive（不好动的）”，但是同时既没有完成初始意图，也不符合小黄人的价值分布中的“social（社交的）”，不是最佳策略。

小黄人是 social（社交的） 的同时又 inactive（不好动的），寻求另一个智能体的帮助是最佳策略，这样既可以完成初始意图，也符合价值分布，是最佳策略。

正确！

小黄人是 social（社交的） 的同时又 inactive（不好动的），寻求另一个智能体的帮助是最佳策略，这样既可以完成初始意图，也符合价值分布，是最佳策略。

求另一个智能体的帮助是最佳策略，这样既可以完成初始意图，也符合价值分布，是最佳策略。

错误！

帮助别人既无法完成小黄人的初始意图，也并不符合小黄人的 unhelpful（不助人的）的价值设定。

小黄人是 social（社交的）的同时又 inactive（不好动的），寻求另一个智能体的帮助是最佳策略，这样既可以完成初始意图，也符合价值分布，是最佳策略。

## Q2-4

如果你估计出另一个智能体的“最高层意图”是在找一个东西，但不确定他在找什么，只知道他现在的“子意图”是想走到box\_2那里，请问你在这一步估计对方意图的时候应该填哪一个意图？

- ☐ ['Find', 'box\_2']
- ☐ ['NA']
- ☐ ['Open', 'box\_2']
- ☐ ['Find', 'NA']

错误！

对方可能是要去寻找box\_2里面装着的另一个东西。

当你推测对方在寻找某物但不确定具体是什么时，['Find', 'NA']是最合适的表达方式，表示你知道对方有寻找的意图但不确定具体目标。

错误！

Open box\_2 仅描述了子意图，而不是你推测出的背后的高层意图“Find something”。

当你推测对方在寻找某物但不确定具体是什么时，['Find', 'NA']是最合适的表达方式，表示你知道对方有寻找的意图但不确定具体目标。

正确！

当你推测对方在寻找某物但不确定具体是什么时，['Find', 'NA']是最合适的表达方式，表示你知道对方有寻找的意图但不确定具体目标。

错误！

NA 表示你对对方的意图毫无推测，但实际上你推测到对方可能在寻找某物，只是不知道具体是什么。

这种情况下，['Find', 'NA'] 是最合适的表达方式，表示你知道对方有寻找的意图但不确定具体目标。

## Q2-5

如果小黄人现在的“最高层意图”是 ['Open', 'box\_3'] (box\_3 现在是 locked 的状态)，现在正在做一个子意图 ['Get', 'key\_2']，请问在这一步报告小黄人意图的时候，应该填哪一个意图？

- ☐ ['NA']
- ☐ ['Get', 'key\_2']
- ☐ ['Find', 'key\_2']
- ☐ ['Open', 'box\_3']

错误！

虽然小黄人当前执行的子意图是 ['Get', 'key\_2']，但报告时应反映小黄人的高层意图 ['Open', 'box\_3']，而不是子意图。

正确！

应该报告小黄人当前的高层意图 ['Open', 'box\_3']。

错误！

NA 表示小黄人没有明确的意图，而实际上小黄人是在执行 ['Open', 'box\_3'] 的高层意图。

错误！

也许 ['Find', 'key\_2'] 是进一步分解出来的子意图，但报告时应反映小黄人的高层意图 ['Open', 'box\_3']，而不是具体的子意图。

## Q2-6

请问意图 ['RequestHelp', 'agent\_2', 'PutInto', 'box\_3',

'shelf\_4']是什么意思？

- ☐ agent\_2 requests help to put shelf\_4 into box\_3
- ☐ agent\_2 requests help to put box\_3 into shelf\_4
- ☐ request agent\_2's help to put box\_3 into shelf\_4
- ☐ request agent\_2's help to put shelf\_4 into box\_3

错误！

这个意图不是 agent\_2 请求帮助，而是请求 agent\_2 提供帮助。

正确！

这个意图是请求 agent\_2 的帮助把 box\_3 放入 shelf\_4。

错误！

这个意图不是 agent\_2 请求帮助，而是请求 agent\_2 提供帮助；而且是将 box\_3 放入 shelf\_4，而不是将 shelf\_4 放入 box\_3。

错误!

目标是将 box\_3 放入 shelf\_4，而不是将 shelf\_4 放入 box\_3。

## Q2-7-MC

(多选) 如果小黄人想移动到shelf\_6，应该选择什么动作?



- ☐ 选择 ['MoveTo', 'shelf\_6']
- ☐ 选择 ['MoveTo', 'X: Y:'], 然后用鼠标将红色圆圈点在shelf\_6上
- ☐ 选择 ['PointTo', 'shelf\_6']
- ☐ 选择 ['RotateTo', 'box\_5']

正确！

选择 MoveTo 并指定 shelf\_6 或使用 MoveTo 然后鼠标点击目标位置，都是将小黄人移动到 shelf\_6 的合法有效方式。

错误！

要移动到 shelf\_6，你需要选择 MoveTo 相关的动作，即选择 MoveTo 并指定 shelf\_6，或者选择 MoveTo 然后鼠标点击目标位置。

错误！

这是一道多选题！

对于“MoveTo”和“RotateTo”这两个动作，您有两种方式选择目的地：

1. 选择某一个物体或者智能体
2. 选择“X: Y:”，然后用鼠标（这时会出现一个红色圆圈）将红色圆圈点在目标位置/方向



错误！

这是一道多选题！

对于“MoveTo”和“RotateTo”这两个动作，您有两种方式选择目的地：

1. 选择某一个物体或者智能体
2. 选择“X: Y:”，然后用鼠标（这时会出现一个红色圆圈）将红色圆圈点在目标位置/方向

## Q2-8-MC

**（多选）** 你需要推测另一个智能体的价值/意图，但是你完全不知道。你应该做什么？请选择两项（这是一个多选题！）

- ☐ 任意选择一个选项。
- ☐ 选择“NA”。
- ☐ 如果这与小黄人的意图和价值不冲突，在接下来的步骤中收集更多观察结果。
- ☐ 即使这与小黄人的意图和价值相冲突，也要在接下来的步骤中收集更多观察结果。

正确！

选择“NA”表示暂时不做出假设，或者在跟角色意图和价值不冲突的情况下继续收集信息，是推测对方价值或意图的最佳策略。

错误！

这是一个多选题！

选择“NA”表示暂时不做出假设，或者在跟角色意图和价值不冲突的情况下继续收集信息，是推测对方价值或意图的最佳策略。

错误！

这是一个多选题！

选择“NA”表示暂时不做出假设，或者在跟角色意图和价值不冲突的情况下继续收集信息，是推测对方价值或意图的最佳策略。

错误！

要推测对方的价值或意图，但暂时没有足够的观测，你应该选择“NA”并且在不与角色意图和价值冲突的前提下收集更多信息。

## Q2-9

你需要在每一步选择小黄人的意图，你应该：

- ☐ 根据场景和你个人的价值调整小黄人的意图。
- ☐ 随意选择一个新的意图。
- ☐ 坚持执行分配给小黄人的意图。
- ☐ 根据场景和分配给小黄人的价值调整小黄人的意图。

正确！

你应该根据当前的场景和小黄人的价值来选择小黄人的意图。

错误！

虽然执行分配给小黄人的初始意图很重要，但场景和小黄人的价值也必须考虑。你需要根据实际具体情况做出调整，而不是一定要一成不变地执行分配的初始意图。

错误！

这是一个角色扮演游戏！你应该根据小黄人的价值而不是你个人的价值来选择小黄人的意图。

错误！

不能随意选择新的意图。

你应该根据当前的场景和小黄人的价值来选择小黄人的意图。

## Q2-10

你需要在每一步选择小黄人的动作，你应该：

- ☐ 根据分配给小黄人的初始意图选择小黄人的行动。
- ☐ 根据你个人的意图和价值选择小黄人的行动。
- ☐ 根据分配给小黄人的初始意图和价值选择小黄人的行动。
- ☐ 根据小黄人的更新后的意图和分配的价值选择小黄人的行动。

正确！

应当基于小黄人**更新后的意图**和**分配的价值**来选择小黄人的行动。

错误！

这是一个角色扮演游戏！

你需要根据小黄人的意图和价值，而不是你个人的意图和价值来选择小黄人的行动。

错误！

应当基于小黄人**更新后的意图**和**分配给小黄人的价值**来选择小黄人的行动。

错误！

应当基于小黄人**更新后的意图**和**分配给小黄人的价值**来选择小黄人的行动。

## Q2-11-MC

**(多选)** 要获得游戏的最终奖励，你应该：（请在每一组里面选择一个最合适的选项，一共选择三个选项！）

- ☐ （第一组）尽力与其他智能体合作，不管小黄人的价值是否为helpful。
- ☐ （第一组）根据你个人的价值行动，不管小黄人是什么价值设定。
- ☐ （第一组）根据小黄人的价值行动，时刻记得一个角色扮演游戏。
- ☐ （第二组）尽力实现分配给小黄人的初始意图，即使你已经更新了意图。
- ☐ （第二组）尽力实现小黄人更新后的意图。
- ☐ （第三组）当小黄人的价值和意图冲突时，以意图为先。
- ☐ （第三组）当小黄人的价值和意图冲突时，以价值为先。
- ☐ （第三组）当小黄人的价值和意图冲突时，只要是全身心投入角色的设定和当时的具体情境，认真思考并作出合理决策即可。

正确！

结合小黄人的价值、更新后的意图和当前情境来做出合理决策；  
当小黄人的价值和意图冲突时，只要是全身心投入角色的设定和当时的具体情境，认真思考并作出合理决策即可。

错误！

结合小黄人的价值、更新后的意图和当前情境来做出合理决策；  
当小黄人的价值和意图冲突时，只要是全身心投入角色的设定和当时的具体情境，认真思考并作出合理决策即可。

错误！

这是一个多选题！

结合小黄人的价值、更新后的意图和当前情境来做出合理决策；  
当小黄人的价值和意图冲突时，只要是全身心投入角色的设定和当时的具体情境，认真思考并作出合理决策即可。

**Quiz 失败， 退出游戏**

很抱歉！ 您未通过Quiz 2， 且已经用完了2次尝试机会！

您已经退出游戏～我们会支付您完成教程和测试的部分报酬～

很感谢您对我们研究的兴趣！ 

## main game entrance

恭喜！您成功地完成了测试！ 🎉

下面可以开始进入热身游戏啦！ 🙌

Powered by Qualtrics
